# Supplementary material for: Towards standardisation: comparison of five whole genome sequencing (WGS) analysis pipelines for detection of epidemiologically linked tuberculosis cases
Source: PubMed Central journal article supplement (PMC6918587; doi:10.2807/1560-7917.es.2019.24.50.1900130), 2019-12-12
Supplement: 19-00130_SupplementaryTablesS1-S4.pdf [file 19-00130_SupplementaryTablesS1-S4.pdf]

## Supplementary Tables S1-S4

This supplementary material is hosted by *Eurosurveillance* as supporting information alongside the article [Towards standardisation: comparison of five whole genome sequencing (WGS) analysis pipelines for detection of epidemiologically linked tuberculosis cases], on behalf of the authors, who remain responsible for the accuracy and appropriateness of the content. The same standards for ethics, copyright, attributions and permissions as for the article apply. Supplements are not edited by *Eurosurveillance* and the journal is not responsible for the maintenance of any links or email addresses provided therein.

**Supplementary Table S1. 24-loci MIRU-VNTR classification of the 535 *M. tuberculosis* complex isolates. Five isolates are represented in duplicate as they had double alleles at one VNTR loci and therefore two distinct 24-loci MIRU-VNTR patterns. This supplementary material is hosted by *Eurosurveillance* as supporting information alongside the article [Towards standardisation: comparison of five whole genome sequencing (WGS) analysis pipelines for detection of epidemiologically linked tuberculosis cases], on behalf of the authors, who remain responsible for the accuracy and appropriateness of the content. The same standards for ethics, copyright, attributions and permissions as for the article apply. Supplements are not edited by *Eurosurveillance* and the journal is not responsible for the maintenance of any links or email addresses provided therein.**

| strain     | V<br>N<br>T<br>R<br>5<br>8<br>0 | V<br>N<br>T<br>R<br>9<br>9<br>6 | V<br>N<br>T<br>R<br>8<br>0<br>2 | V<br>N<br>T<br>R<br>9<br>6<br>4 | V<br>N<br>T<br>R<br>1<br>3<br>4 | V<br>N<br>T<br>R<br>3<br>1<br>2 | V<br>N<br>T<br>R<br>4<br>5<br>4 | V<br>N<br>T<br>R<br>2<br>7<br>2 | V<br>N<br>T<br>R<br>3<br>6<br>5 | V<br>N<br>T<br>R<br>2<br>4<br>1 | V<br>N<br>T<br>R<br>3<br>6<br>0 | V<br>N<br>T<br>R<br>4<br>1<br>5 | V<br>N<br>T<br>R<br>2<br>1<br>3 | V<br>N<br>T<br>R<br>1<br>6<br>3 | V<br>N<br>T<br>R<br>4<br>9<br>5 | V<br>N<br>T<br>R<br>0<br>5<br>2 | V<br>N<br>T<br>R<br>1<br>5<br>3 | V<br>N<br>T<br>R<br>2<br>3<br>4 | V<br>N<br>T<br>R<br>2<br>6<br>0 | V<br>N<br>T<br>R<br>3<br>0<br>3 | V<br>N<br>T<br>R<br>2<br>8<br>7 | V<br>N<br>T<br>R<br>3<br>3<br>4 | V<br>N<br>T<br>R<br>2<br>4<br>1 |   |
|------------|---------------------------------|---------------------------------|---------------------------------|---------------------------------|---------------------------------|---------------------------------|---------------------------------|---------------------------------|---------------------------------|---------------------------------|---------------------------------|---------------------------------|---------------------------------|---------------------------------|---------------------------------|---------------------------------|---------------------------------|---------------------------------|---------------------------------|---------------------------------|---------------------------------|---------------------------------|---------------------------------|---|
| ERX2465512 | 2                               | 5                               | 4                               | 3                               | 1                               | 3                               | 2                               | 4                               | 3                               | 2                               | 3                               | 2                               | 3                               | 2                               | 2                               | 2                               | 5                               | 2                               | 2                               | 1                               | 3                               | 4                               | 2                               | 3 |
| ERX2465208 | 2                               | 6                               | 3                               | 5                               | 3                               | 3                               | 2                               | 3                               | 3                               | 3                               | 3                               | 3                               | 4                               | 2                               | 7                               | 2                               | 3                               | 2                               | 2                               | 1                               | 3                               | 2                               | 2                               | 3 |
| ERX2465608 | 3                               | 2                               | 2                               | 4                               | 3                               | 4                               | 1                               | 4                               | 4                               | 2                               | 2                               | 1                               | 9                               | 0                               | 5                               | 2                               | 6                               | 3                               | 2                               | 2                               | 3                               | 3                               | 6                               | 3 |
| ERX2465437 | 2                               | 4                               | 3                               | 5                               | 4                               | 5                               | 4                               | 2                               | 4                               | 2                               | 3                               | 4                               | 2                               | 4                               | 8                               | 2                               | 5                               | 3                               | 2                               | 1                               | 3                               | 4                               | 2                               | 3 |
| ERX2465317 | 4                               | 2                               | 3                               | 4                               | 3                               | 5                               | 1                               | 4                               | 9                               | 2                               | 4                               | 1                               | 4                               | 6                               | 4                               | 2                               | 6                               | 3                               | 2                               | 2                               | 1                               | 3                               | 3                               | 3 |
| ERX2465584 | 2                               | 5                               | 4                               | 4                               | 3                               | 3                               | 4                               | 3                               | 3                               | 4                               | 3                               | 3                               | 3                               | 3                               | 5                               | 2                               | 5                               | 2                               | 2                               | 1                               | 3                               | 4                               | 2                               | 3 |
| ERX2465264 | 2                               | 6                               | 3                               | 5                               | 3                               | 3                               | 2                               | 3                               | 3                               | 3                               | 3                               | 3                               | 4                               | 2                               | 7                               | 2                               | 3                               | 2                               | 2                               | 1                               | 3                               | 2                               | 2                               | 3 |
| ERX2465292 | 2                               | 5                               | 1                               | 3                               | 3                               | 3                               | 2                               | 5                               | 3                               | 2                               | 6                               | 2                               | 5                               | 2                               | 5                               | 1                               | 6                               | 2                               | 2                               | 1                               | 3                               | 4                               | 2                               | 3 |
| ERX2465384 | 2                               | 5                               | 5                               | 3                               | 1                               | 3                               | 2                               | 4                               | 2                               | 2                               | 3                               | 2                               | 4                               | 2                               | 2                               | 2                               | 5                               | 2                               | 2                               | 1                               | 3                               | 4                               | 2                               | 3 |
| ERX2465263 | 2                               | 4                               | 2                               | 3                               | 4                               | 3                               | 2                               | 4                               | 2                               | 2                               | 3                               | 2                               | 5                               | 2                               | 4,<br>5                         | 2                               | 5                               | 2                               | 2                               | 1                               | 1                               | 4                               | 2                               | 2 |
| ERX2465424 | 4                               | 2                               | 3                               | 4                               | 3                               | 5                               | 2                               | 3                               | 5                               | 2                               | 4                               | 1                               | 7                               | 6                               | 5                               | 2                               | 6                               | 3                               | 2                               | 2                               | 3                               | 3                               | 3                               | 3 |
| ERX2465507 | 5                               | 2                               | 2                               | 4                               | 3                               | 4                               | 1                               | 2                               | 4                               | 2                               | 2                               | 1                               | 9                               | 1                               | 6                               | 2                               | 6                               | 3                               | 2                               | 2                               | 3                               | 3                               | 6                               | 3 |
| ERX2465312 | 4                               | 5                               | 2                               | 2                               | 3                               | 3                               | 4                               | 4                               | 2                               | 2                               | 1                               | 2                               | -2                              | 1                               | 8                               | 2                               | 4                               | 2                               | 2                               | 1                               | 2                               | 4                               | 2                               | 3 |
| ERX2465675 | 2                               | 5                               | 3                               | 4                               | 3                               | 3                               | 2                               | 3                               | 3                               | 4                               | 3                               | 3                               | 5                               | 3                               | 5                               | 2                               | 5                               | 2                               | 2                               | 1                               | 3                               | 4                               | 2                               | 3 |
| ERX2465673 | 5                               | 1                               | 2                               | 4                               | 2                               | 5                               | 2                               | 4                               | 7                               | 2                               | 2                               | 1                               | 7                               | 8                               | 7                               | 2                               | 6                               | 2                               | 2                               | 2                               | 3                               | 3                               | 5                               | 3 |
| ERX2465314 | 2                               | 5                               | 1                               | 3                               | 3                               | 3                               | 2                               | 4                               | 3                               | 2                               | 5                               | 2                               | 3                               | 2                               | 4                               | 2                               | 6                               | 2                               | 2                               | 1                               | 3                               | 4                               | 1                               | 3 |
| ERX2465525 | 5                               | 1                               | 3                               | 4                               | 3                               | 6                               | 2                               | 4                               | 6                               | 1                               | 4                               | 1                               | 3                               | 8                               | 6                               | 2                               | 0                               | 3                               | 2                               | 2                               | 3                               | 3                               | 4                               | 3 |
| ERX2465411 | 5                               | 1                               | 2                               | 4                               | 2                               | 5                               | 2                               | 4                               | 7                               | 2                               | 2                               | 1                               | 7                               | 8                               | 7                               | 2                               | 6                               | 2                               | 2                               | 2                               | 3                               | 3                               | 5                               | 3 |
| ERX2465180 | 3                               | 5                               | 1                               | 3                               | 3                               | 2                               | 3                               | 4                               | 1                               | 1                               | 2                               | 2                               | 2                               | 3                               | 6                               | 1                               | 6                               | 2                               | 2                               | 1                               | 3                               | 4                               | 2                               | 3 |

|            |   |   |   |   |   |   |   |   |   |   |   |   |    |   |   |   |   |   |   |   |   |   |   |   |   |
|------------|---|---|---|---|---|---|---|---|---|---|---|---|----|---|---|---|---|---|---|---|---|---|---|---|---|
| ERX2465481 | 2 | 6 | 4 | 4 | 3 | 3 | 2 | 3 | 3 | 4 | 3 | 3 | 3  | 2 | 7 | 2 | 5 | 2 | 2 | 1 | 3 | 4 | 2 | 3 |   |
| ERX2465591 | 2 | 5 | 3 | 6 | 4 | 5 | 3 | 2 | 4 | 2 | 3 | 4 | 2  | 4 | 7 | 2 | 5 | 3 | 2 | 1 | 3 | 4 | 2 | 3 |   |
| ERX2465293 | 5 | 1 | 2 | 4 | 2 | 5 | 2 | 4 | 7 | 2 | 2 | 1 | 7  | 8 | 7 | 2 | 6 | 2 | 2 | 2 | 3 | 3 | 5 | 3 |   |
| ERX2465635 | 2 | 5 | 1 | 4 | 3 | 3 | 4 | 4 | 2 | 2 | 2 | 2 | 3  | 2 | 6 | 2 | 6 | 2 | 2 | 1 | 3 | 4 | 2 | 3 |   |
| ERX2465441 | 2 | 1 | 2 | 1 | 0 | 2 | 2 | 2 | 4 | 4 | 4 | 3 | 3  | 2 | 3 | 8 | 2 | 5 | 2 | 2 | 1 | 3 | 4 | 2 | 3 |
| ERX2465441 | 2 | 1 | 2 | 9 | 2 | 2 | 2 | 4 | 4 | 4 | 3 | 3 | 2  | 3 | 8 | 2 | 5 | 2 | 2 | 1 | 3 | 4 | 2 | 3 |   |
| ERX2465587 | 2 | 5 | 3 | 5 | 3 | 3 | 2 | 3 | 3 | 3 | 3 | 2 | 6  | 2 | 7 | 2 | 3 | 2 | 1 | 1 | 3 | 2 | 2 | 3 |   |
| ERX2465503 | 2 | 8 | 5 | 3 | 3 | 3 | 2 | 4 | 3 | 2 | 4 | 0 | 3  | 2 | 5 | 2 | 6 | 2 | 2 | 1 | 3 | 4 | 2 | 3 |   |
| ERX2465399 | 5 | 2 | 3 | 4 | 3 | 6 | 2 | 4 | 6 | 1 | 4 | 1 | 3  | 1 | 6 | 2 | 0 | 3 | 2 | 2 | 3 | 3 | 4 | 3 |   |
| ERX2465593 | 2 | 4 | 2 | 2 | 2 | 4 | 2 | 4 | 3 | 2 | 1 | 2 | 4  | 2 | 6 | 2 | 3 | 2 | 1 | 1 | 3 | 4 | 2 | 3 |   |
| ERX2465373 | 2 | 5 | 3 | 3 | 2 | 3 | 2 | 2 | 3 | 2 | 2 | 2 | 2  | 2 | 6 | 2 | 5 | 2 | 2 | 1 | 4 | 4 | 2 | 3 |   |
| ERX2465323 | 5 | 2 | 3 | 4 | 2 | 5 | 2 | 4 | 5 | 2 | 4 | 1 | 2  | 5 | 6 | 2 | 5 | 3 | 2 | 2 | 3 | 3 | 3 | 3 |   |
| ERX2465571 | 5 | 2 | 2 | 4 | 3 | 4 | 1 | 4 | 4 | 2 | 2 | 1 | 9  | 0 | 4 | 2 | 6 | 2 | 2 | 2 | 3 | 3 | 6 | 3 |   |
| ERX2465239 | 2 | 5 | 3 | 6 | 4 | 5 | 3 | 2 | 4 | 2 | 3 | 4 | 2  | 4 | 7 | 2 | 5 | 3 | 2 | 1 | 3 | 4 | 2 | 3 |   |
| ERX2465304 | 2 | 7 | 3 | 4 | 3 | 4 | 5 | 4 | 4 | 4 | 3 | 2 | 5  | 5 | 9 | 2 | 5 | 3 | 2 | 1 | 3 | 4 | 2 | 3 |   |
| ERX2465610 | 2 | 5 | 3 | 6 | 4 | 5 | 3 | 2 | 4 | 2 | 3 | 4 | 2  | 4 | 9 | 2 | 5 | 3 | 2 | 1 | 3 | 4 | 2 | 3 |   |
| ERX2465228 | 2 | 1 | 2 | 1 | 0 | 2 | 3 | 3 | 4 | 4 | 3 | 3 | 3  | 2 | 3 | 8 | 2 | 5 | 2 | 2 | 1 | 3 | 4 | 2 | 3 |
| ERX2465589 | 5 | 2 | 2 | 4 | 2 | 3 | 2 | 4 | 7 | 2 | 2 | 1 | 2  | 2 | 6 | 2 | 6 | 2 | 2 | 2 | 3 | 3 | 5 | 3 |   |
| ERX2465187 | 2 | 5 | 4 | 4 | 2 | 3 | 4 | 2 | 2 | 2 | 1 | 2 | 3  | 2 | 6 | 2 | 6 | 1 | 2 | 1 | 3 | 4 | 2 | 1 |   |
| ERX2465283 | 2 | 4 | 1 | 6 | 2 | 5 | 2 | 6 | 4 | 4 | 4 | 3 | 3  | 3 | 6 | 2 | 4 | 2 | 2 | 2 | 3 | 3 | 4 | 3 |   |
| ERX2465664 | 2 | 7 | 3 | 3 | 3 | 1 | 4 | 4 | 4 | 4 | 3 | 2 | 5  | 5 | 8 | 2 | 5 | 3 | 2 | 1 | 3 | 4 | 2 | 3 |   |
| ERX2465579 | 2 | 5 | 3 | 5 | 3 | 3 | 2 | 3 | 3 | 4 | 3 | 3 | 4  | 3 | 7 | 2 | 5 | 2 | 2 | 1 | 3 | 4 | 2 | 3 |   |
| ERX2465405 | 2 | 5 | 1 | 3 | 2 | 3 | 1 | 4 | 2 | 1 | 2 | 2 | 2  | 3 | 4 | 2 | 6 | 2 | 2 | 1 | 3 | 5 | 2 | 3 |   |
| ERX2465470 | 3 | 3 | 2 | 6 | 2 | 5 | 2 | 5 | 4 | 4 | 4 | 3 | 4  | 3 | 6 | 2 | 4 | 2 | 1 | 2 | 3 | 3 | 4 | 3 |   |
| ERX2465463 | 2 | 4 | 3 | 3 | 1 | 3 | 3 | 4 | 3 | 2 | 4 | 2 | 3  | 2 | 5 | 2 | 5 | 2 | 2 | 1 | 3 | 4 | 2 | 3 |   |
| ERX2465671 | 2 | 5 | 5 | 3 | 1 | 3 | 3 | 4 | 3 | 2 | 2 | 2 | 3  | 2 | 5 | 2 | 5 | 2 | 1 | 1 | 3 | 4 | 2 | 3 |   |
| ERX2465505 | 2 | 4 | 4 | 3 | 1 | 3 | 2 | 4 | 3 | 2 | 4 | 2 | 4  | 2 | 4 | 2 | 5 | 2 | 2 | 1 | 3 | 4 | 2 | 3 |   |
| ERX2465275 | 3 | 5 | 2 | 3 | 2 | 2 | 3 | 4 | 4 | 2 | 3 | 2 | 5  | 1 | 8 | 3 | 5 | 2 | 1 | 1 | 3 | 4 | 2 | 2 |   |
| ERX2465563 | 2 | 5 | 1 | 4 | 3 | 3 | 4 | 4 | 2 | 2 | 2 | 2 | 3  | 2 | 6 | 2 | 6 | 2 | 2 | 1 | 3 | 4 | 2 | 3 |   |
| ERX2465363 | 2 | 1 | 2 | 5 | 1 | 3 | 1 | 4 | 3 | 4 | 3 | 3 | 1  | 3 | 6 | 2 | 5 | 2 | 2 | 1 | 3 | 4 | 2 | 3 |   |
| ERX2465161 | 2 | 5 | 3 | 5 | 3 | 3 | 2 | 3 | 3 | 4 | 1 | 3 | 6  | 3 | 5 | 2 | 5 | 2 | 2 | 1 | 3 | 4 | 2 | 3 |   |
| ERX2465596 | 2 | 7 | 3 | 6 | 4 | 5 | 4 | 2 | 4 | 2 | 3 | 2 | 2  | 4 | 8 | 2 | 5 | 3 | 2 | 1 | 3 | 4 | 2 | 3 |   |
| ERX2465487 | 2 | 7 | 3 | 5 | 4 | 5 | 5 | 2 | 4 | 2 | 3 | 4 | 2  | 4 | 8 | 2 | 5 | 3 | 2 | 1 | 3 | 4 | 2 | 3 |   |
| ERX2465514 | 2 | 5 | 1 | 2 | 3 | 4 | 2 | 4 | 3 | 2 | 3 | 2 | 4  | 3 | 4 | 2 | 5 | 2 | 2 | 1 | 3 | 3 | 2 | 3 |   |
| ERX2465580 | 2 | 7 | 3 | 4 | 3 | 5 | 4 | 2 | 4 | 2 | 3 | 4 | 2  | 4 | 7 | 2 | 5 | 3 | 2 | 1 | 3 | 4 | 2 | 3 |   |
| ERX2465502 | 2 | 5 | 3 | 6 | 5 | 5 | 3 | 2 | 4 | 2 | 3 | 4 | 2  | 4 | 9 | 2 | 5 | 3 | 2 | 1 | 3 | 4 | 2 | 3 |   |
| ERX2465619 | 6 | 2 | 2 | 4 | 3 | 4 | 1 | 4 | 4 | 2 | 2 | 1 | 8  | 1 | 2 | 7 | 2 | 6 | 2 | 2 | 2 | 3 | 3 | 6 | 3 |
| ERX2465313 | 5 | 2 | 3 | 4 | 3 | 5 | 2 | 2 | 9 | 2 | 7 | 1 | 3  | 1 | 4 | 2 | 6 | 1 | 2 | 2 | 3 | 3 | 4 | 3 |   |
| ERX2465409 | 2 | 1 | 4 | 7 | 3 | 4 | 4 | 2 | 4 | 2 | 2 | 4 | 2  | 3 | 5 | 2 | 5 | 3 | 2 | 1 | 3 | 4 | 2 | 3 |   |
| ERX2465219 | 2 | 5 | 3 | 5 | 3 | 3 | 2 | 3 | 3 | 4 | 4 | 3 | 6  | 3 | 6 | 2 | 3 | 2 | 1 | 1 | 3 | 2 | 2 | 3 |   |
| ERX2465266 | 2 | 8 | 3 | 5 | 5 | 5 | 4 | 2 | 4 | 4 | 3 | 4 | 2  | 4 | 3 | 2 | 5 | 3 | 2 | 1 | 3 | 4 | 2 | 3 |   |
| ERX2465531 | 2 | 1 | 4 | 7 | 4 | 4 | 4 | 2 | 2 | 2 | 2 | 4 | -2 | 3 | 4 | 2 | 5 | 3 | 2 | 1 | 3 | 4 | 2 | 3 |   |
| ERX2465397 | 2 | 1 | 4 | 7 | 4 | 4 | 4 | 2 | 4 | 2 | 2 | 4 | 2  | 3 | 5 | 2 | 5 | 3 | 2 | 1 | 3 | 4 | 2 | 3 |   |
| ERX2465303 | 2 | 5 | 1 | 4 | 1 | 3 | 2 | 4 | 2 | 1 | 2 | 2 | 3  | 3 | 7 | 2 | 6 | 2 | 2 | 1 | 2 | 4 | 1 | 5 |   |

|            |   |   |   |   |   |   |   |   |   |   |    |   |    |   |    |   |   |   |   |   |   |   |   |   |
|------------|---|---|---|---|---|---|---|---|---|---|----|---|----|---|----|---|---|---|---|---|---|---|---|---|
| ERX2465245 | 2 | 5 | 3 | 6 | 4 | 5 | 3 | 2 | 4 | 2 | 3  | 4 | 2  | 4 | 7  | 2 | 5 | 3 | 2 | 1 | 3 | 4 | 2 | 3 |
| ERX2465674 | 3 | 5 | 2 | 3 | 3 | 3 | 3 | 4 | 4 | 2 | 3  | 2 | 5  | 1 | 9  | 3 | 5 | 2 | 1 | 1 | 3 | 4 | 2 | 3 |
| ERX2465509 | 2 | 5 | 1 | 2 | 3 | 3 | 2 | 4 | 4 | 2 | 2  | 2 | 3  | 3 | 5  | 2 | 5 | 2 | 1 | 1 | 3 | 4 | 2 | 3 |
| ERX2465235 | 2 | 1 | 2 | 5 | 1 | 3 | 3 | 1 | 2 | 4 | 3  | 3 | 1  | 3 | 8  | 2 | 5 | 2 | 2 | 1 | 3 | 2 | 2 | 2 |
| ERX2465300 | 2 | 4 | 4 | 4 | 3 | 3 | 2 | 3 | 3 | 4 | 3  | 3 | 6  | 3 | 8  | 2 | 5 | 2 | 2 | 1 | 3 | 4 | 2 | 3 |
| ERX2465199 | 2 | 5 | 4 | 6 | 3 | 3 | 2 | 3 | 3 | 4 | 3  | 3 | 4  | 3 | 5  | 2 | 5 | 2 | 2 | 1 | 3 | 4 | 2 | 3 |
| ERX2465551 | 2 | 5 | 2 | 3 | 2 | 3 | 2 | 4 | 3 | 2 | 3  | 2 | 2  | 2 | 5  | 2 | 5 | 2 | 2 | 1 | 3 | 4 | 2 | 3 |
| ERX2465170 | 2 | 6 | 3 | 4 | 3 | 4 | 2 | 3 | 3 | 4 | 7  | 3 | 2  | 4 | 5  | 2 | 5 | 2 | 2 | 1 | 3 | 4 | 2 | 3 |
| ERX2465622 | 2 | 1 | 4 | 7 | 4 | 4 | 4 | 2 | 4 | 2 | 2  | 4 | 2  | 3 | 5  | 2 | 5 | 4 | 2 | 1 | 3 | 4 | 2 | 3 |
| ERX2465686 | 2 | 5 | 3 | 2 | 3 | 3 | 3 | 4 | 3 | 2 | 3  | 2 | 2  | 5 | 3  | 2 | 5 | 2 | 2 | 1 | 3 | 4 | 1 | 2 |
| ERX2465260 | 3 | 5 | 2 | 2 | 3 | 3 | 2 | 5 | 3 | 4 | 2  | 1 | 2  | 3 | 5  | 2 | 4 | 2 | 2 | 2 | 3 | 3 | 3 | 3 |
| ERX2465390 | 2 | 5 | 3 | 5 | 3 | 5 | 2 | 3 | 3 | 4 | 4  | 2 | 3  | 2 | 7  | 2 | 3 | 2 | 1 | 1 | 3 | 2 | 2 | 3 |
| ERX2465458 | 2 | 6 | 3 | 5 | 3 | 3 | 2 | 3 | 3 | 3 | 3  | 3 | 4  | 2 | 7  | 2 | 3 | 2 | 2 | 1 | 3 | 2 | 2 | 3 |
| ERX2465213 | 2 | 5 | 3 | 5 | 3 | 3 | 2 | 3 | 3 | 4 | 3  | 3 | 7  | 3 | 5  | 2 | 5 | 2 | 2 | 1 | 3 | 4 | 2 | 3 |
| ERX2465529 | 2 | 6 | 3 | 5 | 3 | 3 | 2 | 3 | 3 | 3 | 3  | 3 | 4  | 2 | 7  | 2 | 3 | 2 | 2 | 1 | 3 | 2 | 2 | 3 |
| ERX2465371 | 2 | 5 | 3 | 6 | 4 | 5 | 3 | 2 | 4 | 2 | 3  | 4 | 2  | 4 | 7  | 2 | 5 | 3 | 2 | 1 | 3 | 4 | 2 | 3 |
| ERX2465506 | 2 | 7 | 3 | 6 | 4 | 7 | 3 | 2 | 4 | 2 | 3  | 2 | 2  | 5 | 8  | 2 | 5 | 3 | 2 | 1 | 3 | 4 | 2 | 3 |
| ERX2465659 | 2 | 6 | 3 | 2 | 3 | 3 | 2 | 4 | 3 | 2 | 3  | 2 | 3  | 3 | 6  | 2 | 5 | 2 | 2 | 1 | 3 | 4 | 1 | 3 |
| ERX2465520 | 2 | 5 | 3 | 6 | 4 | 5 | 3 | 2 | 4 | 2 | 3  | 4 | 2  | 4 | 7  | 2 | 5 | 3 | 2 | 1 | 3 | 4 | 2 | 3 |
| ERX2465537 | 2 | 7 | 3 | 2 | 3 | 5 | 4 | 4 | 4 | 4 | 3  | 2 | 6  | 5 | 8  | 2 | 5 | 4 | 2 | 1 | 3 | 4 | 2 | 3 |
| ERX2465259 | 2 | 7 | 1 | 3 | 3 | 3 | 2 | 4 | 3 | 2 | 6  | 2 | 5  | 2 | 5  | 1 | 6 | 2 | 2 | 1 | 3 | 4 | 2 | 3 |
| ERX2465336 | 2 | 4 | 1 | 3 | 3 | 4 | 1 | 4 | 2 | 2 | 5  | 2 | 3  | 2 | 4  | 2 | 6 | 2 | 2 | 1 | 3 | 4 | 2 | 3 |
| ERX2465457 | 2 | 4 | 5 | 3 | 1 | 3 | 2 | 2 | 2 | 2 | 5  | 2 | 3  | 2 | 5  | 2 | 5 | 2 | 2 | 1 | 3 | 4 | 2 | 3 |
| ERX2465556 | 2 | 2 | 3 | 4 | 1 | 3 | 2 | 4 | 2 | 2 | 1  | 2 | 4  | 3 | 7  | 2 | 6 | 2 | 2 | 1 | 3 | 4 | 2 | 1 |
| ERX2465365 | 2 | 4 | 2 | 3 | 4 | 3 | 2 | 3 | 2 | 2 | 3  | 2 | 4  | 2 | 3  | 2 | 5 | 2 | 2 | 1 | 3 | 4 | 2 | 3 |
| ERX2465256 | 2 | 1 | 2 | 5 | 1 | 3 | 1 | 4 | 3 | 4 | 3  | 3 | 1  | 3 | 7  | 2 | 5 | 2 | 2 | 1 | 3 | 4 | 2 | 3 |
| ERX2465683 | 2 | 4 | 4 | 3 | 1 | 2 | 2 | 5 | 3 | 2 | 5  | 2 | 4  | 2 | 5  | 2 | 5 | 2 | 2 | 1 | 3 | 4 | 2 | 3 |
| ERX2465374 | 2 | 4 | 3 | 3 | 3 | 3 | 2 | 3 | 3 | 4 | 5, | 3 | 2  | 3 | 7  | 2 | 5 | 2 | 2 | 1 | 3 | 4 | 2 | 3 |
| ERX2465345 | 2 | 4 | 1 | 3 | 1 | 3 | 2 | 4 | 3 | 2 | 5  | 2 | 4  | 2 | 5  | 2 | 6 | 2 | 2 | 1 | 3 | 4 | 2 | 3 |
| ERX2465575 | 2 | 7 | 3 | 3 | 3 | 5 | 4 | 4 | 4 | 4 | 3  | 2 | 5  | 5 | 7  | 2 | 5 | 3 | 2 | 1 | 3 | 4 | 2 | 3 |
| ERX2465247 | 2 | 4 | 1 | 6 | 4 | 2 | 1 | 4 | 3 | 4 | 3  | 3 | -2 | 2 | 2  | 2 | 4 | 2 | 2 | 2 | 4 | 3 | 2 | 3 |
| ERX2465632 | 2 | 7 | 3 | 3 | 3 | 5 | 4 | 4 | 4 | 2 | 3  | 4 | 6  | 4 | 5  | 2 | 5 | 2 | 2 | 1 | 3 | 4 | 2 | 3 |
| ERX2465536 | 5 | 2 | 3 | 4 | 3 | 6 | 2 | 4 | 6 | 1 | 5  | 1 | 3  | 6 | 6  | 2 | 6 | 3 | 2 | 2 | 3 | 3 | 1 | 3 |
| ERX2465585 | 2 | 8 | 4 | 4 | 3 | 4 | 4 | 4 | 2 | 2 | 4  | 2 | 3  | 2 | 5  | 2 | 5 | 2 | 2 | 1 | 2 | 4 | 2 | 3 |
| ERX2465428 | 2 | 5 | 4 | 5 | 3 | 3 | 2 | 3 | 3 | 4 | 3  | 3 | 3  | 3 | 5, | 2 | 5 | 2 | 2 | 1 | 3 | 4 | 2 | 3 |
| ERX2465455 | 2 | 5 | 2 | 4 | 3 | 3 | 2 | 4 | 3 | 4 | 3  | 3 | 3  | 4 | 0  | 2 | 5 | 2 | 2 | 1 | 3 | 4 | 2 | 3 |
| ERX2465205 | 2 | 7 | 3 | 5 | 4 | 8 | 4 | 2 | 4 | 2 | 3  | 4 | 2  | 4 | 8  | 2 | 5 | 4 | 2 | 1 | 3 | 3 | 2 | 3 |
| ERX2465600 | 2 | 5 | 3 | 4 | 3 | 3 | 2 | 3 | 3 | 4 | 3  | 3 | 3  | 2 | 7  | 2 | 5 | 2 | 1 | 1 | 3 | 4 | 2 | 3 |
| ERX2465444 | 2 | 8 | 4 | 4 | 3 | 4 | 4 | 5 | 2 | 2 | 6  | 2 | 2  | 2 | 5  | 2 | 4 | 2 | 2 | 1 | 2 | 4 | 2 | 3 |
| ERX2465340 | 2 | 4 | 3 | 4 | 3 | 3 | 2 | 4 | 2 | 1 | 4  | 2 | 2  | 3 | 7  | 2 | 6 | 2 | 2 | 1 | 3 | 4 | 2 | 3 |
| ERX2465582 | 3 | 5 | 4 | 5 | 3 | 3 | 2 | 3 | 3 | 4 | 3  | 3 | 5  | 3 | 6  | 2 | 5 | 2 | 2 | 1 | 3 | 4 | 2 | 3 |
| ERX2465401 | 2 | 1 | 1 | 3 | 3 | 3 | 2 | 4 | 2 | 2 | 2  | 2 | 5  | 2 | 2  | 2 | 6 | 2 | 2 | 1 | 3 | 4 | 2 | 3 |
| ERX2465450 | 2 | 5 | 1 | 3 | 1 | 3 | 3 | 4 | 3 | 1 | 2  | 2 | 5  | 3 | 7  | 2 | 6 | 2 | 2 | 1 | 2 | 4 | 1 | 5 |
| ERX2465443 | 2 | 5 | 3 | 6 | 4 | 5 | 3 | 2 | 4 | 2 | 3  | 4 | 2  | 4 | 7  | 2 | 5 | 3 | 2 | 1 | 3 | 4 | 2 | 3 |
| ERX2465528 | 3 | 4 | 3 | 4 | 3 | 3 | 4 | 4 | 4 | 2 | 3  | 3 | 4  | 1 | 9  | 2 | 5 | 2 | 2 | 1 | 3 | 4 | 2 | 3 |
| ERX2465431 | 2 | 5 | 5 | 5 | 3 | 3 | 2 | 3 | 3 | 4 | 5  | 1 | 6  | 4 | 5  | 2 | 5 | 2 | 2 | 1 | 3 | 4 | 2 | 3 |

|            |   |   |   |   |   |   |   |   |   |   |   |   |    |   |    |   |   |   |   |   |   |   |   |   |   |
|------------|---|---|---|---|---|---|---|---|---|---|---|---|----|---|----|---|---|---|---|---|---|---|---|---|---|
| ERX2465367 | 2 | 5 | 3 | 5 | 3 | 3 | 2 | 3 | 3 | 4 | 3 | 3 | 3  | 5 | 2  | 5 | 2 | 2 | 1 | 3 | 4 | 2 | 2 |   |   |
| ERX2465251 | 2 | 5 | 3 | 6 | 4 | 5 | 3 | 2 | 4 | 2 | 3 | 4 | 2  | 3 | 7  | 2 | 3 | 3 | 2 | 1 | 3 | 4 | 2 | 3 |   |
| ERX2465479 | 2 | 5 | 3 | 3 | 2 | 3 | 2 | 4 | 3 | 2 | 3 | 2 | 2  | 2 | 5  | 2 | 2 | 2 | 2 | 1 | 3 | 2 | 2 | 3 |   |
| ERX2465513 | 5 | 2 | 3 | 6 | 3 | 5 | 2 | 2 | 9 | 2 | 8 | 1 | 4  | 7 | 3  | 2 | 7 | 1 | 2 | 2 | 3 | 3 | 4 | 3 |   |
| ERX2465377 | 2 | 5 | 3 | 5 | 3 | 3 | 2 | 3 | 3 | 4 | 2 | 3 | 4  | 3 | 4  | 2 | 5 | 2 | 2 | 1 | 3 | 4 | 2 | 3 |   |
| ERX2465687 | 2 | 3 | 3 | 3 | 3 | 5 | 4 | 4 | 4 | 2 | 3 | 5 | 7  | 4 | 7, | 5 | 2 | 5 | 3 | 2 | 1 | 3 | 4 | 2 | 3 |
| ERX2465642 | 1 | 5 | 3 | 3 | 3 | 4 | 2 | 5 | 4 | 2 | 3 | 2 | 2  | 3 | 4  | 2 | 5 | 2 | 1 | 1 | 3 | 4 | 1 | 3 |   |
| ERX2465273 | 2 | 5 | 3 | 6 | 4 | 5 | 3 | 2 | 4 | 2 | 3 | 4 | 2  | 4 | 7  | 2 | 5 | 3 | 2 | 1 | 3 | 4 | 2 | 2 |   |
| ERX2465578 | 2 | 5 | 4 | 2 | 1 | 2 | 3 | 4 | 3 | 2 | 5 | 2 | 3  | 2 | 3  | 2 | 6 | 2 | 2 | 1 | 3 | 4 | 2 | 3 |   |
| ERX2465524 | 2 | 5 | 3 | 3 | 1 | 2 | 2 | 4 | 3 | 2 | 5 | 2 | 3  | 2 | 3  | 2 | 5 | 2 | 2 | 1 | 3 | 4 | 2 | 3 |   |
| ERX2465375 | 2 | 5 | 3 | 3 | 1 | 3 | 2 | 4 | 3 | 2 | 7 | 2 | 3  | 2 | 5  | 2 | 5 | 2 | 2 | 1 | 3 | 4 | 2 | 3 |   |
| ERX2465201 | 2 | 8 | 3 | 5 | 3 | 5 | 4 | 2 | 4 | 2 | 3 | 4 | 2  | 4 | 8  | 2 | 7 | 3 | 2 | 1 | 3 | 4 | 2 | 3 |   |
| ERX2465562 | 2 | 5 | 3 | 5 | 3 | 3 | 2 | 3 | 3 | 4 | 3 | 2 | 5  | 2 | 7  | 2 | 3 | 2 | 1 | 1 | 3 | 2 | 2 | 3 |   |
| ERX2465301 | 2 | 1 | 2 | 5 | 1 | 3 | 1 | 4 | 3 | 4 | 3 | 3 | 1  | 3 | 7  | 2 | 5 | 2 | 2 | 1 | 3 | 4 | 2 | 3 |   |
| ERX2465685 | 2 | 4 | 3 | 6 | 4 | 3 | 4 | 2 | 4 | 2 | 3 | 4 | 2  | 6 | 6  | 2 | 5 | 3 | 2 | 1 | 3 | 4 | 2 | 3 |   |
| ERX2465386 | 2 | 3 | 3 | 3 | 3 | 3 | 2 | 4 | 3 | 2 | 3 | 2 | 4  | 2 | 5  | 1 | 5 | 2 | 1 | 1 | 3 | 4 | 2 | 3 |   |
| ERX2465196 | 2 | 6 | 3 | 5 | 3 | 3 | 2 | 3 | 3 | 3 | 3 | 3 | 4  | 2 | 7  | 2 | 3 | 2 | 2 | 1 | 3 | 2 | 2 | 3 |   |
| ERX2465226 | 2 | 7 | 4 | 4 | 3 | 4 | 2 | 4 | 2 | 2 | 3 | 2 | 3  | 2 | 5  | 2 | 6 | 2 | 2 | 1 | 3 | 4 | 2 | 3 |   |
| ERX2465480 | 2 | 6 | 5 | 3 | 1 | 4 | 2 | 4 | 2 | 2 | 3 | 2 | 2  | 2 | 6  | 2 | 5 | 2 | 2 | 1 | 3 | 4 | 2 | 3 |   |
| ERX2465388 | 3 | 5 | 2 | 2 | 3 | 3 | 2 | 3 | 5 | 4 | 2 | 1 | 2  | 3 | 5  | 2 | 4 | 2 | 2 | 2 | 3 | 3 | 4 | 1 |   |
| ERX2465643 | 3 | 6 | 4 | 3 | 3 | 3 | 3 | 4 | 3 | 2 | 3 | 2 | 2  | 1 | 0  | 2 | 6 | 2 | 2 | 1 | 3 | 4 | 2 | 3 |   |
| ERX2465554 | 4 | 2 | 3 | 4 | 3 | 4 | 2 | 4 | 2 | 1 | 4 | 1 | -2 | 7 | 4  | 2 | 7 | 3 | 2 | 2 | 3 | 3 | 1 | 3 |   |
| ERX2465250 | 2 | 5 | 3 | 4 | 3 | 3 | 2 | 3 | 3 | 4 | 1 | 3 | 4  | 3 | 7  | 2 | 5 | 2 | 2 | 1 | 3 | 4 | 2 | 2 |   |
| ERX2465280 | 2 | 2 | 3 | 5 | 2 | 3 | 2 | 3 | 4 | 4 | 3 | 3 | 3  | 3 | 6  | 2 | 5 | 2 | 2 | 1 | 3 | 4 | 2 | 3 |   |
| ERX2465620 | 2 | 1 | 2 | 5 | 1 | 3 | 1 | 4 | 2 | 4 | 3 | 3 | 1  | 3 | 7  | 2 | 5 | 2 | 2 | 1 | 3 | 4 | 2 | 3 |   |
| ERX2465570 | 4 | 5 | 4 | 3 | 3 | 3 | 2 | 4 | 3 | 2 | 3 | 2 | 3  | 2 | 3  | 2 | 6 | 2 | 2 | 1 | 3 | 4 | 2 | 3 |   |
| ERX2465311 | 2 | 2 | 3 | 5 | 2 | 3 | 2 | 3 | 4 | 4 | 3 | 3 | 3  | 3 | 6  | 2 | 5 | 2 | 2 | 1 | 3 | 4 | 2 | 3 |   |
| ERX2465321 | 3 | 2 | 2 | 4 | 3 | 4 | 2 | 4 | 4 | 2 | 2 | 1 | 8  | 4 | 7  | 2 | 6 | 2 | 2 | 2 | 3 | 3 | 6 | 3 |   |
| ERX2465510 | 2 | 5 | 3 | 5 | 3 | 3 | 1 | 3 | 3 | 4 | 3 | 3 | 6  | 3 | 7  | 2 | 3 | 2 | 2 | 1 | 3 | 2 | 2 | 3 |   |
| ERX2465238 | 2 | 5 | 3 | 5 | 3 | 3 | 2 | 3 | 3 | 4 | 3 | 3 | 5  | 3 | 5  | 2 | 5 | 2 | 2 | 1 | 3 | 4 | 2 | 3 |   |
| ERX2465329 | 2 | 7 | 3 | 6 | 4 | 5 | 2 | 2 | 4 | 2 | 3 | 1 | 2  | 4 | 8  | 2 | 5 | 3 | 2 | 1 | 3 | 4 | 2 | 3 |   |
| ERX2465415 | 2 | 4 | 2 | 4 | 3 | 3 | 3 | 4 | 2 | 1 | 2 | 3 | 2  | 3 | 9  | 1 | 6 | 2 | 2 | 1 | 3 | 4 | 2 | 3 |   |
| ERX2465189 | 2 | 5 | 2 | 3 | 3 | 3 | 1 | 4 | 2 | 2 | 3 | 2 | 4  | 2 | 5  | 2 | 5 | 2 | 2 | 1 | 3 | 4 | 2 | 3 |   |
| ERX2465616 | 7 | 2 | 2 | 4 | 2 | 4 | 1 | 4 | 3 | 2 | 2 | 1 | 9  | 9 | 7  | 2 | 6 | 3 | 2 | 2 | 3 | 3 | 4 | 3 |   |
| ERX2465590 | 2 | 6 | 3 | 4 | 3 | 3 | 2 | 3 | 3 | 4 | 3 | 3 | 3  | 3 | 5  | 2 | 3 | 2 | 2 | 1 | 3 | 2 | 2 | 3 |   |
| ERX2465414 | 2 | 5 | 3 | 6 | 4 | 5 | 3 | 2 | 4 | 2 | 3 | 4 | 2  | 4 | 7  | 2 | 5 | 3 | 2 | 1 | 3 | 4 | 2 | 3 |   |
| ERX2465518 | 2 | 5 | 3 | 6 | 3 | 3 | 2 | 3 | 3 | 4 | 3 | 3 | 5  | 3 | 5  | 2 | 5 | 2 | 2 | 1 | 3 | 4 | 2 | 3 |   |
| ERX2465446 | 9 | 2 | 3 | 4 | 2 | 5 | 2 | 4 | 7 | 2 | 4 | 1 | 2  | 5 | 6  | 3 | 5 | 3 | 2 | 2 | 3 | 3 | 4 | 3 |   |
| ERX2465416 | 2 | 5 | 3 | 3 | 3 | 3 | 2 | 4 | 4 | 2 | 9 | 2 | 5  | 3 | 5  | 2 | 5 | 2 | 1 | 1 | 3 | 4 | 2 | 3 |   |
| ERX2465439 | 2 | 6 | 1 | 4 | 2 | 2 | 4 | 4 | 1 | 1 | 2 | 2 | 2  | 3 | 4  | 2 | 6 | 2 | 2 | 1 | 3 | 4 | 2 | 2 |   |
| ERX2465159 | 2 | 5 | 3 | 4 | 2 | 3 | 4 | 2 | 2 | 2 | 1 | 2 | 3  | 3 | 6  | 2 | 6 | 2 | 2 | 1 | 2 | 4 | 2 | 1 |   |
| ERX2465654 | 2 | 4 | 4 | 3 | 1 | 2 | 2 | 5 | 3 | 2 | 5 | 2 | 4  | 2 | 5  | 2 | 5 | 2 | 2 | 1 | 3 | 4 | 2 | 3 |   |
| ERX2465484 | 2 | 7 | 3 | 5 | 4 | 5 | 5 | 2 | 4 | 2 | 3 | 4 | 2  | 4 | 8  | 2 | 5 | 3 | 2 | 1 | 3 | 4 | 2 | 3 |   |
| ERX2465344 | 2 | 5 | 1 | 3 | 3 | 3 | 2 | 4 | 4 | 2 | 2 | 2 | 6  | 3 | 5  | 2 | 5 | 2 | 1 | 1 | 3 | 4 | 2 | 3 |   |
| ERX2465666 | 2 | 1 | 4 | 7 | 4 | 4 | 4 | 2 | 4 | 2 | 2 | 4 | 2  | 3 | 5  | 2 | 5 | 3 | 2 | 1 | 3 | 4 | 2 | 3 |   |

|            |   |   |   |   |   |   |   |   |   |   |         |   |   |   |         |   |   |   |   |   |   |   |   |   |
|------------|---|---|---|---|---|---|---|---|---|---|---------|---|---|---|---------|---|---|---|---|---|---|---|---|---|
| ERX2465364 | 2 | 7 | 3 | 3 | 3 | 5 | 4 | 4 | 4 | 4 | 3       | 2 | 6 | 5 | 8       | 2 | 5 | 3 | 2 | 1 | 3 | 4 | 2 | 3 |
| ERX2465281 | 2 | 4 | 3 | 4 | 2 | 3 | 2 | 3 | 3 | 4 | 3       | 3 | 2 | 3 | 7       | 2 | 5 | 2 | 2 | 1 | 3 | 4 | 2 | 3 |
| ERX2465566 | 2 | 4 | 3 | 6 | 4 | 5 | 3 | 2 | 4 | 2 | 3       | 4 | 2 | 4 | 7       | 2 | 5 | 3 | 2 | 1 | 3 | 4 | 2 | 3 |
| ERX2465612 | 2 | 1 | 4 | 7 | 4 | 4 | 4 | 2 | 4 | 2 | 2       | 4 | 2 | 3 | 5       | 2 | 5 | 3 | 2 | 1 | 3 | 4 | 2 | 3 |
| ERX2465667 | 2 | 5 | 1 | 5 | 3 | 3 | 2 | 3 | 3 | 4 | 1       | 3 | 4 | 3 | 7       | 2 | 6 | 2 | 2 | 1 | 3 | 4 | 2 | 3 |
| ERX2465681 | 2 | 1 | 4 | 7 | 4 | 4 | 5 | 2 | 3 | 2 | 2       | 1 | 2 | 3 | 5       | 2 | 5 | 3 | 1 | 1 | 2 | 4 | 2 | 2 |
| ERX2465285 | 6 | 2 | 3 | 4 | 2 | 5 | 2 | 4 | 6 | 2 | 3       | 1 | 2 | 5 | 6       | 3 | 5 | 3 | 2 | 2 | 3 | 3 | 4 | 3 |
| ERX2465350 | 2 | 8 | 3 | 5 | 6 | 5 | 4 | 2 | 4 | 4 | 3       | 4 | 2 | 4 | 3       | 2 | 5 | 3 | 2 | 1 | 3 | 4 | 2 | 3 |
| ERX2465241 | 2 | 5 | 3 | 6 | 5 | 5 | 3 | 2 | 4 | 2 | 3       | 4 | 2 | 4 | 7       | 2 | 5 | 3 | 2 | 1 | 3 | 4 | 2 | 3 |
| ERX2465592 | 5 | 2 | 3 | 4 | 3 | 5 | 2 | 4 | 8 | 2 | 8       | 1 | 2 | 7 | 4       | 2 | 5 | 3 | 2 | 2 | 1 | 3 | 3 | 3 |
| ERX2465611 | 2 | 1 | 2 | 5 | 1 | 3 | 1 | 4 | 3 | 4 | 3       | 3 | 2 | 3 | 9       | 2 | 5 | 2 | 1 | 1 | 3 | 4 | 2 | 3 |
| ERX2465532 | 3 | 5 | 2 | 5 | 3 | 3 | 2 | 3 | 3 | 4 | 3       | 3 | 5 | 3 | 6       | 2 | 5 | 2 | 2 | 1 | 3 | 4 | 2 | 3 |
| ERX2465166 | 2 | 7 | 3 | 5 | 4 | 5 | 5 | 2 | 4 | 2 | 3       | 4 | 2 | 6 | 8       | 2 | 5 | 3 | 2 | 1 | 3 | 4 | 2 | 3 |
| ERX2465404 | 2 | 7 | 3 | 6 | 4 | 4 | 4 | 2 | 4 | 4 | 4       | 4 | 2 | 4 | 7       | 2 | 5 | 2 | 2 | 1 | 3 | 4 | 2 | 3 |
| ERX2465433 | 2 | 5 | 1 | 5 | 2 | 3 | 4 | 3 | 3 | 6 | 3       | 3 | 2 | 3 | 2       | 2 | 1 | 2 | 1 | 1 | 3 | 4 | 2 | 2 |
| ERX2465432 | 2 | 4 | 4 | 7 | 4 | 6 | 1 | 2 | 4 | 2 | 3       | 4 | 2 | 4 | 7       | 2 | 5 | 3 | 2 | 1 | 3 | 4 | 2 | 3 |
| ERX2465356 | 2 | 5 | 2 | 3 | 4 | 3 | 2 | 4 | 2 | 2 | 3       | 2 | 2 | 2 | 5       | 2 | 5 | 2 | 2 | 1 | 3 | 4 | 2 | 3 |
| ERX2465214 | 2 | 8 | 3 | 5 | 5 | 5 | 4 | 2 | 4 | 4 | 3       | 4 | 2 | 4 | 3       | 2 | 5 | 3 | 2 | 1 | 3 | 4 | 2 | 3 |
| ERX2465218 | 2 | 7 | 3 | 3 | 3 | 5 | 4 | 4 | 4 | 3 | 3       | 2 | 3 | 5 | 8       | 2 | 5 | 3 | 2 | 1 | 3 | 4 | 2 | 3 |
| ERX2465451 | 2 | 5 | 3 | 5 | 3 | 2 | 2 | 3 | 3 | 4 | 3       | 3 | 4 | 3 | 7       | 2 | 3 | 2 | 2 | 1 | 3 | 2 | 2 | 3 |
| ERX2465284 | 2 | 1 | 2 | 5 | 1 | 3 | 1 | 4 | 3 | 4 | 3       | 3 | 2 | 3 | 8       | 2 | 5 | 2 | 2 | 1 | 3 | 4 | 2 | 3 |
| ERX2465225 | 2 | 2 | 4 | 4 | 2 | 2 | 3 | 2 | 2 | 1 | 2       | 2 | 2 | 3 | 4       | 1 | 3 | 2 | 2 | 1 | 3 | 4 | 2 | 3 |
| ERX2465419 | 2 | 5 | 4 | 3 | 1 | 2 | 2 | 4 | 2 | 2 | 3       | 2 | 4 | 2 | 4       | 2 | 5 | 2 | 2 | 1 | 2 | 4 | 2 | 3 |
| ERX2465606 | 2 | 5 | 4 | 3 | 3 | 3 | 2 | 4 | 3 | 2 | 3       | 2 | 3 | 2 | 5       | 2 | 6 | 2 | 2 | 1 | 3 | 4 | 2 | 3 |
| ERX2465328 | 2 | 2 | 4 | 3 | 1 | 3 | 2 | 4 | 3 | 2 | 2       | 2 | 3 | 2 | 5       | 2 | 5 | 2 | 2 | 1 | 3 | 4 | 2 | 3 |
| ERX2465488 | 2 | 6 | 3 | 1 | 3 | 5 | 4 | 4 | 3 | 4 | 3       | 4 | 6 | 4 | 8       | 2 | 5 | 3 | 2 | 1 | 3 | 4 | 2 | 3 |
| ERX2465639 | 3 | 6 | 2 | 2 | 3 | 3 | 2 | 4 | 4 | 2 | 1       | 2 | 5 | 1 | 5       | 2 | 5 | 2 | 2 | 1 | 2 | 4 | 2 | 3 |
| ERX2465183 | 2 | 5 | 2 | 4 | 3 | 2 | 1 | 4 | 2 | 2 | 3       | 2 | 4 | 2 | 3       | 2 | 5 | 2 | 2 | 1 | 2 | 5 | 2 | 3 |
| ERX2465478 | 2 | 5 | 2 | 3 | 3 | 3 | 1 | 4 | 4 | 2 | 4       | 2 | 2 | 3 | 3       | 2 | 3 | 2 | 2 | 1 | 3 | 4 | 2 | 2 |
| ERX2465464 | 3 | 5 | 2 | 2 | 3 | 3 | 2 | 5 | 5 | 4 | 3       | 1 | 2 | 2 | 5       | 2 | 4 | 2 | 2 | 2 | 3 | 3 | 3 | 3 |
| ERX2465644 | 2 | 4 | 1 | 4 | 1 | 3 | 4 | 4 | 2 | 1 | 2       | 2 | 3 | 3 | 7       | 2 | 6 | 2 | 2 | 1 | 2 | 2 | 1 | 5 |
| ERX2465202 | 2 | 3 | 4 | 4 | 3 | 3 | 4 | 4 | 2 | 2 | 1       | 2 | 2 | 2 | 6       | 2 | 1 | 2 | 2 | 1 | 3 | 4 | 2 | 1 |
| ERX2465212 | 2 | 1 | 2 | 5 | 1 | 3 | 1 | 4 | 3 | 6 | 3       | 3 | 1 | 3 | 7       | 2 | 5 | 2 | 2 | 1 | 3 | 4 | 2 | 3 |
| ERX2465670 | 2 | 4 | 3 | 2 | 3 | 3 | 2 | 4 | 3 | 2 | 3       | 2 | 2 | 5 | 7       | 2 | 5 | 2 | 2 | 1 | 3 | 2 | 1 | 2 |
| ERX2465406 | 2 | 5 | 5 | 4 | 3 | 3 | 3 | 4 | 3 | 2 | 3       | 2 | 3 | 2 | 3       | 2 | 5 | 2 | 2 | 1 | 3 | 4 | 2 | 3 |
| ERX2465299 | 2 | 5 | 2 | 3 | 2 | 3 | 1 | 5 | 4 | 2 | 2       | 2 | 2 | 3 | 4       | 2 | 5 | 2 | 2 | 1 | 3 | 4 | 2 | 3 |
| ERX2465501 | 3 | 5 | 2 | 2 | 3 | 2 | 2 | 3 | 6 | 4 | 2       | 1 | 2 | 3 | 5       | 2 | 4 | 2 | 2 | 2 | 3 | 3 | 5 | 3 |
| ERX2465511 | 5 | 2 | 3 | 4 | 3 | 2 | 2 | 3 | 9 | 2 | 4       | 1 | 6 | 3 | 5       | 2 | 6 | 3 | 2 | 2 | 3 | 3 | 3 | 3 |
| ERX2465157 | 2 | 6 | 3 | 4 | 3 | 3 | 2 | 3 | 3 | 4 | 3       | 3 | 3 | 3 | 5       | 2 | 3 | 2 | 2 | 1 | 3 | 2 | 2 | 3 |
| ERX2465519 | 2 | 5 | 3 | 6 | 4 | 5 | 3 | 2 | 4 | 2 | 3       | 4 | 2 | 4 | 7       | 2 | 5 | 3 | 2 | 1 | 3 | 4 | 2 | 3 |
| ERX2465232 | 2 | 5 | 3 | 6 | 4 | 5 | 3 | 2 | 4 | 2 | 3       | 4 | 2 | 4 | 7       | 2 | 5 | 3 | 2 | 1 | 3 | 4 | 2 | 3 |
| ERX2465663 | 5 | 2 | 2 | 5 | 3 | 4 | 1 | 4 | 4 | 2 | 2       | 1 | 8 | 0 | 7       | 2 | 6 | 3 | 2 | 2 | 3 | 3 | 6 | 3 |
| ERX2465167 | 2 | 4 | 3 | 3 | 3 | 3 | 2 | 3 | 2 | 4 | 3       | 4 | 2 | 3 | 7       | 2 | 5 | 2 | 2 | 1 | 3 | 4 | 2 | 3 |
| ERX2465462 | 2 | 5 | 4 | 5 | 3 | 3 | 2 | 3 | 3 | 4 | 3       | 3 | 3 | 3 | 5,<br>5 | 2 | 5 | 2 | 2 | 1 | 3 | 4 | 2 | 3 |
| ERX2465627 | 2 | 4 | 3 | 3 | 3 | 3 | 2 | 3 | 3 | 4 | 5,<br>5 | 3 | 2 | 3 | 7       | 2 | 5 | 2 | 2 | 1 | 3 | 4 | 2 | 3 |
| ERX2465308 | 2 | 5 | 2 | 5 | 4 | 5 | 3 | 2 | 4 | 2 | 4       | 4 | 2 | 4 | 7       | 2 | 5 | 3 | 2 | 1 | 3 | 4 | 2 | 3 |

|            |   |   |   |   |   |   |   |   |   |   |   |   |   |   |   |   |   |   |   |   |   |   |         |   |
|------------|---|---|---|---|---|---|---|---|---|---|---|---|---|---|---|---|---|---|---|---|---|---|---------|---|
| ERX2465661 | 2 | 5 | 3 | 5 | 3 | 3 | 2 | 4 | 3 | 4 | 3 | 3 | 4 | 3 | 6 | 2 | 3 | 2 | 1 | 1 | 3 | 2 | 2       | 3 |
| ERX2465626 | 3 | 5 | 2 | 2 | 3 | 3 | 2 | 5 | 3 | 4 | 2 | 1 | 4 | 3 | 5 | 2 | 4 | 2 | 2 | 2 | 3 | 3 | 5       | 3 |
| ERX2465581 | 2 | 5 | 3 | 6 | 4 | 5 | 3 | 2 | 4 | 2 | 6 | 4 | 2 | 4 | 7 | 2 | 5 | 3 | 2 | 1 | 3 | 4 | 2       | 3 |
| ERX2465655 | 4 | 2 | 2 | 4 | 2 | 6 | 2 | 4 | 7 | 2 | 2 | 1 | 5 | 4 | 7 | 2 | 6 | 2 | 2 | 2 | 3 | 3 | 6,<br>5 | 3 |
| ERX2465500 | 2 | 4 | 4 | 3 | 1 | 2 | 2 | 5 | 3 | 2 | 5 | 2 | 4 | 2 | 5 | 2 | 5 | 2 | 2 | 1 | 3 | 4 | 2       | 3 |
| ERX2465237 | 2 | 7 | 3 | 4 | 4 | 5 | 5 | 2 | 4 | 2 | 3 | 2 | 2 | 4 | 8 | 2 | 5 | 3 | 2 | 1 | 3 | 4 | 2       | 3 |
| ERX2465669 | 2 | 5 | 4 | 5 | 3 | 3 | 2 | 3 | 3 | 4 | 2 | 3 | 6 | 3 | 7 | 2 | 3 | 2 | 2 | 1 | 3 | 2 | 2       | 3 |
| ERX2465517 | 2 | 6 | 1 | 3 | 3 | 3 | 3 | 3 | 3 | 4 | 2 | 3 | 4 | 2 | 6 | 2 | 5 | 2 | 2 | 1 | 3 | 4 | 3       | 3 |
| ERX2465605 | 4 | 2 | 3 | 4 | 4 | 5 | 2 | 4 | 8 | 2 | 3 | 1 | 8 | 6 | 5 | 2 | 8 | 3 | 2 | 2 | 3 | 3 | 4       | 3 |
| ERX2465447 | 2 | 7 | 3 | 3 | 3 | 5 | 4 | 4 | 4 | 4 | 3 | 2 | 6 | 5 | 8 | 2 | 5 | 4 | 2 | 1 | 3 | 4 | 2       | 3 |
| ERX2465460 | 5 | 2 | 2 | 4 | 3 | 4 | 1 | 4 | 4 | 2 | 2 | 1 | 8 | 7 | 7 | 2 | 6 | 3 | 2 | 2 | 3 | 3 | 6,<br>5 | 3 |
| ERX2465267 | 2 | 5 | 4 | 3 | 3 | 3 | 2 | 4 | 3 | 2 | 3 | 2 | 2 | 2 | 5 | 2 | 6 | 2 | 2 | 1 | 3 | 4 | 2       | 3 |
| ERX2465521 | 2 | 4 | 3 | 3 | 3 | 3 | 2 | 4 | 4 | 2 | 2 | 2 | 4 | 3 | 5 | 2 | 5 | 2 | 1 | 1 | 3 | 4 | 2       | 2 |
| ERX2465650 | 2 | 3 | 3 | 6 | 4 | 5 | 3 | 2 | 3 | 2 | 3 | 4 | 2 | 4 | 7 | 2 | 5 | 3 | 2 | 1 | 3 | 4 | 2       | 3 |
| ERX2465651 | 2 | 5 | 3 | 5 | 3 | 3 | 3 | 3 | 3 | 4 | 3 | 3 | 5 | 3 | 6 | 2 | 5 | 2 | 2 | 1 | 3 | 5 | 2       | 3 |
| ERX2465378 | 2 | 7 | 3 | 6 | 4 | 5 | 4 | 2 | 4 | 2 | 3 | 4 | 2 | 4 | 8 | 2 | 5 | 3 | 2 | 1 | 3 | 4 | 2       | 3 |
| ERX2465191 | 2 | 7 | 3 | 6 | 4 | 5 | 4 | 2 | 4 | 2 | 3 | 4 | 2 | 4 | 8 | 1 | 5 | 3 | 2 | 1 | 3 | 4 | 2       | 3 |
| ERX2465630 | 2 | 5 | 6 | 4 | 3 | 3 | 3 | 4 | 2 | 1 | 2 | 1 | 2 | 2 | 3 | 1 | 6 | 2 | 2 | 1 | 3 | 4 | 2       | 3 |
| ERX2465630 | 2 | 7 | 6 | 4 | 3 | 3 | 3 | 4 | 2 | 1 | 2 | 1 | 2 | 2 | 3 | 1 | 6 | 2 | 2 | 1 | 3 | 4 | 2       | 3 |
| ERX2465469 | 2 | 1 | 2 | 0 | 2 | 2 | 2 | 4 | 4 | 4 | 3 | 2 | 2 | 3 | 7 | 2 | 1 | 2 | 2 | 1 | 3 | 4 | 2       | 3 |
| ERX2465574 | 0 | 5 | 3 | 3 | 3 | 3 | 2 | 4 | 3 | 2 | 3 | 2 | 3 | 2 | 5 | 2 | 6 | 2 | 2 | 1 | 3 | 4 | 2       | 3 |
| ERX2465352 | 2 | 5 | 1 | 3 | 3 | 3 | 2 | 4 | 3 | 2 | 5 | 2 | 2 | 2 | 4 | 2 | 6 | 2 | 2 | 1 | 3 | 4 | 2       | 3 |
| ERX2465257 | 2 | 5 | 2 | 3 | 1 | 3 | 2 | 4 | 3 | 2 | 2 | 2 | 2 | 2 | 5 | 2 | 5 | 2 | 2 | 1 | 3 | 4 | 2       | 3 |
| ERX2465569 | 2 | 1 | 2 | 5 | 1 | 3 | 1 | 4 | 3 | 5 | 3 | 3 | 1 | 3 | 7 | 2 | 5 | 2 | 2 | 1 | 3 | 4 | 2       | 3 |
| ERX2465298 | 2 | 5 | 3 | 6 | 4 | 5 | 3 | 2 | 4 | 2 | 3 | 4 | 2 | 4 | 7 | 2 | 5 | 3 | 2 | 1 | 3 | 4 | 2       | 3 |
| ERX2465545 | 2 | 5 | 3 | 5 | 3 | 3 | 2 | 3 | 2 | 4 | 3 | 3 | 5 | 3 | 7 | 2 | 6 | 2 | 2 | 1 | 3 | 4 | 2       | 3 |
| ERX2465679 | 2 | 1 | 2 | 5 | 1 | 3 | 1 | 4 | 3 | 4 | 3 | 3 | 2 | 3 | 5 | 2 | 5 | 2 | 2 | 1 | 3 | 4 | 2       | 3 |
| ERX2465682 | 2 | 5 | 2 | 3 | 3 | 2 | 3 | 4 | 2 | 1 | 2 | 2 | 2 | 3 | 7 | 1 | 6 | 2 | 2 | 1 | 3 | 4 | 2       | 4 |
| ERX2465515 | 2 | 7 | 3 | 5 | 4 | 5 | 5 | 2 | 3 | 2 | 3 | 4 | 2 | 4 | 8 | 2 | 5 | 3 | 2 | 1 | 3 | 4 | 2       | 3 |
| ERX2465657 | 2 | 5 | 3 | 6 | 3 | 5 | 4 | 2 | 4 | 2 | 4 | 4 | 2 | 4 | 2 | 2 | 5 | 3 | 2 | 1 | 3 | 4 | 2       | 3 |
| ERX2465272 | 2 | 4 | 1 | 2 | 4 | 3 | 2 | 4 | 3 | 2 | 3 | 2 | 3 | 3 | 5 | 2 | 5 | 2 | 1 | 1 | 3 | 3 | 2       | 3 |
| ERX2465602 | 2 | 7 | 3 | 4 | 3 | 5 | 4 | 2 | 4 | 2 | 3 | 4 | 2 | 4 | 7 | 2 | 5 | 3 | 2 | 1 | 3 | 4 | 2       | 3 |
| ERX2465535 | 2 | 5 | 3 | 5 | 3 | 3 | 2 | 4 | 3 | 4 | 3 | 3 | 4 | 3 | 6 | 2 | 3 | 2 | 1 | 1 | 3 | 2 | 2       | 3 |
| ERX2465452 | 2 | 5 | 3 | 7 | 4 | 6 | 1 | 2 | 4 | 2 | 3 | 4 | 2 | 4 | 7 | 2 | 5 | 3 | 2 | 1 | 3 | 4 | 2       | 3 |
| ERX2465617 | 2 | 7 | 3 | 3 | 3 | 3 | 4 | 4 | 3 | 4 | 3 | 4 | 6 | 4 | 7 | 2 | 5 | 3 | 2 | 1 | 3 | 4 | 2       | 3 |
| ERX2465690 | 2 | 5 | 3 | 5 | 3 | 3 | 2 | 3 | 3 | 4 | 3 | 3 | 3 | 3 | 5 | 2 | 6 | 2 | 2 | 1 | 3 | 4 | 2       | 3 |
| ERX2465382 | 2 | 5 | 4 | 4 | 2 | 3 | 4 | 2 | 2 | 2 | 1 | 2 | 3 | 2 | 6 | 2 | 6 | 1 | 2 | 1 | 3 | 4 | 2       | 1 |
| ERX2465351 | 2 | 5 | 3 | 6 | 4 | 5 | 3 | 2 | 4 | 2 | 3 | 4 | 2 | 4 | 7 | 2 | 5 | 3 | 2 | 1 | 3 | 4 | 2       | 3 |
| ERX2465274 | 2 | 5 | 2 | 5 | 4 | 3 | 2 | 3 | 3 | 4 | 3 | 1 | 3 | 3 | 5 | 2 | 5 | 2 | 2 | 1 | 3 | 4 | 2       | 3 |
| ERX2465316 | 2 | 5 | 3 | 7 | 4 | 5 | 3 | 2 | 4 | 2 | 2 | 4 | 2 | 4 | 7 | 2 | 5 | 3 | 2 | 1 | 3 | 4 | 2       | 3 |
| ERX2465217 | 2 | 1 | 4 | 7 | 4 | 4 | 4 | 2 | 4 | 2 | 2 | 4 | 2 | 3 | 5 | 2 | 5 | 3 | 2 | 1 | 3 | 4 | 2       | 3 |
| ERX2465249 | 2 | 5 | 6 | 4 | 3 | 3 | 4 | 4 | 2 | 2 | 5 | 2 | 2 | 4 | 8 | 2 | 5 | 2 | 2 | 1 | 3 | 4 | 2       | 3 |
| ERX2465290 | 2 | 5 | 3 | 5 | 3 | 3 | 2 | 3 | 3 | 4 | 3 | 3 | 5 | 3 | 7 | 2 | 3 | 2 | 2 | 1 | 3 | 2 | 2       | 3 |
| ERX2465164 | 2 | 1 | 4 | 7 | 4 | 4 | 4 | 2 | 4 | 2 | 2 | 4 | 2 | 3 | 5 | 2 | 5 | 3 | 2 | 1 | 3 | 4 | 2       | 3 |
| ERX2465403 | 5 | 2 | 3 | 3 | 5 | 4 | 2 | 4 | 9 | 2 | 6 | 1 | 2 | 2 | 5 | 2 | 5 | 3 | 2 | 2 | 3 | 3 | 4       | 3 |
| ERX2465348 | 5 | 2 | 2 | 4 | 2 | 5 | 2 | 4 | 7 | 2 | 2 | 1 | 7 | 9 | 8 | 2 | 6 | 2 | 2 | 2 | 3 | 3 | 5       | 3 |

|            |        |   |   |   |   |   |   |   |   |   |   |   |   |   |   |   |   |   |   |   |   |   |   |   |   |
|------------|--------|---|---|---|---|---|---|---|---|---|---|---|---|---|---|---|---|---|---|---|---|---|---|---|---|
| ERX2465248 | 2      | 5 | 4 | 3 | 1 | 3 | 2 | 4 | 3 | 2 | 1 | 2 | 2 | 2 | 4 | 2 | 5 | 2 | 2 | 1 | 3 | 4 | 2 | 3 |   |
| ERX2465224 | 1      | 1 | 2 | 5 | 1 | 3 | 4 | 4 | 3 | 4 | 3 | 3 | 2 | 3 | 7 | 2 | 5 | 2 | 2 | 1 | 3 | 4 | 2 | 3 |   |
| ERX2465240 | 5      | 2 | 2 | 4 | 3 | 4 | 1 | 4 | 4 | 2 | 2 | 1 | 1 | 0 | 8 | 2 | 6 | 3 | 2 | 2 | 3 | 3 | 6 | 3 |   |
| ERX2465542 | 2      | 5 | 1 | 4 | 3 | 3 | 4 | 4 | 2 | 2 | 2 | 2 | 3 | 2 | 6 | 2 | 6 | 2 | 2 | 1 | 3 | 4 | 2 | 3 |   |
| ERX2465402 | 2      | 5 | 3 | 6 | 4 | 5 | 3 | 2 | 4 | 2 | 3 | 4 | 2 | 4 | 7 | 2 | 5 | 3 | 2 | 1 | 3 | 4 | 2 | 3 |   |
| ERX2465193 | 2      | 5 | 4 | 5 | 3 | 3 | 2 | 3 | 3 | 3 | 4 | 3 | 6 | 3 | 7 | 2 | 3 | 2 | 2 | 1 | 3 | 2 | 2 | 3 |   |
| ERX2465370 | 1<br>/ | 5 | 5 | 6 | 4 | 3 | 3 | 4 | 3 | 3 | 6 | 3 | 1 | 4 | 4 | 8 | 2 | 5 | 2 | 2 | 1 | 3 | 4 | 2 | 3 |
| ERX2465467 | 2      | 5 | 3 | 3 | 2 | 5 | 4 | 4 | 4 | 4 | 3 | 2 | 6 | 4 | 8 | 2 | 5 | 3 | 2 | 1 | 1 | 4 | 2 | 3 |   |
| ERX2465558 | 2      | 5 | 3 | 3 | 3 | 4 | 2 | 3 | 4 | 2 | 5 | 2 | 2 | 3 | 9 | 2 | 5 | 2 | 2 | 1 | 3 | 4 | 2 | 3 |   |
| ERX2465656 | 2      | 8 | 2 | 4 | 3 | 4 | 4 | 4 | 2 | 2 | 5 | 2 | 3 | 2 | 5 | 2 | 4 | 2 | 2 | 1 | 3 | 4 | 2 | 3 |   |
| ERX2465381 | 2      | 7 | 3 | 3 | 3 | 5 | 4 | 4 | 4 | 4 | 3 | 2 | 5 | 5 | 8 | 2 | 5 | 3 | 2 | 1 | 3 | 4 | 2 | 3 |   |
| ERX2465561 | 2      | 1 | 2 | 5 | 1 | 3 | 1 | 2 | 3 | 4 | 3 | 3 | 2 | 3 | 8 | 2 | 5 | 2 | 2 | 1 | 3 | 4 | 2 | 3 |   |
| ERX2465295 | 2      | 3 | 6 | 4 | 3 | 3 | 3 | 4 | 2 | 1 | 2 | 3 | 2 | 2 | 8 | 1 | 6 | 2 | 2 | 1 | 3 | 4 | 2 | 3 |   |
| ERX2465459 | 3      | 5 | 4 | 5 | 3 | 2 | 2 | 3 | 3 | 4 | 4 | 3 | 4 | 3 | 7 | 2 | 5 | 2 | 1 | 1 | 3 | 2 | 2 | 3 |   |
| ERX2465342 | 2      | 5 | 3 | 6 | 4 | 6 | 1 | 2 | 4 | 2 | 3 | 4 | 2 | 3 | 4 | 2 | 5 | 3 | 2 | 1 | 3 | 4 | 2 | 3 |   |
| ERX2465613 | 2      | 1 | 2 | 7 | 2 | 2 | 3 | 4 | 3 | 4 | 3 | 3 | 2 | 3 | 3 | 2 | 5 | 2 | 2 | 1 | 3 | 4 | 2 | 3 |   |
| ERX2465243 | 2      | 7 | 3 | 6 | 4 | 4 | 4 | 2 | 4 | 4 | 4 | 4 | 2 | 3 | 7 | 2 | 5 | 2 | 1 | 1 | 3 | 4 | 2 | 3 |   |
| ERX2465421 | 2      | 5 | 3 | 6 | 4 | 5 | 3 | 2 | 4 | 2 | 3 | 4 | 2 | 4 | 7 | 2 | 5 | 3 | 2 | 1 | 3 | 4 | 2 | 3 |   |
| ERX2465252 | 2      | 7 | 1 | 3 | 3 | 5 | 2 | 4 | 4 | 4 | 3 | 2 | 6 | 6 | 8 | 2 | 5 | 3 | 2 | 1 | 3 | 4 | 2 | 3 |   |
| ERX2465265 | 2      | 5 | 3 | 5 | 3 | 2 | 3 | 3 | 3 | 4 | 3 | 3 | 2 | 3 | 6 | 2 | 6 | 2 | 2 | 1 | 3 | 4 | 2 | 3 |   |
| ERX2465499 | 2      | 5 | 3 | 6 | 4 | 5 | 4 | 2 | 4 | 2 | 3 | 4 | 2 | 4 | 7 | 2 | 5 | 3 | 2 | 1 | 3 | 4 | 2 | 3 |   |
| ERX2465354 | 2      | 1 | 2 | 5 | 1 | 3 | 1 | 4 | 3 | 4 | 3 | 3 | 1 | 3 | 8 | 2 | 5 | 2 | 2 | 1 | 3 | 4 | 2 | 3 |   |
| ERX2465423 | 5      | 2 | 2 | 4 | 3 | 4 | 1 | 4 | 4 | 2 | 2 | 1 | 8 | 0 | 7 | 2 | 6 | 3 | 2 | 2 | 3 | 3 | 4 | 3 |   |
| ERX2465297 | 2      | 5 | 3 | 6 | 3 | 5 | 3 | 2 | 2 | 2 | 5 | 4 | 2 | 4 | 7 | 2 | 5 | 3 | 2 | 1 | 3 | 4 | 2 | 3 |   |
| ERX2465680 | 5      | 2 | 2 | 4 | 2 | 6 | 1 | 4 | 7 | 2 | 2 | 1 | 5 | 4 | 7 | 2 | 6 | 2 | 2 | 2 | 3 | 3 | 6 | 3 |   |
| ERX2465385 | 3      | 5 | 5 | 3 | 2 | 3 | 1 | 4 | 3 | 2 | 3 | 2 | 4 | 1 | 6 | 2 | 5 | 2 | 2 | 1 | 3 | 4 | 2 | 2 |   |
| ERX2465527 | 2      | 5 | 2 | 4 | 3 | 2 | 3 | 4 | 2 | 1 | 2 | 2 | 2 | 3 | 6 | 1 | 6 | 2 | 2 | 1 | 3 | 4 | 2 | 3 |   |
| ERX2465182 | 2      | 5 | 1 | 3 | 1 | 4 | 5 | 4 | 2 | 1 | 2 | 2 | 2 | 3 | 7 | 2 | 8 | 2 | 2 | 1 | 2 | 4 | 1 | 5 |   |
| ERX2465179 | 2      | 5 | 4 | 3 | 3 | 3 | 2 | 4 | 3 | 2 | 3 | 2 | 3 | 2 | 5 | 2 | 6 | 2 | 2 | 1 | 3 | 4 | 2 | 3 |   |
| ERX2465425 | 2      | 5 | 2 | 3 | 4 | 2 | 2 | 4 | 2 | 2 | 4 | 2 | 4 | 2 | 2 | 2 | 5 | 2 | 2 | 1 | 3 | 4 | 2 | 3 |   |
| ERX2465271 | 2      | 7 | 3 | 4 | 3 | 4 | 4 | 2 | 3 | 2 | 3 | 2 | 2 | 4 | 7 | 2 | 5 | 3 | 2 | 1 | 3 | 4 | 2 | 2 |   |
| ERX2465493 | 2      | 5 | 3 | 4 | 3 | 3 | 4 | 4 | 2 | 2 | 1 | 2 | 4 | 3 | 6 | 2 | 6 | 2 | 2 | 1 | 2 | 4 | 2 | 1 |   |
| ERX2465277 | 2      | 1 | 4 | 7 | 4 | 4 | 4 | 2 | 4 | 2 | 2 | 4 | 2 | 3 | 5 | 2 | 5 | 3 | 2 | 1 | 3 | 4 | 2 | 3 |   |
| ERX2465332 | 2      | 7 | 2 | 6 | 4 | 5 | 8 | 2 | 3 | 2 | 3 | 4 | 2 | 4 | 8 | 2 | 5 | 3 | 2 | 1 | 3 | 4 | 2 | 3 |   |
| ERX2465426 | 1      | 5 | 3 | 3 | 3 | 3 | 1 | 4 | 3 | 2 | 3 | 2 | 2 | 3 | 1 | 2 | 5 | 2 | 1 | 1 | 2 | 3 | 2 | 3 |   |
| ERX2465599 | 2      | 7 | 3 | 6 | 4 | 4 | 4 | 2 | 2 | 4 | 4 | 4 | 2 | 4 | 7 | 2 | 5 | 2 | 2 | 1 | 3 | 4 | 2 | 3 |   |
| ERX2465560 | 2      | 7 | 3 | 3 | 3 | 5 | 4 | 4 | 4 | 4 | 3 | 2 | 6 | 5 | 7 | 2 | 5 | 3 | 2 | 1 | 3 | 4 | 2 | 3 |   |
| ERX2465353 | 2      | 3 | 3 | 6 | 4 | 5 | 3 | 2 | 3 | 2 | 3 | 4 | 2 | 4 | 7 | 2 | 5 | 3 | 2 | 1 | 3 | 4 | 2 | 3 |   |
| ERX2465172 | 2      | 1 | 2 | 6 | 2 | 2 | 3 | 4 | 3 | 4 | 3 | 3 | 2 | 3 | 8 | 2 | 5 | 2 | 2 | 1 | 3 | 4 | 2 | 3 |   |
| ERX2465483 | 2      | 4 | 2 | 3 | 3 | 3 | 1 | 5 | 3 | 2 | 4 | 2 | 3 | 3 | 3 | 2 | 5 | 1 | 2 | 1 | 3 | 4 | 2 | 2 |   |
| ERX2465494 | 2      | 5 | 4 | 5 | 3 | 3 | 2 | 3 | 3 | 4 | 3 | 3 | 7 | 3 | 7 | 2 | 6 | 2 | 2 | 1 | 3 | 4 | 2 | 3 |   |
| ERX2465325 | 2      | 5 | 3 | 3 | 3 | 5 | 4 | 4 | 4 | 4 | 3 | 2 | 6 | 5 | 8 | 2 | 5 | 3 | 2 | 1 | 3 | 4 | 2 | 3 |   |
| ERX2465291 | 2      | 4 | 2 | 3 | 4 | 3 | 2 | 4 | 2 | 2 | 3 | 2 | 4 | 2 | 5 | 2 | 5 | 2 | 2 | 1 | 1 | 4 | 2 | 3 |   |
| ERX2465322 | 2      | 4 | 4 | 6 | 4 | 6 | 1 | 2 | 4 | 2 | 3 | 4 | 2 | 6 | 7 | 2 | 5 | 3 | 2 | 1 | 3 | 4 | 2 | 3 |   |
| ERX2465552 | 2      | 4 | 4 | 3 | 3 | 3 | 2 | 4 | 3 | 2 | 2 | 2 | 3 | 2 | 3 | 2 | 5 | 2 | 2 | 1 | 3 | 4 | 2 | 3 |   |
| ERX2465178 | 2      | 1 | 4 | 7 | 4 | 3 | 4 | 2 | 4 | 2 | 2 | 4 | 2 | 3 | 5 | 2 | 5 | 3 | 2 | 1 | 3 | 4 | 2 | 3 |   |

|            |   |   |   |   |   |   |   |   |   |   |   |   |   |   |   |   |   |   |   |   |   |   |   |   |
|------------|---|---|---|---|---|---|---|---|---|---|---|---|---|---|---|---|---|---|---|---|---|---|---|---|
| ERX2465598 | 2 | 5 | 3 | 5 | 3 | 3 | 2 | 3 | 3 | 4 | 3 | 3 | 5 | 3 | 5 | 2 | 5 | 2 | 2 | 1 | 3 | 4 | 2 | 3 |
| ERX2465435 | 2 | 5 | 3 | 5 | 2 | 3 | 2 | 3 | 3 | 4 | 4 | 3 | 6 | 4 | 7 | 2 | 5 | 2 | 2 | 1 | 3 | 4 | 2 | 3 |
| ERX2465604 | 2 | 7 | 3 | 3 | 3 | 5 | 4 | 4 | 3 | 2 | 3 | 2 | 5 | 6 | 8 | 2 | 5 | 3 | 2 | 1 | 3 | 4 | 2 | 3 |
| ERX2465475 | 5 | 2 | 2 | 4 | 3 | 4 | 1 | 4 | 4 | 2 | 2 | 1 | 8 | 0 | 7 | 2 | 6 | 3 | 2 | 2 | 3 | 3 | 6 | 3 |
| ERX2465658 | 3 | 6 | 4 | 3 | 3 | 3 | 3 | 4 | 3 | 2 | 3 | 2 | 2 | 1 | 0 | 2 | 6 | 2 | 2 | 1 | 3 | 4 | 2 | 3 |
| ERX2465376 | 2 | 5 | 3 | 5 | 3 | 3 | 2 | 3 | 3 | 4 | 4 | 1 | 4 | 4 | 7 | 2 | 5 | 2 | 1 | 1 | 3 | 4 | 2 | 2 |
| ERX2465279 | 2 | 5 | 3 | 5 | 3 | 2 | 2 | 3 | 3 | 4 | 3 | 3 | 4 | 3 | 7 | 2 | 3 | 2 | 2 | 1 | 3 | 2 | 2 | 3 |
| ERX2465586 | 2 | 7 | 4 | 3 | 3 | 5 | 4 | 4 | 3 | 2 | 3 | 2 | 5 | 5 | 8 | 2 | 5 | 3 | 2 | 1 | 3 | 4 | 2 | 3 |
| ERX2465546 | 2 | 7 | 3 | 3 | 3 | 5 | 4 | 4 | 4 | 4 | 3 | 2 | 6 | 5 | 8 | 2 | 6 | 3 | 2 | 1 | 3 | 4 | 2 | 3 |
| ERX2465676 | 2 | 5 | 2 | 5 | 4 | 4 | 2 | 3 | 3 | 4 | 3 | 3 | 3 | 3 | 5 | 2 | 5 | 2 | 2 | 1 | 3 | 4 | 2 | 3 |
| ERX2465564 | 5 | 2 | 2 | 4 | 3 | 4 | 2 | 2 | 9 | 2 | 5 | 1 | 8 | 1 | 4 | 2 | 6 | 1 | 2 | 2 | 3 | 3 | 4 | 3 |
| ERX2465541 | 2 | 5 | 1 | 4 | 1 | 2 | 2 | 4 | 2 | 1 | 2 | 2 | 3 | 3 | 7 | 2 | 7 | 2 | 2 | 1 | 2 | 4 | 1 | 5 |
| ERX2465195 | 5 | 2 | 3 | 4 | 3 | 5 | 2 | 4 | 9 | 2 | 4 | 1 | 6 | 5 | 6 | 2 | 3 | 3 | 2 | 2 | 3 | 3 | 4 | 3 |
| ERX2465618 | 2 | 1 | 4 | 7 | 4 | 4 | 4 | 2 | 4 | 2 | 2 | 4 | 2 | 3 | 5 | 2 | 5 | 3 | 2 | 1 | 3 | 4 | 2 | 3 |
| ERX2465230 | 2 | 4 | 4 | 3 | 3 | 3 | 2 | 4 | 3 | 2 | 3 | 2 | 5 | 2 | 3 | 2 | 5 | 2 | 2 | 1 | 3 | 4 | 2 | 3 |
| ERX2465434 | 3 | 5 | 2 | 3 | 3 | 3 | 3 | 4 | 4 | 2 | 3 | 2 | 5 | 1 | 9 | 3 | 5 | 2 | 1 | 1 | 3 | 4 | 2 | 3 |
| ERX2465634 | 3 | 5 | 2 | 2 | 3 | 3 | 2 | 5 | 7 | 4 | 2 | 1 | 4 | 3 | 4 | 2 | 4 | 2 | 2 | 2 | 3 | 3 | 4 | 3 |
| ERX2465565 | 2 | 1 | 2 | 4 | 1 | 3 | 1 | 4 | 3 | 4 | 3 | 3 | 1 | 3 | 7 | 2 | 5 | 2 | 1 | 1 | 3 | 4 | 2 | 3 |
| ERX2465398 | 2 | 1 | 2 | 5 | 1 | 3 | 1 | 4 | 3 | 5 | 3 | 3 | 1 | 3 | 7 | 2 | 5 | 2 | 2 | 1 | 3 | 4 | 2 | 3 |
| ERX2465417 | 7 | 2 | 3 | 4 | 2 | 5 | 2 | 4 | 4 | 2 | 4 | 1 | 2 | 5 | 6 | 2 | 5 | 3 | 2 | 2 | 3 | 3 | 4 | 3 |
| ERX2465287 | 2 | 7 | 3 | 5 | 4 | 6 | 5 | 2 | 4 | 2 | 3 | 4 | 2 | 4 | 7 | 2 | 5 | 3 | 2 | 1 | 3 | 4 | 2 | 3 |
| ERX2465496 | 2 | 1 | 2 | 5 | 1 | 3 | 1 | 4 | 3 | 4 | 3 | 3 | 1 | 3 | 7 | 2 | 5 | 2 | 2 | 1 | 3 | 4 | 2 | 3 |
| ERX2465197 | 2 | 4 | 1 | 6 | 5 | 4 | 3 | 2 | 4 | 2 | 3 | 2 | 2 | 4 | 8 | 2 | 5 | 3 | 2 | 1 | 3 | 4 | 2 | 3 |
| ERX2465491 | 2 | 1 | 4 | 7 | 4 | 4 | 4 | 2 | 4 | 2 | 2 | 4 | 2 | 3 | 5 | 2 | 5 | 3 | 2 | 1 | 3 | 4 | 2 | 3 |
| ERX2465269 | 2 | 6 | 1 | 4 | 2 | 3 | 4 | 4 | 2 | 1 | 2 | 2 | 2 | 3 | 3 | 2 | 6 | 2 | 2 | 1 | 3 | 4 | 1 | 5 |
| ERX2465572 | 5 | 2 | 4 | 4 | 3 | 4 | 2 | 4 | 5 | 1 | 4 | 1 | 3 | 6 | 6 | 2 | 6 | 3 | 2 | 2 | 3 | 3 | 1 | 3 |
| ERX2465629 | 2 | 4 | 3 | 4 | 3 | 3 | 4 | 4 | 2 | 2 | 1 | 2 | 3 | 3 | 4 | 2 | 7 | 2 | 2 | 1 | 3 | 4 | 2 | 1 |
| ERX2465436 | 3 | 5 | 2 | 2 | 3 | 3 | 2 | 5 | 6 | 4 | 2 | 1 | 2 | 3 | 2 | 2 | 4 | 2 | 2 | 2 | 2 | 3 | 4 | 3 |
| ERX2465233 | 2 | 5 | 4 | 3 | 3 | 3 | 2 | 4 | 3 | 2 | 3 | 2 | 3 | 2 | 5 | 2 | 6 | 2 | 2 | 1 | 3 | 4 | 2 | 3 |
| ERX2465175 | 2 | 5 | 3 | 5 | 3 | 2 | 2 | 3 | 3 | 4 | 3 | 2 | 5 | 2 | 6 | 2 | 5 | 2 | 2 | 1 | 3 | 4 | 2 | 3 |
| ERX2465607 | 2 | 7 | 3 | 2 | 3 | 5 | 4 | 4 | 4 | 4 | 3 | 2 | 6 | 5 | 6 | 2 | 5 | 4 | 2 | 1 | 3 | 4 | 2 | 3 |
| ERX2465306 | 2 | 5 | 3 | 6 | 4 | 5 | 3 | 2 | 4 | 2 | 3 | 4 | 2 | 4 | 7 | 2 | 5 | 3 | 2 | 1 | 3 | 4 | 2 | 3 |
| ERX2465320 | 2 | 5 | 3 | 5 | 2 | 3 | 2 | 3 | 2 | 4 | 3 | 3 | 5 | 3 | 6 | 2 | 5 | 2 | 2 | 1 | 3 | 4 | 2 | 3 |
| ERX2465320 | 2 | 5 | 2 | 5 | 2 | 3 | 2 | 3 | 2 | 4 | 3 | 3 | 5 | 3 | 6 | 2 | 5 | 2 | 2 | 1 | 3 | 4 | 2 | 3 |
| ERX2465472 | 2 | 5 | 3 | 6 | 4 | 6 | 1 | 2 | 4 | 2 | 3 | 4 | 2 | 4 | 7 | 2 | 5 | 3 | 2 | 1 | 3 | 4 | 2 | 3 |
| ERX2465310 | 3 | 5 | 4 | 3 | 3 | 3 | 3 | 4 | 4 | 2 | 3 | 2 | 2 | 1 | 1 | 2 | 6 | 2 | 2 | 1 | 3 | 4 | 2 | 3 |
| ERX2465668 | 2 | 7 | 3 | 4 | 3 | 5 | 4 | 2 | 4 | 2 | 3 | 4 | 2 | 4 | 7 | 2 | 5 | 3 | 2 | 1 | 3 | 4 | 2 | 3 |
| ERX2465430 | 2 | 6 | 3 | 5 | 3 | 3 | 2 | 3 | 3 | 3 | 3 | 3 | 4 | 2 | 7 | 2 | 3 | 2 | 2 | 1 | 3 | 2 | 2 | 3 |
| ERX2465387 | 2 | 5 | 3 | 6 | 4 | 6 | 1 | 2 | 4 | 2 | 3 | 4 | 2 | 4 | 7 | 2 | 5 | 1 | 2 | 1 | 3 | 4 | 2 | 3 |
| ERX2465156 | 7 | 2 | 4 | 4 | 3 | 5 | 2 | 4 | 7 | 2 | 4 | 1 | 1 | 6 | 6 | 2 | 6 | 3 | 1 | 2 | 3 | 3 | 5 | 3 |
| ERX2465333 | 5 | 2 | 2 | 4 | 2 | 6 | 2 | 4 | 7 | 2 | 2 | 1 | 5 | 4 | 7 | 2 | 6 | 2 | 2 | 2 | 3 | 3 | 6 | 3 |
| ERX2465442 | 2 | 5 | 3 | 5 | 3 | 3 | 2 | 3 | 3 | 4 | 3 | 3 | 6 | 2 | 5 | 2 | 5 | 2 | 2 | 1 | 4 | 4 | 2 | 3 |
| ERX2465609 | 2 | 5 | 2 | 1 | 3 | 3 | 2 | 4 | 3 | 2 | 3 | 2 | 2 | 3 | 6 | 2 | 5 | 2 | 2 | 1 | 3 | 4 | 3 | 3 |
| ERX2465468 | 2 | 5 | 2 | 6 | 4 | 5 | 3 | 2 | 4 | 2 | 3 | 4 | 2 | 4 | 8 | 2 | 5 | 3 | 2 | 1 | 3 | 4 | 2 | 3 |
| ERX2465174 | 2 | 1 | 3 | 7 | 2 | 2 | 3 | 5 | 4 | 4 | 3 | 3 | 2 | 3 | 5 | 2 | 5 | 2 | 2 | 1 | 3 | 4 | 2 | 3 |

|            |   |   |   |   |   |   |   |   |   |   |   |   |    |   |   |   |   |   |   |   |   |   |   |   |   |
|------------|---|---|---|---|---|---|---|---|---|---|---|---|----|---|---|---|---|---|---|---|---|---|---|---|---|
| ERX2465326 | 2 | 5 | 3 | 6 | 3 | 3 | 2 | 3 | 3 | 4 | 3 | 1 | 4  | 3 | 6 | 1 | 5 | 2 | 2 | 1 | 3 | 4 | 2 | 3 |   |
| ERX2465544 | 2 | 7 | 3 | 2 | 3 | 5 | 4 | 4 | 4 | 4 | 3 | 2 | 5  | 5 | 6 | 2 | 5 | 4 | 2 | 1 | 3 | 4 | 2 | 3 |   |
| ERX2465368 | 2 | 5 | 3 | 5 | 2 | 3 | 2 | 3 | 3 | 4 | 3 | 3 | 6  | 3 | 6 | 2 | 5 | 2 | 2 | 1 | 3 | 4 | 2 | 3 |   |
| ERX2465347 | 2 | 5 | 2 | 4 | 3 | 3 | 1 | 4 | 4 | 2 | 4 | 2 | 2  | 3 | 3 | 2 | 3 | 2 | 2 | 1 | 3 | 4 | 2 | 2 |   |
| ERX2465220 | 2 | 7 | 3 | 5 | 4 | 6 | 5 | 2 | 4 | 2 | 3 | 4 | 2  | 3 | 8 | 2 | 5 | 3 | 2 | 1 | 3 | 4 | 2 | 3 |   |
| ERX2465181 | 2 | 1 | 2 | 5 | 1 | 3 | 1 | 4 | 3 | 4 | 3 | 3 | 2  | 3 | 9 | 2 | 5 | 2 | 1 | 1 | 3 | 4 | 2 | 3 |   |
| ERX2465158 | 2 | 3 | 3 | 2 | 4 | 3 | 2 | 4 | 3 | 2 | 4 | 2 | 2  | 3 | 2 | 2 | 5 | 2 | 2 | 1 | 3 | 4 | 1 | 3 |   |
| ERX2465207 | 2 | 5 | 3 | 5 | 3 | 3 | 2 | 3 | 3 | 4 | 1 | 3 | 6  | 3 | 6 | 2 | 5 | 2 | 2 | 1 | 3 | 4 | 2 | 3 |   |
| ERX2465379 | 2 | 5 | 3 | 3 | 3 | 5 | 4 | 4 | 4 | 4 | 3 | 2 | 6  | 5 | 8 | 2 | 5 | 3 | 2 | 1 | 3 | 4 | 2 | 3 |   |
| ERX2465358 | 2 | 5 | 4 | 3 | 2 | 3 | 2 | 3 | 3 | 2 | 2 | 2 | 2  | 2 | 4 | 2 | 5 | 2 | 2 | 1 | 3 | 4 | 2 | 3 |   |
| ERX2465530 | 2 | 5 | 2 | 5 | 3 | 3 | 2 | 3 | 3 | 4 | 3 | 2 | 4  | 2 | 5 | 2 | 3 | 2 | 1 | 1 | 3 | 2 | 2 | 3 |   |
| ERX2465366 | 2 | 6 | 2 | 7 | 3 | 4 | 2 | 3 | 3 | 4 | 7 | 3 | 2  | 6 | 7 | 2 | 5 | 2 | 2 | 1 | 3 | 4 | 2 | 2 |   |
| ERX2465497 | 2 | 5 | 4 | 4 | 3 | 3 | 4 | 3 | 3 | 2 | 3 | 3 | 3  | 3 | 1 | 0 | 2 | 5 | 1 | 2 | 1 | 3 | 4 | 1 | 3 |
| ERX2465429 | 6 | 2 | 3 | 4 | 2 | 5 | 2 | 4 | 9 | 2 | 2 | 1 | 1  | 9 | 5 | 2 | 6 | 1 | 2 | 2 | 3 | 3 | 2 | 3 |   |
| ERX2465305 | 2 | 7 | 3 | 3 | 3 | 4 | 4 | 4 | 4 | 4 | 3 | 2 | 5  | 5 | 8 | 2 | 5 | 3 | 2 | 1 | 3 | 4 | 2 | 3 |   |
| ERX2465341 | 3 | 5 | 2 | 2 | 3 | 3 | 2 | 5 | 3 | 4 | 2 | 1 | 4  | 3 | 4 | 2 | 4 | 2 | 2 | 2 | 3 | 3 | 6 | 3 |   |
| ERX2465163 | 2 | 4 | 3 | 4 | 2 | 3 | 2 | 4 | 2 | 2 | 1 | 2 | 4  | 3 | 4 | 2 | 6 | 2 | 1 | 1 | 3 | 4 | 2 | 1 |   |
| ERX2465538 | 2 | 1 | 4 | 8 | 3 | 4 | 4 | 2 | 4 | 2 | 2 | 4 | 2  | 3 | 5 | 2 | 5 | 3 | 2 | 1 | 3 | 4 | 2 | 3 |   |
| ERX2465649 | 6 | 2 | 4 | 4 | 2 | 5 | 2 | 4 | 7 | 2 | 3 | 1 | 2  | 5 | 6 | 2 | 5 | 3 | 2 | 2 | 3 | 3 | 5 | 3 |   |
| ERX2465383 | 2 | 5 | 3 | 5 | 3 | 3 | 2 | 3 | 3 | 4 | 1 | 3 | 6  | 3 | 6 | 2 | 5 | 2 | 2 | 1 | 3 | 4 | 2 | 3 |   |
| ERX2465482 | 2 | 1 | 2 | 5 | 1 | 3 | 1 | 4 | 3 | 4 | 3 | 2 | 1  | 3 | 1 | 0 | 2 | 5 | 2 | 2 | 1 | 3 | 4 | 2 | 3 |
| ERX2465393 | 2 | 5 | 4 | 3 | 1 | 3 | 2 | 4 | 3 | 2 | 4 | 2 | 3  | 2 | 3 | 2 | 5 | 2 | 2 | 1 | 3 | 3 | 2 | 3 |   |
| ERX2465165 | 2 | 4 | 4 | 4 | 3 | 3 | 4 | 4 | 2 | 2 | 3 | 2 | 3  | 2 | 5 | 2 | 4 | 2 | 2 | 1 | 3 | 4 | 2 | 3 |   |
| ERX2465637 | 2 | 5 | 5 | 3 | 4 | 3 | 2 | 4 | 2 | 2 | 4 | 2 | 5  | 2 | 5 | 2 | 5 | 2 | 2 | 1 | 3 | 4 | 2 | 3 |   |
| ERX2465261 | 2 | 4 | 1 | 4 | 2 | 3 | 2 | 4 | 2 | 1 | 2 | 2 | 3  | 3 | 3 | 2 | 6 | 2 | 2 | 1 | 3 | 4 | 1 | 5 |   |
| ERX2465489 | 2 | 8 | 4 | 3 | 4 | 5 | 4 | 2 | 4 | 2 | 3 | 4 | 2  | 4 | 7 | 2 | 5 | 3 | 2 | 1 | 3 | 4 | 2 | 3 |   |
| ERX2465456 | 2 | 7 | 3 | 2 | 4 | 5 | 4 | 2 | 4 | 2 | 2 | 5 | 2  | 4 | 8 | 2 | 5 | 3 | 2 | 1 | 3 | 4 | 2 | 3 |   |
| ERX2465410 | 2 | 6 | 4 | 4 | 3 | 2 | 3 | 2 | 2 | 1 | 2 | 2 | 2  | 3 | 6 | 1 | 6 | 2 | 2 | 1 | 3 | 4 | 2 | 3 |   |
| ERX2465407 | 2 | 7 | 3 | 6 | 4 | 5 | 4 | 2 | 2 | 2 | 3 | 3 | -2 | 4 | 8 | 2 | 5 | 3 | 2 | 1 | 3 | 4 | 2 | 3 |   |
| ERX2465636 | 2 | 6 | 2 | 7 | 3 | 4 | 2 | 3 | 3 | 4 | 7 | 3 | 2  | 6 | 7 | 2 | 5 | 2 | 2 | 1 | 3 | 4 | 2 | 2 |   |
| ERX2465595 | 2 | 5 | 3 | 4 | 3 | 2 | 4 | 4 | 1 | 2 | 6 | 2 | 3  | 3 | 6 | 2 | 6 | 2 | 2 | 1 | 3 | 3 | 2 | 3 |   |
| ERX2465550 | 2 | 7 | 3 | 3 | 3 | 5 | 4 | 4 | 2 | 2 | 3 | 2 | 5  | 5 | 8 | 2 | 5 | 3 | 2 | 1 | 3 | 4 | 2 | 3 |   |
| ERX2465638 | 2 | 4 | 2 | 3 | 1 | 3 | 2 | 4 | 2 | 2 | 4 | 2 | 4  | 2 | 5 | 2 | 5 | 2 | 2 | 1 | 3 | 4 | 2 | 3 |   |
| ERX2465445 | 2 | 5 | 3 | 4 | 3 | 2 | 2 | 3 | 3 | 4 | 3 | 3 | 3  | 4 | 7 | 2 | 3 | 2 | 2 | 1 | 3 | 2 | 2 | 3 |   |
| ERX2465665 | 2 | 7 | 3 | 3 | 3 | 5 | 4 | 4 | 4 | 4 | 3 | 2 | 6  | 5 | 8 | 2 | 5 | 3 | 2 | 1 | 3 | 4 | 2 | 3 |   |
| ERX2465294 | 5 | 2 | 3 | 4 | 3 | 5 | 2 | 2 | 8 | 2 | 5 | 1 | 6  | 1 | 0 | 4 | 2 | 6 | 1 | 2 | 2 | 3 | 3 | 4 | 3 |
| ERX2465677 | 2 | 4 | 3 | 6 | 4 | 5 | 3 | 2 | 4 | 2 | 3 | 2 | 2  | 4 | 7 | 2 | 3 | 3 | 2 | 1 | 2 | 4 | 2 | 3 |   |
| ERX2465369 | 2 | 5 | 3 | 3 | 3 | 3 | 2 | 4 | 2 | 2 | 3 | 2 | 2  | 2 | 6 | 2 | 5 | 2 | 2 | 1 | 3 | 4 | 2 | 3 |   |
| ERX2465490 | 2 | 5 | 4 | 2 | 1 | 3 | 2 | 4 | 2 | 2 | 4 | 2 | 3  | 2 | 5 | 2 | 5 | 2 | 2 | 1 | 3 | 4 | 2 | 3 |   |
| ERX2465173 | 2 | 8 | 2 | 4 | 3 | 4 | 4 | 4 | 2 | 2 | 7 | 2 | 3  | 2 | 5 | 2 | 4 | 2 | 2 | 1 | 3 | 4 | 2 | 3 |   |
| ERX2465318 | 2 | 3 | 3 | 6 | 4 | 5 | 3 | 2 | 4 | 2 | 3 | 4 | 2  | 4 | 8 | 2 | 5 | 3 | 2 | 1 | 3 | 4 | 2 | 3 |   |
| ERX2465359 | 2 | 1 | 2 | 5 | 1 | 2 | 4 | 4 | 2 | 4 | 3 | 1 | 1  | 3 | 7 | 2 | 5 | 2 | 2 | 1 | 2 | 4 | 2 | 3 |   |
| ERX2465246 | 2 | 5 | 2 | 3 | 4 | 3 | 2 | 4 | 2 | 2 | 3 | 2 | 3  | 2 | 5 | 2 | 5 | 2 | 2 | 1 | 3 | 4 | 2 | 3 |   |
| ERX2465355 | 2 | 4 | 2 | 3 | 3 | 3 | 2 | 2 | 2 | 1 | 2 | 2 | 2  | 3 | 6 | 1 | 6 | 2 | 2 | 1 | 3 | 4 | 2 | 3 |   |

|            |   |   |   |   |   |   |   |   |   |   |   |   |    |   |   |   |   |   |   |   |   |   |   |   |   |
|------------|---|---|---|---|---|---|---|---|---|---|---|---|----|---|---|---|---|---|---|---|---|---|---|---|---|
| ERX2465645 | 2 | 5 | 3 | 6 | 4 | 5 | 3 | 2 | 4 | 2 | 3 | 4 | 2  | 4 | 7 | 2 | 5 | 3 | 2 | 1 | 3 | 4 | 2 | 3 |   |
| ERX2465194 | 2 | 7 | 3 | 6 | 4 | 4 | 4 | 2 | 4 | 4 | 4 | 4 | 2  | 4 | 7 | 2 | 5 | 2 | 2 | 1 | 3 | 4 | 2 | 3 |   |
| ERX2465547 | 2 | 5 | 3 | 5 | 3 | 3 | 2 | 3 | 3 | 4 | 3 | 3 | 5  | 3 | 5 | 2 | 5 | 2 | 2 | 1 | 3 | 4 | 2 | 3 |   |
| ERX2465621 | 2 | 1 | 2 | 5 | 1 | 3 | 1 | 4 | 3 | 4 | 3 | 3 | 2  | 3 | 1 | 0 | 2 | 5 | 2 | 2 | 1 | 3 | 4 | 2 | 3 |
| ERX2465229 | 2 | 4 | 3 | 6 | 4 | 3 | 4 | 2 | 4 | 2 | 3 | 4 | 2  | 6 | 6 | 2 | 5 | 3 | 2 | 1 | 3 | 4 | 2 | 3 |   |
| ERX2465216 | 2 | 5 | 5 | 4 | 2 | 3 | 4 | 4 | 2 | 1 | 2 | 3 | 2  | 3 | 7 | 1 | 6 | 2 | 2 | 1 | 3 | 4 | 2 | 3 |   |
| ERX2465648 | 3 | 5 | 4 | 3 | 3 | 4 | 2 | 4 | 4 | 2 | 4 | 2 | 3  | 1 | 1 | 1 | 5 | 2 | 2 | 1 | 3 | 4 | 2 | 3 |   |
| ERX2465412 | 2 | 7 | 4 | 5 | 5 | 4 | 4 | 2 | 2 | 4 | 2 | 6 | -2 | 4 | 0 | 2 | 5 | 3 | 2 | 1 | 3 | 4 | 2 | 3 |   |
| ERX2465678 | 2 | 3 | 2 | 3 | 3 | 2 | 2 | 4 | 4 | 2 | 4 | 2 | 3  | 3 | 7 | 2 | 5 | 2 | 2 | 1 | 3 | 3 | 2 | 3 |   |
| ERX2465258 | 2 | 7 | 3 | 3 | 3 | 5 | 4 | 4 | 4 | 4 | 3 | 2 | 6  | 5 | 8 | 2 | 6 | 3 | 2 | 1 | 3 | 4 | 2 | 3 |   |
| ERX2465471 | 2 | 5 | 2 | 5 | 3 | 3 | 2 | 3 | 3 | 4 | 3 | 2 | 5  | 2 | 6 | 2 | 3 | 2 | 1 | 1 | 3 | 2 | 2 | 3 |   |
| ERX2465160 | 2 | 5 | 1 | 3 | 3 | 3 | 2 | 4 | 3 | 2 | 5 | 2 | 4  | 2 | 4 | 2 | 6 | 2 | 2 | 1 | 3 | 4 | 2 | 2 |   |
| ERX2465204 | 5 | 2 | 3 | 4 | 3 | 5 | 2 | 4 | 9 | 2 | 9 | 1 | 0  | 8 | 6 | 2 | 6 | 3 | 1 | 2 | 3 | 3 | 4 | 3 |   |
| ERX2465555 | 2 | 4 | 4 | 3 | 1 | 2 | 2 | 5 | 3 | 2 | 5 | 2 | 4  | 2 | 5 | 2 | 5 | 2 | 2 | 1 | 3 | 4 | 2 | 3 |   |
| ERX2465448 | 0 | 4 | 3 | 3 | 1 | 3 | 2 | 4 | 3 | 2 | 5 | 2 | 3  | 2 | 4 | 2 | 5 | 2 | 2 | 1 | 3 | 4 | 2 | 3 |   |
| ERX2465338 | 3 | 4 | 2 | 2 | 3 | 3 | 2 | 3 | 5 | 4 | 2 | 1 | 2  | 2 | 5 | 2 | 4 | 2 | 2 | 2 | 3 | 3 | 4 | 3 |   |
| ERX2465184 | 2 | 5 | 4 | 5 | 3 | 3 | 2 | 3 | 3 | 4 | 5 | 3 | 5  | 3 | 7 | 2 | 5 | 2 | 1 | 1 | 3 | 4 | 2 | 3 |   |
| ERX2465309 | 2 | 6 | 3 | 4 | 3 | 3 | 2 | 3 | 3 | 4 | 3 | 3 | 3  | 3 | 5 | 2 | 3 | 2 | 2 | 1 | 3 | 2 | 2 | 3 |   |
| ERX2465244 | 2 | 5 | 1 | 5 | 3 | 3 | 2 | 3 | 3 | 4 | 3 | 3 | 4  | 3 | 7 | 2 | 5 | 2 | 2 | 1 | 3 | 4 | 2 | 1 |   |
| ERX2465349 | 2 | 5 | 3 | 6 | 4 | 5 | 4 | 2 | 4 | 2 | 3 | 3 | 2  | 2 | 7 | 2 | 5 | 3 | 2 | 1 | 3 | 4 | 2 | 3 |   |
| ERX2465334 | 2 | 5 | 3 | 5 | 3 | 3 | 2 | 3 | 3 | 4 | 3 | 3 | 5  | 3 | 5 | 2 | 5 | 2 | 2 | 1 | 3 | 4 | 1 | 3 |   |
| ERX2465339 | 3 | 5 | 3 | 5 | 3 | 2 | 2 | 3 | 3 | 4 | 3 | 3 | 5  | 3 | 6 | 2 | 5 | 2 | 2 | 1 | 3 | 4 | 2 | 3 |   |
| ERX2465177 | 2 | 7 | 3 | 3 | 2 | 5 | 3 | 4 | 3 | 4 | 3 | 4 | 7  | 4 | 8 | 2 | 5 | 3 | 2 | 1 | 3 | 4 | 2 | 3 |   |
| ERX2465327 | 3 | 5 | 2 | 2 | 3 | 3 | 2 | 3 | 6 | 4 | 2 | 1 | 2  | 3 | 5 | 2 | 4 | 2 | 2 | 2 | 3 | 3 | 4 | 3 |   |
| ERX2465395 | 2 | 5 | 3 | 6 | 4 | 5 | 3 | 2 | 4 | 2 | 3 | 4 | 2  | 4 | 7 | 2 | 5 | 3 | 2 | 1 | 3 | 4 | 2 | 3 |   |
| ERX2465477 | 2 | 6 | 4 | 4 | 2 | 2 | 3 | 2 | 2 | 1 | 2 | 2 | 2  | 4 | 6 | 1 | 5 | 2 | 2 | 1 | 3 | 4 | 2 | 3 |   |
| ERX2465389 | 2 | 1 | 4 | 7 | 4 | 4 | 4 | 2 | 4 | 2 | 2 | 4 | 2  | 3 | 5 | 2 | 5 | 3 | 2 | 1 | 3 | 4 | 2 | 3 |   |
| ERX2465573 | 2 | 4 | 3 | 5 | 4 | 5 | 2 | 2 | 4 | 2 | 3 | 4 | 2  | 4 | 8 | 2 | 5 | 3 | 2 | 1 | 3 | 4 | 2 | 3 |   |
| ERX2465168 | 2 | 6 | 4 | 3 | 3 | 4 | 2 | 4 | 3 | 2 | 3 | 2 | 3  | 2 | 2 | 2 | 5 | 2 | 2 | 1 | 3 | 4 | 2 | 3 |   |
| ERX2465168 | 2 | 6 | 4 | 3 | 3 | 4 | 2 | 4 | 2 | 2 | 3 | 2 | 3  | 2 | 2 | 2 | 5 | 2 | 2 | 1 | 3 | 4 | 2 | 3 |   |
| ERX2465549 | 3 | 2 | 4 | 4 | 3 | 2 | 5 | 4 | 3 | 2 | 3 | 2 | 5  | 1 | 9 | 2 | 5 | 2 | 2 | 1 | 3 | 3 | 2 | 3 |   |
| ERX2465476 | 2 | 5 | 3 | 6 | 4 | 6 | 1 | 2 | 4 | 2 | 3 | 4 | 2  | 4 | 7 | 2 | 5 | 3 | 2 | 1 | 3 | 4 | 2 | 3 |   |
| ERX2465210 | 3 | 5 | 4 | 3 | 3 | 3 | 3 | 4 | 4 | 2 | 3 | 2 | 2  | 1 | 0 | 2 | 6 | 2 | 2 | 1 | 3 | 4 | 2 | 3 |   |
| ERX2465396 | 2 | 5 | 3 | 5 | 3 | 3 | 2 | 3 | 3 | 4 | 3 | 3 | 6  | 3 | 7 | 2 | 3 | 2 | 1 | 1 | 3 | 2 | 2 | 3 |   |
| ERX2465474 | 2 | 5 | 3 | 6 | 4 | 5 | 3 | 2 | 4 | 2 | 3 | 4 | 2  | 4 | 7 | 2 | 5 | 2 | 2 | 1 | 3 | 4 | 2 | 3 |   |
| ERX2465440 | 2 | 7 | 3 | 8 | 2 | 4 | 4 | 5 | 5 | 2 | 1 | 1 | 4  | 3 | 9 | 2 | 5 | 3 | 2 | 1 | 3 | 4 | 3 | 3 |   |
| ERX2465296 | 2 | 5 | 3 | 6 | 4 | 5 | 3 | 2 | 4 | 2 | 3 | 4 | 2  | 4 | 7 | 2 | 5 | 3 | 2 | 1 | 3 | 4 | 2 | 3 |   |
| ERX2465576 | 2 | 7 | 3 | 3 | 3 | 5 | 4 | 4 | 4 | 4 | 3 | 4 | 6  | 4 | 7 | 2 | 5 | 3 | 2 | 1 | 3 | 4 | 2 | 3 |   |
| ERX2465523 | 5 | 2 | 2 | 4 | 2 | 5 | 2 | 4 | 7 | 2 | 2 | 1 | 3  | 5 | 7 | 2 | 6 | 2 | 2 | 2 | 3 | 3 | 5 | 3 |   |
| ERX2465171 | 2 | 5 | 2 | 3 | 1 | 3 | 2 | 4 | 2 | 2 | 6 | 2 | 3  | 2 | 5 | 2 | 5 | 2 | 2 | 1 | 3 | 4 | 2 | 3 |   |
| ERX2465211 | 2 | 1 | 2 | 5 | 1 | 3 | 1 | 4 | 3 | 4 | 3 | 3 | 2  | 3 | 9 | 2 | 5 | 2 | 1 | 1 | 3 | 4 | 2 | 3 |   |
| ERX2465557 | 3 | 5 | 2 | 3 | 4 | 2 | 3 | 4 | 4 | 2 | 3 | 2 | 4  | 1 | 2 | 3 | 5 | 2 | 2 | 1 | 3 | 4 | 2 | 3 |   |
| ERX2465254 | 2 | 5 | 2 | 5 | 3 | 3 | 2 | 3 | 3 | 4 | 3 | 2 | 5  | 2 | 6 | 2 | 3 | 2 | 1 | 1 | 3 | 2 | 2 | 3 |   |
| ERX2465413 | 2 | 5 | 4 | 5 | 4 | 6 | 1 | 2 | 2 | 2 | 3 | 4 | -2 | 4 | 7 | 2 | 5 | 3 | 2 | 1 | 3 | 4 | 2 | 3 |   |

|            |   |   |   |   |   |   |   |   |   |   |   |   |   |    |   |   |   |   |   |   |   |   |   |   |   |
|------------|---|---|---|---|---|---|---|---|---|---|---|---|---|----|---|---|---|---|---|---|---|---|---|---|---|
| ERX2465594 | 2 | 4 | 6 | 3 | 3 | 2 | 2 | 3 | 4 | 2 | 3 | 2 | 3 | 2  | 5 | 2 | 5 | 2 | 1 | 1 | 3 | 4 | 2 | 3 |   |
| ERX2465362 | 2 | 1 | 3 | 7 | 1 | 2 | 3 | 5 | 3 | 4 | 3 | 3 | 2 | 2  | 6 | 3 | 5 | 2 | 2 | 1 | 3 | 4 | 2 | 3 |   |
| ERX2465289 | 2 | 7 | 3 | 3 | 3 | 5 | 2 | 4 | 4 | 4 | 3 | 2 | 6 | 5  | 8 | 2 | 5 | 4 | 2 | 1 | 4 | 4 | 2 | 3 |   |
| ERX2465282 | 2 | 3 | 1 | 3 | 3 | 3 | 2 | 4 | 3 | 2 | 4 | 2 | 2 | 2  | 5 | 2 | 6 | 2 | 2 | 1 | 3 | 4 | 2 | 2 |   |
| ERX2465176 | 2 | 7 | 3 | 6 | 4 | 4 | 4 | 2 | 4 | 4 | 4 | 4 | 2 | 4  | 7 | 2 | 5 | 2 | 2 | 1 | 3 | 4 | 2 | 3 |   |
| ERX2465288 | 2 | 5 | 1 | 3 | 1 | 3 | 4 | 4 | 2 | 1 | 2 | 2 | 2 | 3  | 7 | 2 | 8 | 2 | 2 | 1 | 2 | 4 | 1 | 5 |   |
| ERX2465400 | 2 | 7 | 3 | 6 | 4 | 5 | 5 | 2 | 4 | 2 | 3 | 4 | 2 | 4  | 8 | 2 | 5 | 3 | 2 | 1 | 3 | 4 | 2 | 3 |   |
| ERX2465498 | 2 | 5 | 4 | 4 | 3 | 2 | 3 | 3 | 2 | 1 | 2 | 2 | 2 | 3  | 7 | 1 | 7 | 2 | 2 | 1 | 3 | 4 | 2 | 3 |   |
| ERX2465372 | 2 | 5 | 2 | 2 | 3 | 3 | 1 | 5 | 4 | 2 | 2 | 1 | 2 | 2  | 5 | 2 | 4 | 2 | 2 | 2 | 3 | 3 | 3 | 3 |   |
| ERX2465319 | 2 | 5 | 3 | 6 | 4 | 5 | 3 | 2 | 4 | 2 | 2 | 4 | 2 | 4  | 7 | 2 | 5 | 3 | 2 | 1 | 3 | 4 | 2 | 3 |   |
| ERX2465203 | 2 | 5 | 1 | 4 | 1 | 2 | 2 | 4 | 2 | 1 | 2 | 2 | 3 | 3  | 7 | 2 | 7 | 2 | 2 | 1 | 2 | 4 | 1 | 5 |   |
| ERX2465559 | 2 | 7 | 3 | 2 | 3 | 5 | 2 | 4 | 5 | 4 | 3 | 2 | 6 | 3  | 8 | 2 | 5 | 2 | 2 | 1 | 3 | 4 | 2 | 3 |   |
| ERX2465601 | 2 | 5 | 3 | 3 | 3 | 4 | 4 | 4 | 4 | 4 | 3 | 2 | 6 | 5  | 8 | 2 | 5 | 3 | 2 | 1 | 3 | 4 | 2 | 3 |   |
| ERX2465408 | 3 | 6 | 3 | 6 | 2 | 5 | 0 | 3 | 6 | 4 | 1 | 2 | 4 | 3  | 2 | 2 | 4 | 2 | 2 | 2 | 3 | 2 | 3 | 2 |   |
| ERX2465380 | 3 | 4 | 3 | 7 | 4 | 3 | 2 | 5 | - | 2 | 4 | 5 | 3 | -2 | 3 | 2 | 2 | 4 | 2 | 2 | 1 | 3 | 3 | 2 | 3 |
| ERX2465418 | 2 | 5 | 2 | 6 | 4 | 5 | 3 | 2 | 4 | 2 | 3 | 4 | 2 | 4  | 8 | 2 | 5 | 3 | 2 | 1 | 3 | 4 | 2 | 3 |   |
| ERX2465628 | 2 | 7 | 3 | 3 | 2 | 6 | 4 | 4 | 4 | 2 | 3 | 4 | 6 | 6  | 1 | 2 | 5 | 3 | 2 | 1 | 3 | 4 | 2 | 3 |   |
| ERX2465392 | 2 | 1 | 2 | 5 | 1 | 3 | 1 | 4 | 3 | 4 | 3 | 3 | 1 | 3  | 7 | 2 | 5 | 2 | 2 | 1 | 3 | 4 | 2 | 3 |   |
| ERX2465548 | 1 | 1 | 1 | 5 | 1 | 3 | 4 | 4 | 3 | 4 | 2 | 3 | 2 | 3  | 7 | 2 | 5 | 2 | 2 | 1 | 3 | 4 | 2 | 3 |   |
| ERX2465640 | 2 | 5 | 3 | 3 | 3 | 5 | 4 | 4 | 4 | 4 | 3 | 2 | 6 | 5  | 8 | 2 | 5 | 3 | 2 | 1 | 3 | 4 | 2 | 3 |   |
| ERX2465653 | 2 | 6 | 1 | 4 | 2 | 4 | 2 | 4 | 2 | 1 | 2 | 2 | 3 | 3  | 2 | 2 | 6 | 2 | 1 | 1 | 3 | 4 | 2 | 3 |   |
| ERX2465465 | 2 | 1 | 4 | 7 | 4 | 4 | 4 | 2 | 4 | 2 | 2 | 4 | 2 | 3  | 5 | 2 | 5 | 3 | 2 | 1 | 3 | 4 | 2 | 3 |   |
| ERX2465255 | 3 | 5 | 3 | 4 | 3 | 3 | 3 | 2 | 4 | 2 | 3 | 2 | 2 | 1  | 6 | 2 | 5 | 2 | 2 | 1 | 3 | 4 | 2 | 3 |   |
| ERX2465335 | 2 | 1 | 4 | 7 | 4 | 4 | 4 | 2 | 4 | 2 | 2 | 4 | 2 | 3  | 5 | 2 | 5 | 3 | 2 | 1 | 3 | 4 | 2 | 3 |   |
| ERX2465209 | 5 | 2 | 3 | 4 | 3 | 6 | 2 | 4 | 6 | 1 | 9 | 1 | 3 | 6  | 6 | 2 | 6 | 3 | 2 | 2 | 3 | 3 | 1 | 3 |   |
| ERX2465461 | 2 | 6 | 3 | 3 | 3 | 5 | 4 | 4 | 4 | 4 | 3 | 2 | 5 | 4  | 7 | 2 | 5 | 3 | 2 | 1 | 3 | 4 | 2 | 3 |   |
| ERX2465553 | 5 | 2 | 2 | 4 | 3 | 4 | 1 | 4 | 4 | 2 | 2 | 1 | 8 | 0  | 7 | 2 | 6 | 2 | 2 | 2 | 1 | 3 | 6 | 3 |   |
| ERX2465688 | 3 | 5 | 3 | 4 | 3 | 3 | 3 | 2 | 4 | 2 | 3 | 2 | 2 | 1  | 6 | 2 | 5 | 2 | 2 | 1 | 3 | 4 | 2 | 3 |   |
| ERX2465540 | 2 | 5 | 3 | 5 | 3 | 4 | 2 | 3 | 3 | 4 | 3 | 3 | 5 | 3  | 5 | 2 | 5 | 2 | 2 | 1 | 3 | 4 | 2 | 3 |   |
| ERX2465672 | 2 | 6 | 3 | 3 | 3 | 5 | 4 | 4 | 2 | 4 | 3 | 2 | 3 | 4  | 7 | 2 | 5 | 3 | 2 | 1 | 3 | 4 | 2 | 3 |   |
| ERX2465324 | 4 | 2 | 3 | 4 | 3 | 5 | 2 | 4 | 1 | 0 | 2 | 6 | 1 | 6  | 6 | 4 | 2 | 6 | 3 | 1 | 2 | 1 | 3 | 4 | 3 |
| ERX2465508 | 2 | 5 | 3 | 6 | 3 | 3 | 2 | 3 | 3 | 4 | 3 | 2 | 6 | 2  | 7 | 2 | 3 | 2 | 1 | 1 | 3 | 2 | 2 | 3 |   |
| ERX2465420 | 0 | 5 | 3 | 3 | 3 | 3 | 2 | 4 | 3 | 2 | 3 | 2 | 3 | 2  | 5 | 2 | 6 | 2 | 2 | 1 | 3 | 4 | 2 | 3 |   |
| ERX2465533 | 5 | 2 | 2 | 4 | 3 | 4 | 1 | 4 | 4 | 2 | 2 | 1 | 1 | 0  | 8 | 2 | 6 | 3 | 2 | 2 | 3 | 3 | 6 | 3 |   |
| ERX2465660 | 2 | 5 | 3 | 6 | 4 | 5 | 3 | 2 | 4 | 2 | 3 | 4 | 2 | 4  | 7 | 2 | 5 | 3 | 2 | 1 | 3 | 4 | 2 | 3 |   |
| ERX2465198 | 2 | 5 | 3 | 6 | 4 | 5 | 3 | 2 | 4 | 2 | 3 | 4 | 2 | 4  | 7 | 2 | 5 | 3 | 2 | 1 | 3 | 4 | 2 | 3 |   |
| ERX2465603 | 3 | 5 | 2 | 2 | 3 | 3 | 0 | 5 | 4 | 4 | 2 | 1 | 2 | 1  | 5 | 2 | 4 | 2 | 2 | 2 | 2 | 3 | 5 | 3 |   |
| ERX2465361 | 2 | 1 | 4 | 7 | 4 | 4 | 3 | 2 | 2 | 2 | 2 | 4 | 2 | 4  | 5 | 2 | 5 | 3 | 2 | 1 | 3 | 4 | 2 | 3 |   |
| ERX2465526 | 2 | 3 | 4 | 3 | 2 | 3 | 2 | 4 | 2 | 2 | 3 | 2 | 5 | 2  | 7 | 2 | 5 | 2 | 2 | 1 | 3 | 4 | 2 | 3 |   |
| ERX2465346 | 2 | 6 | 4 | 4 | 3 | 4 | 4 | 4 | 2 | 2 | 6 | 2 | 3 | 2  | 5 | 2 | 5 | 2 | 2 | 1 | 2 | 4 | 2 | 3 |   |
| ERX2465262 | 2 | 5 | 6 | 4 | 3 | 2 | 3 | 4 | 2 | 1 | 2 | 2 | 2 | 3  | 7 | 1 | 6 | 2 | 2 | 1 | 3 | 4 | 2 | 3 |   |
| ERX2465330 | 2 | 4 | 3 | 5 | 4 | 5 | 2 | 2 | 4 | 2 | 3 | 4 | 2 | 4  | 8 | 2 | 5 | 3 | 2 | 1 | 3 | 4 | 2 | 3 |   |
| ERX2465192 | 5 | 2 | 3 | 4 | 3 | 5 | 2 | 3 | 6 | 1 | 4 | 1 | 2 | 1  | 5 | 5 | 2 | 0 | 2 | 2 | 2 | 3 | 3 | 4 | 3 |
| ERX2465427 | 5 | 2 | 2 | 4 | 3 | 4 | 1 | 4 | 4 | 2 | 2 | 1 | 1 | 0  | 8 | 2 | 6 | 3 | 2 | 2 | 3 | 3 | 6 | 3 |   |

|            |   |   |   |   |   |   |   |   |   |   |   |   |    |   |   |   |   |   |   |   |   |   |   |   |
|------------|---|---|---|---|---|---|---|---|---|---|---|---|----|---|---|---|---|---|---|---|---|---|---|---|
| ERX2465222 | 2 | 5 | 4 | 3 | 3 | 3 | 2 | 3 | 3 | 2 | 1 | 1 | 5  | 3 | 7 | 2 | 5 | 2 | 2 | 1 | 2 | 4 | 2 | 3 |
| ERX2465302 | 2 | 5 | 1 | 4 | 1 | 2 | 4 | 4 | 2 | 1 | 2 | 2 | 3  | 3 | 8 | 2 | 6 | 2 | 2 | 1 | 2 | 4 | 1 | 5 |
| ERX2465236 | 2 | 7 | 3 | 3 | 3 | 5 | 2 | 4 | 4 | 4 | 3 | 2 | 4  | 5 | 4 | 2 | 5 | 3 | 2 | 1 | 3 | 4 | 2 | 3 |
| ERX2465684 | 2 | 7 | 3 | 2 | 3 | 4 | 4 | 4 | 4 | 4 | 3 | 2 | 6  | 5 | 8 | 2 | 5 | 4 | 2 | 1 | 3 | 4 | 2 | 3 |
| ERX2465253 | 2 | 1 | 2 | 5 | 1 | 3 | 3 | 4 | 2 | 4 | 5 | 5 | 1  | 3 | 8 | 2 | 4 | 2 | 2 | 1 | 3 | 4 | 3 | 1 |
| ERX2465633 | 2 | 5 | 3 | 6 | 4 | 5 | 3 | 2 | 4 | 2 | 3 | 4 | 2  | 4 | 7 | 2 | 5 | 3 | 2 | 1 | 3 | 4 | 2 | 3 |
| ERX2465206 | 2 | 1 | 4 | 7 | 4 | 4 | 4 | 2 | 4 | 2 | 2 | 4 | 2  | 3 | 5 | 2 | 5 | 3 | 2 | 1 | 3 | 4 | 2 | 3 |
| ERX2465227 | 2 | 7 | 2 | 4 | 3 | 4 | 1 | 4 | 2 | 2 | 5 | 2 | 3  | 2 | 5 | 2 | 4 | 2 | 2 | 1 | 3 | 4 | 2 | 3 |
| ERX2465454 | 3 | 2 | 2 | 4 | 3 | 4 | 1 | 4 | 4 | 2 | 2 | 1 | 8  | 6 | 7 | 2 | 6 | 3 | 2 | 2 | 3 | 3 | 6 | 3 |
| ERX2465223 | 2 | 5 | 4 | 3 | 1 | 4 | 2 | 4 | 3 | 2 | 3 | 2 | 3  | 2 | 2 | 2 | 5 | 2 | 2 | 1 | 3 | 4 | 2 | 3 |
| ERX2465486 | 2 | 4 | 1 | 3 | 1 | 3 | 4 | 4 | 2 | 1 | 2 | 2 | 4  | 3 | 7 | 2 | 6 | 2 | 2 | 1 | 2 | 4 | 1 | 5 |
| ERX2465270 | 2 | 5 | 3 | 6 | 4 | 5 | 3 | 2 | 4 | 2 | 3 | 4 | 2  | 4 | 7 | 2 | 5 | 3 | 2 | 1 | 3 | 4 | 2 | 3 |
| ERX2465185 | 2 | 5 | 4 | 3 | 1 | 3 | 2 | 4 | 2 | 2 | 5 | 0 | 3  | 2 | 4 | 2 | 5 | 2 | 2 | 1 | 3 | 4 | 2 | 3 |
| ERX2465422 | 2 | 5 | 3 | 5 | 3 | 3 | 2 | 3 | 3 | 4 | 3 | 3 | 5  | 3 | 5 | 2 | 5 | 2 | 2 | 1 | 3 | 4 | 2 | 3 |
| ERX2465495 | 3 | 5 | 2 | 2 | 3 | 3 | 2 | 5 | 6 | 4 | 2 | 1 | 2  | 3 | 5 | 2 | 4 | 2 | 2 | 2 | 4 | 3 | 5 | 3 |
| ERX2465188 | 2 | 5 | 3 | 5 | 3 | 2 | 2 | 3 | 3 | 4 | 3 | 2 | 6  | 2 | 7 | 2 | 3 | 2 | 1 | 1 | 3 | 2 | 1 | 3 |
| ERX2465278 | 2 | 5 | 2 | 6 | 4 | 5 | 3 | 2 | 4 | 2 | 3 | 4 | 2  | 4 | 7 | 2 | 5 | 3 | 2 | 1 | 3 | 4 | 2 | 3 |
| ERX2465662 | 2 | 4 | 3 | 5 | 3 | 3 | 2 | 3 | 3 | 4 | 3 | 3 | 4  | 3 | 4 | 2 | 5 | 2 | 2 | 1 | 3 | 4 | 2 | 3 |
| ERX2465337 | 2 | 4 | 1 | 4 | 2 | 3 | 4 | 4 | 2 | 1 | 2 | 2 | 4  | 3 | 8 | 2 | 6 | 2 | 2 | 1 | 3 | 4 | 1 | 5 |
| ERX2465453 | 2 | 5 | 3 | 4 | 3 | 3 | 4 | 4 | 2 | 2 | 1 | 2 | 4  | 4 | 7 | 2 | 6 | 2 | 2 | 1 | 3 | 4 | 2 | 1 |
| ERX2465647 | 5 | 2 | 2 | 4 | 3 | 4 | 1 | 4 | 4 | 2 | 2 | 1 | 8  | 1 | 4 | 2 | 6 | 3 | 2 | 2 | 3 | 3 | 6 | 3 |
| ERX2465186 | 2 | 5 | 3 | 5 | 3 | 3 | 2 | 3 | 3 | 4 | 3 | 3 | 6  | 3 | 7 | 2 | 3 | 2 | 2 | 1 | 3 | 2 | 2 | 3 |
| ERX2465307 | 2 | 5 | 3 | 2 | 3 | 3 | 2 | 4 | 3 | 2 | 3 | 2 | 2  | 3 | 7 | 2 | 5 | 2 | 2 | 1 | 3 | 4 | 1 | 2 |
| ERX2465162 | 2 | 5 | 4 | 4 | 3 | 2 | 3 | 3 | 2 | 1 | 2 | 2 | 2  | 3 | 7 | 1 | 7 | 2 | 2 | 1 | 3 | 4 | 2 | 3 |
| ERX2465577 | 2 | 7 | 3 | 3 | 3 | 5 | 4 | 4 | 4 | 4 | 3 | 2 | 6  | 7 | 6 | 2 | 5 | 3 | 2 | 1 | 3 | 4 | 2 | 3 |
| ERX2465504 | 2 | 5 | 5 | 3 | 1 | 3 | 2 | 4 | 3 | 2 | 5 | 2 | 3  | 2 | 5 | 2 | 5 | 2 | 2 | 1 | 3 | 4 | 2 | 3 |
| ERX2465623 | 2 | 4 | 4 | 2 | 1 | 3 | 2 | 2 | 3 | 2 | 5 | 2 | 4  | 2 | 5 | 2 | 5 | 2 | 2 | 1 | 3 | 4 | 2 | 3 |
| ERX2465394 | 2 | 4 | 2 | 3 | 4 | 3 | 2 | 4 | 2 | 2 | 3 | 2 | 4  | 2 | 5 | 2 | 5 | 2 | 2 | 1 | 3 | 4 | 2 | 2 |
| ERX2465360 | 2 | 5 | 2 | 4 | 3 | 3 | 1 | 4 | 4 | 2 | 4 | 2 | 3  | 3 | 3 | 2 | 3 | 2 | 2 | 1 | 3 | 4 | 2 | 2 |
| ERX2465641 | 2 | 5 | 5 | 4 | 3 | 2 | 3 | 2 | 2 | 1 | 2 | 2 | 2  | 3 | 6 | 1 | 5 | 2 | 2 | 1 | 3 | 4 | 2 | 2 |
| ERX2465597 | 2 | 4 | 1 | 4 | 1 | 3 | 4 | 4 | 2 | 1 | 2 | 2 | 5  | 3 | 6 | 2 | 6 | 2 | 2 | 1 | 2 | 2 | 1 | 5 |
| ERX2465516 | 5 | 1 | 2 | 4 | 2 | 5 | 2 | 4 | 7 | 2 | 2 | 1 | 7  | 8 | 7 | 2 | 6 | 2 | 2 | 2 | 3 | 3 | 5 | 3 |
| ERX2465438 | 2 | 3 | 2 | 3 | 4 | 3 | 2 | 4 | 1 | 2 | 3 | 2 | 3  | 2 | 5 | 2 | 5 | 2 | 2 | 1 | 3 | 4 | 2 | 3 |
| ERX2465689 | 2 | 7 | 3 | 6 | 3 | 4 | 4 | 2 | 4 | 4 | 4 | 4 | 2  | 4 | 7 | 2 | 5 | 2 | 2 | 1 | 3 | 4 | 2 | 3 |
| ERX2465652 | 2 | 7 | 3 | 6 | 4 | 5 | 4 | 2 | 2 | 2 | 3 | 3 | -2 | 4 | 8 | 2 | 5 | 3 | 2 | 1 | 3 | 4 | 2 | 3 |
| ERX2465466 | 5 | 2 | 3 | 4 | 3 | 6 | 2 | 4 | 6 | 1 | 4 | 1 | 3  | 6 | 6 | 2 | 6 | 2 | 2 | 2 | 3 | 3 | 4 | 3 |
| ERX2465646 | 2 | 5 | 3 | 6 | 4 | 5 | 3 | 2 | 4 | 2 | 3 | 4 | 2  | 4 | 7 | 2 | 5 | 3 | 2 | 1 | 2 | 4 | 2 | 3 |
| ERX2465215 | 2 | 8 | 4 | 4 | 3 | 4 | 5 | 4 | 2 | 2 | 4 | 2 | 3  | 2 | 5 | 2 | 5 | 2 | 2 | 1 | 2 | 4 | 2 | 3 |
| ERX2465215 | 2 | 8 | 5 | 4 | 3 | 4 | 5 | 4 | 2 | 2 | 4 | 2 | 3  | 2 | 5 | 2 | 5 | 2 | 2 | 1 | 2 | 4 | 2 | 3 |
| ERX2465234 | 2 | 5 | 3 | 5 | 3 | 3 | 2 | 3 | 3 | 4 | 2 | 3 | 2  | 3 | 7 | 2 | 5 | 2 | 2 | 1 | 3 | 4 | 2 | 3 |
| ERX2465534 | 2 | 5 | 3 | 5 | 3 | 3 | 2 | 3 | 3 | 4 | 3 | 3 | 3  | 2 | 7 | 2 | 5 | 2 | 2 | 1 | 4 | 4 | 2 | 3 |
| ERX2465614 | 2 | 1 | 2 | 5 | 1 | 3 | 1 | 4 | 3 | 4 | 3 | 3 | 1  | 3 | 7 | 2 | 5 | 2 | 1 | 1 | 3 | 4 | 2 | 3 |
| ERX2465583 | 2 | 6 | 3 | 2 | 3 | 3 | 2 | 4 | 3 | 2 | 3 | 2 | 2  | 5 | 7 | 2 | 5 | 2 | 2 | 1 | 3 | 2 | 1 | 2 |
| ERX2465200 | 2 | 7 | 2 | 6 | 4 | 4 | 4 | 2 | 3 | 2 | 3 | 2 | 2  | 4 | 8 | 2 | 5 | 3 | 2 | 1 | 3 | 4 | 2 | 3 |
| ERX2465391 | 2 | 5 | 3 | 5 | 4 | 5 | 3 | 2 | 2 | 2 | 3 | 4 | 2  | 3 | 8 | 2 | 5 | 3 | 2 | 1 | 3 | 4 | 2 | 3 |

|            |   |   |   |   |   |   |   |   |   |   |   |   |   |   |   |   |   |   |   |   |   |   |   |   |
|------------|---|---|---|---|---|---|---|---|---|---|---|---|---|---|---|---|---|---|---|---|---|---|---|---|
| ERX2465449 | 2 | 5 | 2 | 6 | 3 | 5 | 3 | 2 | 2 | 2 | 3 | 4 | 5 | 6 | 6 | 2 | 7 | 3 | 2 | 1 | 3 | 4 | 2 | 3 |
| ERX2465588 | 2 | 5 | 2 | 3 | 3 | 3 | 1 | 4 | 3 | 2 | 4 | 2 | 3 | 3 | 4 | 2 | 3 | 2 | 2 | 1 | 3 | 4 | 2 | 2 |
| ERX2465242 | 2 | 5 | 2 | 2 | 3 | 3 | 2 | 4 | 3 | 2 | 3 | 2 | 3 | 3 | 7 | 2 | 5 | 2 | 2 | 1 | 3 | 4 | 1 | 3 |
| ERX2465231 | 5 | 2 | 2 | 1 | 3 | 4 | 1 | 4 | 4 | 2 | 2 | 1 | 9 | 9 | 7 | 2 | 6 | 3 | 2 | 2 | 3 | 3 | 6 | 3 |
| ERX2465568 | 2 | 1 | 4 | 7 | 4 | 4 | 4 | 2 | 4 | 2 | 2 | 4 | 2 | 3 | 5 | 2 | 5 | 3 | 2 | 1 | 3 | 4 | 2 | 3 |
| ERX2465625 | 2 | 1 | 4 | 7 | 4 | 4 | 4 | 2 | 4 | 2 | 2 | 4 | 2 | 3 | 5 | 2 | 5 | 3 | 2 | 1 | 3 | 4 | 2 | 3 |
| ERX2465315 | 2 | 7 | 3 | 4 | 3 | 4 | 4 | 2 | 3 | 2 | 3 | 2 | 2 | 4 | 7 | 2 | 5 | 3 | 2 | 1 | 3 | 4 | 2 | 2 |
| ERX2465543 | 2 | 5 | 3 | 3 | 3 | 3 | 2 | 4 | 3 | 2 | 5 | 2 | 3 | 2 | 5 | 2 | 6 | 2 | 2 | 1 | 3 | 4 | 2 | 3 |
| ERX2465615 | 2 | 6 | 3 | 6 | 3 | 3 | 2 | 3 | 3 | 4 | 3 | 3 | 4 | 2 | 7 | 2 | 5 | 2 | 2 | 1 | 3 | 4 | 2 | 3 |
| ERX2465286 | 2 | 8 | 3 | 3 | 3 | 5 | 4 | 4 | 3 | 4 | 4 | 2 | 5 | 3 | 8 | 2 | 5 | 3 | 2 | 1 | 3 | 4 | 2 | 3 |
| ERX2465485 | 2 | 5 | 1 | 2 | 3 | 2 | 4 | 4 | 3 | 2 | 3 | 2 | 4 | 2 | 7 | 2 | 5 | 2 | 2 | 1 | 3 | 4 | 2 | 3 |
| ERX2465492 | 2 | 3 | 4 | 4 | 4 | 2 | 3 | 6 | 2 | 1 | 2 | 2 | 2 | 3 | 5 | 1 | 6 | 2 | 2 | 1 | 3 | 4 | 2 | 3 |
| ERX2465221 | 2 | 5 | 3 | 3 | 3 | 5 | 4 | 4 | 4 | 4 | 3 | 2 | 6 | 5 | 8 | 2 | 5 | 2 | 2 | 1 | 3 | 4 | 2 | 3 |
| ERX2465624 | 4 | 2 | 1 | 4 | 3 | 5 | 2 | 4 | 7 | 2 | 4 | 1 | 8 | 6 | 6 | 2 | 6 | 3 | 2 | 3 | 4 | 3 | 4 | 3 |
| ERX2465343 | 2 | 5 | 4 | 5 | 3 | 3 | 2 | 3 | 3 | 4 | 4 | 3 | 6 | 5 | 7 | 2 | 5 | 2 | 2 | 1 | 3 | 4 | 2 | 3 |
| ERX2465190 | 2 | 2 | 3 | 3 | 4 | 3 | 2 | 4 | 2 | 2 | 3 | 2 | 3 | 2 | 3 | 2 | 5 | 2 | 2 | 1 | 3 | 4 | 2 | 2 |
| ERX2465169 | 2 | 6 | 3 | 7 | 3 | 4 | 2 | 3 | 3 | 4 | 5 | 3 | 2 | 6 | 7 | 2 | 5 | 2 | 2 | 1 | 3 | 4 | 2 | 2 |
| ERX2465331 | 2 | 5 | 4 | 4 | 2 | 3 | 4 | 2 | 2 | 2 | 1 | 2 | 3 | 2 | 6 | 2 | 6 | 1 | 2 | 1 | 3 | 4 | 2 | 1 |
| ERX2465268 | 2 | 7 | 3 | 2 | 3 | 5 | 4 | 4 | 4 | 4 | 4 | 2 | 6 | 5 | 6 | 2 | 5 | 4 | 2 | 1 | 3 | 4 | 2 | 3 |
| ERX2465631 | 2 | 6 | 2 | 7 | 3 | 4 | 2 | 3 | 3 | 4 | 7 | 3 | 2 | 6 | 7 | 2 | 5 | 2 | 2 | 1 | 3 | 4 | 2 | 2 |
| ERX2465522 | 2 | 5 | 2 | 2 | 3 | 3 | 1 | 4 | 2 | 2 | 3 | 2 | 3 | 2 | 5 | 2 | 6 | 2 | 2 | 1 | 3 | 4 | 2 | 3 |
| ERX2465357 | 2 | 5 | 2 | 3 | 3 | 4 | 1 | 3 | 3 | 2 | 5 | 2 | 3 | 3 | 4 | 2 | 5 | 2 | 2 | 1 | 3 | 4 | 2 | 2 |
| ERX2465567 | 2 | 4 | 5 | 3 | 3 | 5 | 2 | 4 | 4 | 4 | 3 | 4 | 4 | 3 | 8 | 2 | 5 | 3 | 2 | 1 | 4 | 4 | 2 | 3 |
| ERX2465276 | 2 | 7 | 3 | 3 | 3 | 5 | 4 | 4 | 3 | 4 | 3 | 2 | 5 | 5 | 8 | 2 | 5 | 3 | 2 | 1 | 3 | 4 | 2 | 3 |
| ERX2465473 | 2 | 1 | 4 | 7 | 4 | 4 | 2 | 2 | 4 | 2 | 2 | 4 | 2 | 3 | 5 | 2 | 5 | 3 | 2 | 1 | 3 | 4 | 2 | 3 |
| ERX2465539 | 2 | 1 | 3 | 5 | 1 | 3 | 3 | 4 | 3 | 4 | 3 | 3 | 2 | 4 | 8 | 2 | 5 | 2 | 2 | 0 | 3 | 4 | 2 | 3 |

**Supplementary Table S2. Sequence quality of the 535 sequences according to Breseq software. This supplementary material is hosted by *Eurosurveillance* as supporting information alongside the article [Towards standardisation: comparison of five whole genome sequencing (WGS) analysis pipelines for detection of epidemiologically linked tuberculosis cases], on behalf of the authors, who remain responsible for the accuracy and appropriateness of the content. The same standards for ethics, copyright, attributions and permissions as for the article apply. Supplements are not edited by *Eurosurveillance* and the journal is not responsible for the maintenance of any links or email addresses provided therein.**

| strain     | reads   | bases     | passed filters | average | longest | mapped | cov   | var  | %mapped reads |
|------------|---------|-----------|----------------|---------|---------|--------|-------|------|---------------|
| ERX2465512 | 1484112 | 180711073 | 100.0%         | 121,8   | 126     | 0,968  | 80,9  | 4,4  | 98.8%         |
| ERX2465208 | 1713998 | 213178275 | 100.0%         | 124,4   | 126     | 0,973  | 95,9  | 5,8  | 98.8%         |
| ERX2465608 | 1669847 | 204288928 | 100.0%         | 122,3   | 126     | 0,954  | 100,6 | 34,1 | 98.0%         |
| ERX2465437 | 2607223 | 303628567 | 100.0%         | 116,5   | 126     | 0,975  | 136,1 | 8,9  | 98.6%         |
| ERX2465317 | 2696550 | 319408541 | 100.0%         | 118,5   | 126     | 0,944  | 139,7 | 8,1  | 98.5%         |
| ERX2465584 | 2928791 | 342924858 | 100.0%         | 117,1   | 126     | 0,976  | 155,2 | 7,8  | 98.9%         |
| ERX2465264 | 1499296 | 187132061 | 100.0%         | 124,8   | 126     | 0,97   | 83,9  | 5    | 98.7%         |
| ERX2465292 | 1427504 | 172675841 | 100.0%         | 121     | 126     | 0,971  | 76,8  | 4,8  | 98.6%         |
| ERX2465384 | 2937000 | 350313164 | 100.0%         | 119,3   | 126     | 0,97   | 157,2 | 6,4  | 98.7%         |
| ERX2465263 | 3912809 | 474043691 | 100.0%         | 121,2   | 126     | 0,973  | 216,1 | 10,5 | 98.8%         |
| ERX2465424 | 4071543 | 467586791 | 100.0%         | 114,8   | 126     | 0,967  | 210,4 | 10,8 | 98.6%         |

|             |         |           |        |       |     |       |       |      |       |
|-------------|---------|-----------|--------|-------|-----|-------|-------|------|-------|
| ERX2465507  | 3386647 | 384504872 | 100.0% | 113,5 | 126 | 0,959 | 168,4 | 11,2 | 98.5% |
| ERX2465312  | 6056757 | 699201206 | 100.0% | 115,4 | 126 | 0,971 | 319,4 | 12,4 | 99.0% |
| ERX2465675  | 2213733 | 267642795 | 100.0% | 120,9 | 126 | 0,976 | 119,9 | 7,6  | 98.5% |
| ERX2465673  | 2905485 | 355748172 | 100.0% | 122,4 | 126 | 0,977 | 158,8 | 8,5  | 98.6% |
| ERX2465314  | 5021362 | 590596786 | 100.0% | 117,6 | 126 | 0,977 | 267,8 | 10   | 98.5% |
| ERX2465525  | 2070869 | 246689990 | 100.0% | 119,1 | 126 | 0,967 | 110,8 | 6,2  | 98.9% |
| ERX2465411  | 1848078 | 229948669 | 100.0% | 124,4 | 126 | 0,968 | 102,6 | 6,2  | 98.3% |
| ERX2465180  | 4618207 | 531607592 | 100.0% | 115,1 | 126 | 0,954 | 238,4 | 8,1  | 98.6% |
| ERX2465481  | 2000000 | 235432087 | 100.0% | 117,7 | 126 | 0,98  | 102,7 | 6,9  | 98.9% |
| ERX2465591  | 1595548 | 196556391 | 100.0% | 123,2 | 126 | 0,96  | 96,7  | 22,4 | 98.5% |
| ERX2465293  | 1999989 | 248342101 | 100.0% | 124,2 | 126 | 0,967 | 111   | 6,1  | 98.3% |
| ERX2465635  | 1588769 | 190712284 | 100.0% | 120   | 126 | 0,97  | 85    | 5,4  | 98.5% |
| ERX2465441  | 2000000 | 248760439 | 100.0% | 124,4 | 126 | 0,976 | 107,9 | 7,6  | 98.8% |
| ERX2465587  | 3550402 | 412216489 | 100.0% | 116,1 | 126 | 0,957 | 186,3 | 10,2 | 98.6% |
| ERX2465503  | 3498359 | 410185605 | 100.0% | 117,3 | 126 | 0,974 | 186,7 | 8    | 98.8% |
| ERX2465399  | 2780848 | 320711084 | 100.0% | 115,3 | 126 | 0,967 | 143,4 | 9,4  | 98.9% |
| ERX2465593  | 1815678 | 221473765 | 100.0% | 122   | 126 | 0,98  | 97,6  | 6,6  | 98.6% |
| ERX2465373  | 2373399 | 282326095 | 100.0% | 119   | 126 | 0,947 | 125,9 | 5,3  | 98.7% |
| ERX2465323  | 3588955 | 417791547 | 100.0% | 116,4 | 126 | 0,964 | 186,7 | 11,7 | 98.9% |
| ERX2465571  | 3528006 | 404421922 | 100.0% | 114,6 | 126 | 0,969 | 180   | 11   | 98.5% |
| ERX2465239  | 3142894 | 359627154 | 100.0% | 114,4 | 126 | 0,977 | 159,6 | 10,2 | 98.6% |
| ERX2465304  | 2129153 | 256734935 | 100.0% | 120,6 | 126 | 0,979 | 110,5 | 6,5  | 98.1% |
| ERX2465610* | 2000000 | 232922216 | 100.0% | 116,5 | 126 | 0,43  | 42,9  | 4,1  | 98.3% |
| ERX2465228  | 2000000 | 212976647 | 100.0% | 106,5 | 126 | 0,981 | 95    | 4    | 98.6% |
| ERX2465589  | 2000000 | 238271822 | 100.0% | 119,1 | 126 | 0,98  | 103,6 | 6,8  | 98.3% |
| ERX2465187  | 2000000 | 237653244 | 100.0% | 118,8 | 126 | 0,982 | 102,4 | 7,9  | 98.6% |
| ERX2465283  | 2000000 | 237222199 | 100.0% | 118,6 | 126 | 0,982 | 109   | 7    | 98.9% |
| ERX2465664* | 2000000 | 236687693 | 100.0% | 118,3 | 126 | 0,651 | 65,6  | 6,6  | 98.3% |
| ERX2465579  | 2000000 | 244579772 | 100.0% | 122,3 | 126 | 0,98  | 107,2 | 7,1  | 98.8% |
| ERX2465405  | 3275050 | 385980690 | 100.0% | 117,9 | 126 | 0,972 | 174,9 | 9,4  | 98.7% |
| ERX2465470  | 2000000 | 234109273 | 100.0% | 117,1 | 126 | 0,979 | 106,9 | 6,5  | 98.8% |
| ERX2465463  | 2165974 | 260973573 | 100.0% | 120,5 | 126 | 0,981 | 118,6 | 8    | 98.8% |
| ERX2465671  | 3054342 | 359924352 | 100.0% | 117,8 | 126 | 0,816 | 134,5 | 8,6  | 98.7% |
| ERX2465505  | 2000000 | 235950195 | 100.0% | 118   | 126 | 0,982 | 107   | 6,3  | 98.8% |
| ERX2465275  | 3838047 | 447861543 | 100.0% | 116,7 | 126 | 0,977 | 203,4 | 11,1 | 98.8% |
| ERX2465563  | 3089654 | 366846062 | 100.0% | 118,7 | 126 | 0,938 | 161,8 | 7,6  | 98.5% |
| ERX2465363  | 5468211 | 630730824 | 100.0% | 115,3 | 126 | 0,962 | 283,5 | 10,4 | 98.9% |
| ERX2465161  | 4581326 | 516726019 | 100.0% | 112,8 | 126 | 0,972 | 236,4 | 9,3  | 98.8% |
| ERX2465596  | 4017816 | 472250013 | 100.0% | 117,5 | 126 | 0,98  | 212,4 | 11,1 | 98.5% |
| ERX2465487  | 2343109 | 289081002 | 100.0% | 123,4 | 126 | 0,965 | 129,4 | 7    | 98.4% |
| ERX2465514* | 2000000 | 243667290 | 100.0% | 121,8 | 126 | 0,099 | 8,2   | 2,8  | 98.7% |
| ERX2465580  | 4002101 | 457213646 | 100.0% | 114,2 | 126 | 0,978 | 208,3 | 8    | 98.6% |
| ERX2465502  | 2248930 | 276837747 | 100.0% | 123,1 | 126 | 0,972 | 124,7 | 5,2  | 98.3% |
| ERX2465619  | 4491031 | 522188677 | 100.0% | 116,3 | 126 | 0,94  | 228,8 | 10   | 98.6% |
| ERX2465313  | 2647389 | 308219044 | 100.0% | 116,4 | 126 | 0,976 | 133,9 | 9,5  | 98.9% |
| ERX2465409  | 1284216 | 152892939 | 100.0% | 119,1 | 126 | 0,975 | 68,2  | 4,3  | 98.5% |
| ERX2465219  | 2902709 | 344315884 | 100.0% | 118,6 | 126 | 0,866 | 138,9 | 6,6  | 98.7% |
| ERX2465266  | 1868551 | 232939348 | 100.0% | 124,7 | 126 | 0,972 | 106,5 | 6,2  | 98.5% |

|            |         |           |        |       |     |       |       |      |       |
|------------|---------|-----------|--------|-------|-----|-------|-------|------|-------|
| ERX2465531 | 5207378 | 564449230 | 100.0% | 108,4 | 126 | 0,975 | 252,6 | 12,1 | 98.5% |
| ERX2465397 | 3749338 | 440549857 | 100.0% | 117,5 | 126 | 0,969 | 197,4 | 8    | 98.5% |
| ERX2465303 | 3378025 | 399599407 | 100.0% | 118,3 | 126 | 0,975 | 183,8 | 9,6  | 98.7% |
| ERX2465245 | 1350926 | 167188313 | 100.0% | 123,8 | 126 | 0,861 | 66,2  | 4,1  | 98.5% |
| ERX2465674 | 1769768 | 216680466 | 100.0% | 122,4 | 126 | 0,978 | 97,5  | 6,1  | 98.7% |
| ERX2465509 | 3305502 | 394431568 | 100.0% | 119,3 | 126 | 0,981 | 179,7 | 9,9  | 98.6% |
| ERX2465235 | 4653712 | 564097049 | 100.0% | 121,2 | 126 | 0,98  | 249,9 | 13,9 | 99.1% |
| ERX2465300 | 1984696 | 236046084 | 100.0% | 118,9 | 126 | 0,975 | 104,7 | 8,4  | 98.4% |
| ERX2465199 | 3042584 | 362900739 | 100.0% | 119,3 | 126 | 0,975 | 164,7 | 8,9  | 98.8% |
| ERX2465551 | 2703442 | 319299991 | 100.0% | 118,1 | 126 | 0,929 | 138,3 | 8,2  | 98.8% |
| ERX2465170 | 4016888 | 477199740 | 100.0% | 118,8 | 126 | 0,955 | 212,1 | 8,6  | 98.8% |
| ERX2465622 | 1782418 | 215171589 | 100.0% | 120,7 | 126 | 0,976 | 96,4  | 5,7  | 98.3% |
| ERX2465686 | 5096170 | 582089147 | 100.0% | 114,2 | 126 | 0,981 | 269   | 11,4 | 98.7% |
| ERX2465260 | 1999998 | 226014260 | 100.0% | 113   | 126 | 0,98  | 104,1 | 6,1  | 98.9% |
| ERX2465390 | 3870328 | 424091220 | 100.0% | 109,6 | 126 | 0,841 | 171,9 | 6,9  | 98.6% |
| ERX2465458 | 1393416 | 171636644 | 100.0% | 123,2 | 126 | 0,975 | 77,1  | 5    | 98.7% |
| ERX2465213 | 2391517 | 285867016 | 100.0% | 119,5 | 126 | 0,977 | 128,8 | 8,1  | 98.6% |
| ERX2465529 | 1825703 | 225299866 | 100.0% | 123,4 | 126 | 0,969 | 100,5 | 6,3  | 98.7% |
| ERX2465371 | 2176983 | 270070470 | 100.0% | 124,1 | 126 | 0,978 | 122,3 | 7,1  | 98.4% |
| ERX2465506 | 2000000 | 234501749 | 100.0% | 117,3 | 126 | 0,982 | 99,6  | 7,8  | 98.6% |
| ERX2465659 | 1517443 | 180823747 | 100.0% | 119,2 | 126 | 0,98  | 81,7  | 5,4  | 98.7% |
| ERX2465520 | 1951586 | 226080829 | 100.0% | 115,8 | 126 | 0,977 | 98,2  | 5,4  | 98.6% |
| ERX2465537 | 1780701 | 212974701 | 100.0% | 119,6 | 126 | 0,972 | 95,5  | 7,4  | 98.5% |
| ERX2465259 | 1744205 | 208864846 | 100.0% | 119,7 | 126 | 0,974 | 92,3  | 5,7  | 98.6% |
| ERX2465336 | 1493164 | 178225594 | 100.0% | 119,4 | 126 | 0,976 | 80,1  | 4,7  | 98.6% |
| ERX2465457 | 1918441 | 229857541 | 100.0% | 119,8 | 126 | 0,975 | 104,9 | 6    | 98.8% |
| ERX2465556 | 2128641 | 265310423 | 100.0% | 124,6 | 126 | 0,972 | 124,8 | 14   | 98.6% |
| ERX2465365 | 1712894 | 209210762 | 100.0% | 122,1 | 126 | 0,972 | 96,4  | 9,1  | 98.8% |
| ERX2465256 | 1862575 | 224183295 | 100.0% | 120,4 | 126 | 0,964 | 87,9  | 9    | 98.9% |
| ERX2465683 | 2809697 | 351246450 | 100.0% | 125   | 126 | 0,98  | 160,4 | 6,3  | 98.6% |
| ERX2465374 | 1832424 | 215700797 | 100.0% | 117,7 | 126 | 0,977 | 70,6  | 7    | 98.7% |
| ERX2465345 | 1927978 | 231309866 | 100.0% | 120   | 126 | 0,964 | 105,9 | 13,2 | 98.8% |
| ERX2465575 | 1851365 | 222193699 | 100.0% | 120   | 126 | 0,974 | 99,3  | 5,1  | 98.4% |
| ERX2465247 | 1817944 | 214226145 | 100.0% | 117,8 | 126 | 0,972 | 95,3  | 5,8  | 98.7% |
| ERX2465632 | 1938436 | 231828279 | 100.0% | 119,6 | 126 | 0,974 | 102,9 | 7,1  | 98.4% |
| ERX2465536 | 1838047 | 219294932 | 100.0% | 119,3 | 126 | 0,967 | 102,1 | 9,3  | 99.0% |
| ERX2465585 | 2012461 | 241514957 | 100.0% | 120   | 126 | 0,973 | 76,3  | 7,1  | 98.5% |
| ERX2465428 | 1958599 | 233279103 | 100.0% | 119,1 | 126 | 0,973 | 98,9  | 7,3  | 98.6% |
| ERX2465455 | 1945258 | 232505191 | 100.0% | 119,5 | 126 | 0,976 | 103,5 | 5,7  | 99.0% |
| ERX2465205 | 1605917 | 190816528 | 100.0% | 118,8 | 126 | 0,977 | 83,7  | 5,3  | 98.4% |
| ERX2465600 | 1287088 | 155753537 | 100.0% | 121   | 126 | 0,969 | 73,5  | 10,4 | 98.8% |
| ERX2465444 | 1591101 | 191867919 | 100.0% | 120,6 | 126 | 0,972 | 85,1  | 26   | 98.6% |
| ERX2465340 | 1974797 | 240388220 | 100.0% | 121,7 | 126 | 0,978 | 111,4 | 9,6  | 98.6% |
| ERX2465582 | 1787718 | 219251459 | 100.0% | 122,6 | 126 | 0,973 | 98,3  | 5,5  | 98.7% |
| ERX2465401 | 968340  | 117736882 | 100.0% | 121,6 | 126 | 0,976 | 52,7  | 3,5  | 98.6% |
| ERX2465450 | 4081953 | 490354191 | 100.0% | 120,1 | 126 | 0,981 | 223,9 | 13,5 | 98.7% |
| ERX2465443 | 4566862 | 561935977 | 100.0% | 123   | 126 | 0,971 | 252,3 | 12,9 | 98.6% |
| ERX2465528 | 890410  | 108980270 | 100.0% | 122,4 | 126 | 0,969 | 48,8  | 7,7  | 98.8% |

|             |         |           |        |       |     |       |       |      |       |
|-------------|---------|-----------|--------|-------|-----|-------|-------|------|-------|
| ERX2465431  | 1250056 | 151849903 | 100.0% | 121,5 | 126 | 0,967 | 67,8  | 5    | 98.8% |
| ERX2465367  | 2707302 | 327193484 | 100.0% | 120,9 | 126 | 0,975 | 146,2 | 8,8  | 98.6% |
| ERX2465251  | 2701739 | 329923973 | 100.0% | 122,1 | 126 | 0,98  | 148   | 8,2  | 98.4% |
| ERX2465479  | 1461464 | 175813194 | 100.0% | 120,3 | 126 | 0,959 | 78,1  | 6,4  | 98.8% |
| ERX2465513  | 853889  | 104254034 | 100.0% | 122,1 | 126 | 0,911 | 42    | 7,5  | 98.8% |
| ERX2465377  | 2588917 | 321150690 | 100.0% | 124   | 126 | 0,977 | 143,8 | 7,8  | 98.7% |
| ERX2465687  | 1364020 | 170843778 | 100.0% | 125,3 | 126 | 0,973 | 78    | 5,6  | 98.4% |
| ERX2465642  | 1836039 | 219853832 | 100.0% | 119,7 | 126 | 0,972 | 69,2  | 19,3 | 98.2% |
| ERX2465273  | 2149348 | 266558726 | 100.0% | 124   | 126 | 0,952 | 117,2 | 6,7  | 98.5% |
| ERX2465578  | 961753  | 119306677 | 100.0% | 124,1 | 126 | 0,919 | 50,7  | 3,4  | 98.7% |
| ERX2465524  | 801248  | 97315677  | 100.0% | 121,5 | 126 | 0,973 | 44,5  | 5,2  | 98.8% |
| ERX2465375  | 1840917 | 223667447 | 100.0% | 121,5 | 126 | 0,98  | 101,2 | 5,9  | 98.8% |
| ERX2465201* | 1900385 | 225225056 | 100.0% | 118,5 | 126 | 0,652 | 68,8  | 4    | 98.5% |
| ERX2465562  | 3072588 | 365572803 | 100.0% | 119   | 126 | 0,98  | 165,1 | 8,2  | 98.6% |
| ERX2465301  | 2504057 | 304242974 | 100.0% | 121,5 | 126 | 0,963 | 143,9 | 19,9 | 98.9% |
| ERX2465685  | 2268886 | 272967515 | 100.0% | 120,3 | 126 | 0,976 | 126,6 | 10,1 | 98.7% |
| ERX2465386  | 1829715 | 220458061 | 100.0% | 120,5 | 126 | 0,972 | 132,4 | 56,6 | 98.7% |
| ERX2465196  | 1266379 | 150841511 | 100.0% | 119,1 | 126 | 0,976 | 68,7  | 6,6  | 98.8% |
| ERX2465226  | 1774859 | 212824371 | 100.0% | 119,9 | 126 | 0,978 | 97,9  | 7    | 98.6% |
| ERX2465480  | 3742055 | 454952257 | 100.0% | 121,6 | 126 | 0,978 | 204,7 | 8,3  | 98.7% |
| ERX2465388  | 2000000 | 230450657 | 100.0% | 115,2 | 126 | 0,981 | 105   | 8,1  | 99.1% |
| ERX2465643  | 2571554 | 308378437 | 100.0% | 119,9 | 126 | 0,972 | 138,3 | 36,5 | 98.6% |
| ERX2465554  | 1978555 | 236012235 | 100.0% | 119,3 | 126 | 0,977 | 106,2 | 4,8  | 98.9% |
| ERX2465250  | 1327400 | 162739997 | 100.0% | 122,6 | 126 | 0,969 | 71,6  | 5,9  | 98.7% |
| ERX2465280  | 2403531 | 287501447 | 100.0% | 119,6 | 126 | 0,979 | 128,2 | 6,3  | 98.7% |
| ERX2465620  | 2159755 | 256446003 | 100.0% | 118,7 | 126 | 0,951 | 113,1 | 6    | 99.0% |
| ERX2465570  | 2000000 | 235088983 | 100.0% | 117,5 | 126 | 0,982 | 102,9 | 6,9  | 98.7% |
| ERX2465311  | 2000000 | 238155906 | 100.0% | 119,1 | 126 | 0,96  | 105   | 6,1  | 98.6% |
| ERX2465321  | 2000000 | 236432474 | 100.0% | 118,2 | 126 | 0,834 | 91,6  | 5,3  | 98.4% |
| ERX2465510  | 2000000 | 229976408 | 100.0% | 115   | 126 | 0,983 | 104   | 7,1  | 98.6% |
| ERX2465238  | 3024337 | 361531559 | 100.0% | 119,5 | 126 | 0,965 | 103,1 | 28,8 | 98.4% |
| ERX2465329  | 2977389 | 358308620 | 100.0% | 120,3 | 126 | 0,967 | 119,5 | 29,5 | 98.3% |
| ERX2465415  | 2935141 | 350727952 | 100.0% | 119,5 | 126 | 0,969 | 96,6  | 28,8 | 98.3% |
| ERX2465189  | 2821170 | 336638805 | 100.0% | 119,3 | 126 | 0,971 | 135,2 | 28,5 | 98.5% |
| ERX2465616  | 2125124 | 255726057 | 100.0% | 120,3 | 126 | 0,965 | 116,7 | 16   | 98.6% |
| ERX2465590  | 2730283 | 329352896 | 100.0% | 120,6 | 126 | 0,966 | 133,9 | 38   | 98.3% |
| ERX2465414  | 2758615 | 330310513 | 100.0% | 119,7 | 126 | 0,959 | 88,9  | 23,7 | 98.2% |
| ERX2465518  | 2035834 | 244918297 | 100.0% | 120,3 | 126 | 0,945 | 52,1  | 12   | 98.4% |
| ERX2465446  | 1755795 | 210590578 | 100.0% | 119,9 | 126 | 0,926 | 94,9  | 10,5 | 98.9% |
| ERX2465416  | 2886775 | 347565794 | 100.0% | 120,4 | 126 | 0,966 | 101,1 | 31,1 | 98.3% |
| ERX2465439  | 2469251 | 295677727 | 100.0% | 119,7 | 126 | 0,971 | 142,8 | 35,6 | 98.5% |
| ERX2465159  | 2510136 | 301812643 | 100.0% | 120,2 | 126 | 0,966 | 102,1 | 24,6 | 98.3% |
| ERX2465654  | 2080393 | 249502172 | 100.0% | 119,9 | 126 | 0,965 | 70,2  | 13,9 | 98.2% |
| ERX2465484  | 2233926 | 269470837 | 100.0% | 120,6 | 126 | 0,968 | 125,9 | 18   | 98.6% |
| ERX2465344  | 1840006 | 220954944 | 100.0% | 120,1 | 126 | 0,946 | 100,8 | 12,4 | 98.7% |
| ERX2465666  | 2000000 | 228145208 | 100.0% | 114,1 | 126 | 0,981 | 99,7  | 7,8  | 98.5% |
| ERX2465364  | 3551619 | 414496950 | 100.0% | 116,7 | 126 | 0,978 | 185,6 | 8,9  | 98.3% |
| ERX2465281  | 2000000 | 230015127 | 100.0% | 115   | 126 | 0,982 | 104,2 | 6,9  | 98.7% |

|             |         |           |        |       |     |       |       |      |       |
|-------------|---------|-----------|--------|-------|-----|-------|-------|------|-------|
| ERX2465566  | 2507514 | 300326197 | 100.0% | 119,8 | 126 | 0,971 | 154,6 | 39   | 98.5% |
| ERX2465612  | 2000000 | 229080272 | 100.0% | 114,5 | 126 | 0,98  | 92,2  | 8,1  | 98.4% |
| ERX2465667* | 1999999 | 223567205 | 100.0% | 111,8 | 126 | 0,085 | 1,3   | 1,6  | 99.6% |
| ERX2465681  | 2000000 | 234731081 | 100.0% | 117,4 | 126 | 0,926 | 95,1  | 6,5  | 98.5% |
| ERX2465285  | 2000000 | 233920341 | 100.0% | 117   | 126 | 0,979 | 104,4 | 6,8  | 99.0% |
| ERX2465350  | 1999999 | 232316995 | 100.0% | 116,2 | 126 | 0,98  | 99,7  | 6,9  | 98.6% |
| ERX2465241  | 1999999 | 233601095 | 100.0% | 116,8 | 126 | 0,982 | 98,1  | 7,3  | 98.3% |
| ERX2465592  | 3044578 | 364560449 | 100.0% | 119,7 | 126 | 0,969 | 171,6 | 18,1 | 99.0% |
| ERX2465611  | 986011  | 116626525 | 100.0% | 118,3 | 126 | 0,952 | 49,5  | 10,2 | 98.9% |
| ERX2465532  | 839676  | 99321229  | 100.0% | 118,3 | 126 | 0,946 | 41,4  | 7,9  | 98.7% |
| ERX2465166  | 1425380 | 167165637 | 100.0% | 117,3 | 126 | 0,956 | 53,5  | 15,9 | 98.5% |
| ERX2465404  | 1245724 | 147044410 | 100.0% | 118   | 126 | 0,952 | 57    | 16,4 | 98.3% |
| ERX2465433  | 2317647 | 290154421 | 100.0% | 125,2 | 126 | 0,978 | 131,3 | 7,9  | 98.9% |
| ERX2465432  | 1804416 | 214501060 | 100.0% | 118,9 | 126 | 0,943 | 69,6  | 13,1 | 98.4% |
| ERX2465356  | 2000000 | 226631246 | 100.0% | 113,3 | 126 | 0,983 | 102,8 | 5,6  | 98.6% |
| ERX2465214  | 2000000 | 224602569 | 100.0% | 112,3 | 126 | 0,979 | 99,7  | 6    | 98.6% |
| ERX2465218  | 2000000 | 224816120 | 100.0% | 112,4 | 126 | 0,98  | 101,6 | 6,2  | 98.2% |
| ERX2465451  | 723311  | 83670292  | 100.0% | 115,7 | 126 | 0,942 | 37,2  | 6,2  | 98.6% |
| ERX2465284  | 3051483 | 381746089 | 100.0% | 125,1 | 126 | 0,977 | 169,6 | 9,6  | 99.0% |
| ERX2465225  | 2000000 | 234947899 | 100.0% | 117,5 | 126 | 0,983 | 100   | 8,6  | 98.7% |
| ERX2465419  | 2000000 | 234677832 | 100.0% | 117,3 | 126 | 0,985 | 105,4 | 5,4  | 98.7% |
| ERX2465606  | 1911836 | 230238867 | 100.0% | 120,4 | 126 | 0,956 | 73,5  | 15,4 | 98.5% |
| ERX2465328  | 2000000 | 223741752 | 100.0% | 111,9 | 126 | 0,983 | 102   | 4,5  | 98.6% |
| ERX2465488  | 2000000 | 226602381 | 100.0% | 113,3 | 126 | 0,978 | 102,7 | 6,5  | 98.5% |
| ERX2465639  | 2944407 | 346714147 | 100.0% | 117,8 | 126 | 0,988 | 157,8 | 7,5  | 99.1% |
| ERX2465183  | 1363135 | 165092770 | 100.0% | 121,1 | 126 | 0,96  | 56,2  | 16   | 98.4% |
| ERX2465478  | 3040528 | 355157593 | 100.0% | 116,8 | 126 | 0,978 | 161,3 | 7,6  | 98.8% |
| ERX2465464  | 3551229 | 403780920 | 100.0% | 113,7 | 126 | 0,972 | 182,9 | 10,3 | 99.1% |
| ERX2465644  | 2797115 | 329706443 | 100.0% | 117,9 | 126 | 0,977 | 151,3 | 6,9  | 98.7% |
| ERX2465202  | 1406238 | 170979791 | 100.0% | 121,6 | 126 | 0,957 | 72,7  | 20   | 98.4% |
| ERX2465212  | 1649222 | 196078887 | 100.0% | 118,9 | 126 | 0,972 | 92,3  | 8,2  | 98.9% |
| ERX2465670  | 3201008 | 375367879 | 100.0% | 117,3 | 126 | 0,97  | 196,6 | 51,6 | 98.8% |
| ERX2465406  | 3144674 | 376699087 | 100.0% | 119,8 | 126 | 0,98  | 170,1 | 9,1  | 98.6% |
| ERX2465299  | 1572979 | 188752265 | 100.0% | 120   | 126 | 0,9   | 21,8  | 4,9  | 98.3% |
| ERX2465501  | 2405406 | 283450208 | 100.0% | 117,8 | 126 | 0,957 | 82,2  | 14,3 | 98.9% |
| ERX2465511  | 3073156 | 366116273 | 100.0% | 119,1 | 126 | 0,985 | 170   | 8,8  | 98.7% |
| ERX2465157  | 1907101 | 229155902 | 100.0% | 120,2 | 126 | 0,938 | 45,4  | 9,2  | 98.4% |
| ERX2465519  | 1911700 | 227165799 | 100.0% | 118,8 | 126 | 0,931 | 38,6  | 8,7  | 98.1% |
| ERX2465232  | 1533091 | 184008565 | 100.0% | 120   | 126 | 0,941 | 42    | 12   | 98.3% |
| ERX2465663  | 1698117 | 205949872 | 100.0% | 121,3 | 126 | 0,953 | 63,1  | 12,9 | 98.2% |
| ERX2465167  | 2774972 | 323695664 | 100.0% | 116,6 | 126 | 0,977 | 146,7 | 7,7  | 98.7% |
| ERX2465462  | 2961024 | 353640124 | 100.0% | 119,4 | 126 | 0,978 | 157,4 | 9,5  | 98.6% |
| ERX2465627  | 2589944 | 303299573 | 100.0% | 117,1 | 126 | 0,947 | 134   | 7,8  | 98.7% |
| ERX2465308* | 1557668 | 181317082 | 100.0% | 116,4 | 126 | 0,636 | 55,1  | 12,7 | 98.4% |
| ERX2465661  | 4266163 | 500558033 | 100.0% | 117,3 | 126 | 0,987 | 233,3 | 7,5  | 98.8% |
| ERX2465626  | 1993433 | 237292139 | 100.0% | 119   | 126 | 0,965 | 109,8 | 10,4 | 99.0% |
| ERX2465581  | 2286983 | 269795522 | 100.0% | 118   | 126 | 0,977 | 120,7 | 8,8  | 98.5% |
| ERX2465655  | 2353679 | 286205627 | 100.0% | 121,6 | 126 | 0,963 | 198,5 | 85,8 | 98.7% |

|             |         |           |        |       |     |       |       |      |       |
|-------------|---------|-----------|--------|-------|-----|-------|-------|------|-------|
| ERX2465500  | 1962829 | 235572341 | 100.0% | 120   | 126 | 0,97  | 111,9 | 15,7 | 98.7% |
| ERX2465237  | 1860820 | 221978513 | 100.0% | 119,3 | 126 | 0,907 | 44,6  | 9,9  | 98.1% |
| ERX2465669  | 1762865 | 210844499 | 100.0% | 119,6 | 126 | 0,958 | 55,3  | 12,6 | 98.4% |
| ERX2465517  | 1873465 | 230656624 | 100.0% | 123,1 | 126 | 0,98  | 79,5  | 6,8  | 98.5% |
| ERX2465605  | 4427592 | 509576823 | 100.0% | 115,1 | 126 | 0,762 | 180,2 | 10,5 | 98.8% |
| ERX2465447  | 3516597 | 424968855 | 100.0% | 120,8 | 126 | 0,979 | 185,2 | 12,7 | 98.2% |
| ERX2465460  | 2000000 | 238312701 | 100.0% | 119,2 | 126 | 0,98  | 104,6 | 7,6  | 98.4% |
| ERX2465267  | 1661813 | 197198500 | 100.0% | 118,7 | 126 | 0,841 | 89,6  | 37,1 | 98.7% |
| ERX2465521  | 2068277 | 246767651 | 100.0% | 119,3 | 126 | 0,976 | 112   | 5,7  | 98.6% |
| ERX2465650  | 2157025 | 262106222 | 100.0% | 121,5 | 126 | 0,96  | 103,7 | 23   | 98.5% |
| ERX2465651  | 1432383 | 175594472 | 100.0% | 122,6 | 126 | 0,947 | 51,5  | 16,4 | 98.5% |
| ERX2465378  | 2563293 | 298934684 | 100.0% | 116,6 | 126 | 0,977 | 135,3 | 7,1  | 98.6% |
| ERX2465191  | 1999999 | 245933232 | 100.0% | 123   | 126 | 0,978 | 109,1 | 7,4  | 98.5% |
| ERX2465630  | 1559101 | 187446134 | 100.0% | 120,2 | 126 | 0,963 | 80,7  | 22,4 | 98.3% |
| ERX2465469  | 2245947 | 265226681 | 100.0% | 118,1 | 126 | 0,976 | 122   | 6,8  | 98.7% |
| ERX2465574  | 1795979 | 216486472 | 100.0% | 120,5 | 126 | 0,939 | 34,6  | 6,7  | 98.3% |
| ERX2465352  | 2148476 | 259472939 | 100.0% | 120,8 | 126 | 0,976 | 60,8  | 15,4 | 98.3% |
| ERX2465257  | 2259284 | 268732797 | 100.0% | 118,9 | 126 | 0,978 | 121,6 | 6,4  | 98.7% |
| ERX2465569  | 1705028 | 204648885 | 100.0% | 120   | 126 | 0,974 | 92,4  | 5,5  | 99.0% |
| ERX2465298  | 1956032 | 234064372 | 100.0% | 119,7 | 126 | 0,945 | 63,8  | 14,4 | 98.1% |
| ERX2465545  | 2487693 | 291785823 | 100.0% | 117,3 | 126 | 0,971 | 116,2 | 7,9  | 98.6% |
| ERX2465679  | 1530919 | 182977176 | 100.0% | 119,5 | 126 | 0,942 | 60,5  | 17,5 | 98.8% |
| ERX2465682  | 1458863 | 173440613 | 100.0% | 118,9 | 126 | 0,972 | 77,7  | 5,5  | 98.6% |
| ERX2465515  | 4142652 | 483500421 | 100.0% | 116,7 | 126 | 0,985 | 219,2 | 9,7  | 98.6% |
| ERX2465657* | 2000000 | 224461519 | 100.0% | 112,2 | 126 | 0,597 | 57    | 6,6  | 98.7% |
| ERX2465272  | 2041254 | 244026465 | 100.0% | 119,5 | 126 | 0,976 | 110   | 5,3  | 98.5% |
| ERX2465602  | 1918265 | 230404823 | 100.0% | 120,1 | 126 | 0,959 | 96,6  | 15,1 | 98.4% |
| ERX2465535  | 1904695 | 228629457 | 100.0% | 120   | 126 | 0,966 | 103,3 | 13,8 | 98.7% |
| ERX2465452  | 2032953 | 239369164 | 100.0% | 117,7 | 126 | 0,973 | 98,8  | 7,8  | 98.3% |
| ERX2465617  | 3326376 | 381516319 | 100.0% | 114,7 | 126 | 0,976 | 166,6 | 12,5 | 98.3% |
| ERX2465690  | 2186020 | 270155681 | 100.0% | 123,6 | 126 | 0,97  | 120,9 | 6,8  | 98.7% |
| ERX2465382  | 3552117 | 421119206 | 100.0% | 118,6 | 126 | 0,976 | 190,4 | 10,4 | 98.6% |
| ERX2465351  | 3727762 | 439876209 | 100.0% | 118   | 126 | 0,971 | 197,8 | 12,6 | 98.5% |
| ERX2465274  | 3676254 | 428123362 | 100.0% | 116,5 | 126 | 0,975 | 156,2 | 12,1 | 98.6% |
| ERX2465316  | 1999999 | 234994508 | 100.0% | 117,5 | 126 | 0,963 | 101,3 | 6,6  | 98.4% |
| ERX2465217  | 3640381 | 424423617 | 100.0% | 116,6 | 126 | 0,974 | 189,5 | 10,6 | 98.5% |
| ERX2465249  | 3315897 | 407746411 | 100.0% | 123   | 126 | 0,978 | 185   | 9,3  | 98.7% |
| ERX2465290  | 1485495 | 183341250 | 100.0% | 123,4 | 126 | 0,977 | 83,2  | 4,3  | 98.7% |
| ERX2465164  | 6005593 | 718401158 | 100.0% | 119,6 | 126 | 0,972 | 202,9 | 60   | 98.2% |
| ERX2465403  | 2627092 | 310726411 | 100.0% | 118,3 | 126 | 0,973 | 140,1 | 6,8  | 99.0% |
| ERX2465348  | 2000000 | 248273349 | 100.0% | 124,1 | 126 | 0,978 | 110   | 6,5  | 98.4% |
| ERX2465248  | 3494061 | 399381547 | 100.0% | 114,3 | 126 | 0,958 | 176,8 | 10,6 | 98.7% |
| ERX2465224  | 4621858 | 542053353 | 100.0% | 117,3 | 126 | 0,975 | 232,8 | 11,9 | 98.9% |
| ERX2465240  | 1649096 | 201455239 | 100.0% | 122,2 | 126 | 0,86  | 49,3  | 9,6  | 97.9% |
| ERX2465542  | 3035398 | 376474049 | 100.0% | 124   | 126 | 0,972 | 215,4 | 73,3 | 98.6% |
| ERX2465402  | 3015635 | 363155207 | 100.0% | 120,4 | 126 | 0,958 | 68,9  | 15,2 | 98.2% |
| ERX2465193  | 2550655 | 311980047 | 100.0% | 122,3 | 126 | 0,959 | 61,5  | 12,5 | 98.5% |
| ERX2465370  | 2747532 | 340542787 | 100.0% | 123,9 | 126 | 0,959 | 154,5 | 10,7 | 98.9% |

|             |         |           |        |       |     |       |       |      |       |
|-------------|---------|-----------|--------|-------|-----|-------|-------|------|-------|
| ERX2465467  | 3083883 | 348433716 | 100.0% | 113   | 126 | 0,969 | 136,2 | 13   | 98.4% |
| ERX2465558  | 1994952 | 243908528 | 100.0% | 122,3 | 126 | 0,973 | 109,1 | 6,3  | 98.5% |
| ERX2465656  | 3188840 | 387964758 | 100.0% | 121,7 | 126 | 0,975 | 175   | 14,6 | 98.8% |
| ERX2465381  | 2162446 | 271019384 | 100.0% | 125,3 | 126 | 0,976 | 118,9 | 6,3  | 98.2% |
| ERX2465561  | 2069702 | 252146878 | 100.0% | 121,8 | 126 | 0,967 | 115,9 | 17,5 | 98.9% |
| ERX2465295  | 2484941 | 300826116 | 100.0% | 121,1 | 126 | 0,975 | 132,9 | 9,1  | 98.5% |
| ERX2465459  | 2349459 | 284381722 | 100.0% | 121   | 126 | 0,973 | 128,1 | 6,7  | 98.6% |
| ERX2465342  | 2383696 | 289056894 | 100.0% | 121,3 | 126 | 0,974 | 117,5 | 8,7  | 98.4% |
| ERX2465613  | 1999999 | 234875726 | 100.0% | 117,4 | 126 | 0,973 | 103,6 | 7,4  | 98.7% |
| ERX2465243  | 2034350 | 252469402 | 100.0% | 124,1 | 126 | 0,97  | 116,5 | 11,3 | 98.6% |
| ERX2465421  | 1762222 | 218982351 | 100.0% | 124,3 | 126 | 0,973 | 98,2  | 6    | 98.5% |
| ERX2465252  | 3339675 | 396493016 | 100.0% | 118,7 | 126 | 0,979 | 175,4 | 8,5  | 98.1% |
| ERX2465265  | 2036866 | 252818748 | 100.0% | 124,1 | 126 | 0,959 | 54,4  | 14,6 | 98.6% |
| ERX2465499  | 2581272 | 313856436 | 100.0% | 121,6 | 126 | 0,963 | 89,3  | 26,1 | 98.3% |
| ERX2465354  | 1518817 | 183127643 | 100.0% | 120,6 | 126 | 0,931 | 22,6  | 5,3  | 98.3% |
| ERX2465423  | 2819238 | 336741955 | 100.0% | 119,4 | 126 | 0,976 | 148,9 | 8,4  | 98.5% |
| ERX2465297  | 2904887 | 341085571 | 100.0% | 117,4 | 126 | 0,975 | 148,8 | 8,6  | 98.4% |
| ERX2465680  | 1791264 | 216698386 | 100.0% | 121   | 126 | 0,964 | 97,7  | 8,3  | 98.6% |
| ERX2465385  | 2600065 | 321188173 | 100.0% | 123,5 | 126 | 0,974 | 154,6 | 37,2 | 98.6% |
| ERX2465527  | 1845404 | 223915905 | 100.0% | 121,3 | 126 | 0,973 | 106,4 | 14,2 | 98.6% |
| ERX2465182  | 2574450 | 319009640 | 100.0% | 123,9 | 126 | 0,983 | 146,2 | 7,6  | 98.8% |
| ERX2465179  | 3190060 | 387338492 | 100.0% | 121,4 | 126 | 0,973 | 192,5 | 46,7 | 98.8% |
| ERX2465425  | 1259416 | 153398615 | 100.0% | 121,8 | 126 | 0,971 | 67    | 5    | 98.7% |
| ERX2465271  | 3594608 | 410432920 | 100.0% | 114,2 | 126 | 0,977 | 176,8 | 14,1 | 98.6% |
| ERX2465493  | 1662036 | 203392124 | 100.0% | 122,4 | 126 | 0,946 | 94,8  | 20,3 | 98.4% |
| ERX2465277  | 2535080 | 305683587 | 100.0% | 120,6 | 126 | 0,948 | 66,9  | 16,2 | 98.2% |
| ERX2465332  | 2711792 | 329833158 | 100.0% | 121,6 | 126 | 0,979 | 145,8 | 8,3  | 98.4% |
| ERX2465426  | 2663209 | 325159232 | 100.0% | 122,1 | 126 | 0,968 | 64,9  | 16,6 | 98.3% |
| ERX2465599  | 3287354 | 398674787 | 100.0% | 121,3 | 126 | 0,972 | 178,4 | 32,5 | 98.4% |
| ERX2465560  | 3464266 | 394951812 | 100.0% | 114   | 126 | 0,978 | 174,5 | 14,8 | 98.2% |
| ERX2465353  | 3414044 | 395720369 | 100.0% | 115,9 | 126 | 0,977 | 168,7 | 13,3 | 98.4% |
| ERX2465172  | 2000000 | 245043722 | 100.0% | 122,5 | 126 | 0,973 | 111,3 | 5,5  | 98.7% |
| ERX2465483* | 2171643 | 263578057 | 100.0% | 121,4 | 126 | 0,597 | 25,8  | 9,2  | 98.5% |
| ERX2465494  | 2953724 | 350988423 | 100.0% | 118,8 | 126 | 0,965 | 156,4 | 8,4  | 98.7% |
| ERX2465325  | 2000000 | 234003815 | 100.0% | 117   | 126 | 0,971 | 89,2  | 7,1  | 98.4% |
| ERX2465291  | 1763714 | 214056530 | 100.0% | 121,4 | 126 | 0,976 | 95,6  | 5,5  | 98.6% |
| ERX2465322  | 2618360 | 324838012 | 100.0% | 124,1 | 126 | 0,979 | 142,7 | 9    | 98.5% |
| ERX2465552  | 2423718 | 299904376 | 100.0% | 123,7 | 126 | 0,967 | 135,2 | 6,3  | 98.7% |
| ERX2465178  | 2224838 | 269965007 | 100.0% | 121,3 | 126 | 0,974 | 119   | 8,5  | 98.4% |
| ERX2465598  | 2776842 | 343493646 | 100.0% | 123,7 | 126 | 0,98  | 155,3 | 7,7  | 98.6% |
| ERX2465435  | 3327662 | 396877433 | 100.0% | 119,3 | 126 | 0,978 | 180,3 | 9,3  | 98.6% |
| ERX2465604  | 3558531 | 432508811 | 100.0% | 121,5 | 126 | 0,98  | 192,7 | 11,3 | 98.3% |
| ERX2465475  | 1931511 | 238966165 | 100.0% | 123,7 | 126 | 0,97  | 109,8 | 7,3  | 98.6% |
| ERX2465658  | 2413063 | 290258461 | 100.0% | 120,3 | 126 | 0,977 | 131,7 | 7,3  | 98.7% |
| ERX2465376  | 2853375 | 352508986 | 100.0% | 123,5 | 126 | 0,978 | 158,3 | 7,5  | 98.5% |
| ERX2465279  | 2228216 | 269610906 | 100.0% | 121   | 126 | 0,977 | 121,6 | 6,7  | 98.6% |
| ERX2465586  | 2396481 | 280686712 | 100.0% | 117,1 | 126 | 0,977 | 126,3 | 7,7  | 98.4% |
| ERX2465546  | 2057002 | 249141865 | 100.0% | 121,1 | 126 | 0,933 | 106,7 | 6,4  | 98.2% |

|             |         |           |        |       |     |       |       |      |       |
|-------------|---------|-----------|--------|-------|-----|-------|-------|------|-------|
| ERX2465676  | 1647483 | 200632694 | 100.0% | 121,8 | 126 | 0,967 | 89,7  | 5,7  | 98.7% |
| ERX2465564  | 2142105 | 263140277 | 100.0% | 122,8 | 126 | 0,971 | 117,3 | 7,4  | 98.6% |
| ERX2465541  | 2001241 | 242077095 | 100.0% | 121   | 126 | 0,973 | 109,5 | 7,4  | 98.7% |
| ERX2465195  | 2681165 | 319995629 | 100.0% | 119,3 | 126 | 0,971 | 142,9 | 8,9  | 98.6% |
| ERX2465618  | 3499334 | 433403416 | 100.0% | 123,9 | 126 | 0,981 | 198,8 | 7,7  | 98.6% |
| ERX2465230  | 3428897 | 416617487 | 100.0% | 121,5 | 126 | 0,981 | 189,2 | 9,7  | 98.7% |
| ERX2465434  | 1823876 | 220911379 | 100.0% | 121,1 | 126 | 0,971 | 99,6  | 7,4  | 98.8% |
| ERX2465634  | 2812544 | 339587830 | 100.0% | 120,7 | 126 | 0,958 | 147,2 | 27,6 | 99.0% |
| ERX2465565  | 3253273 | 402293140 | 100.0% | 123,7 | 126 | 0,974 | 184,3 | 8,7  | 99.1% |
| ERX2465398  | 1573836 | 189966702 | 100.0% | 120,7 | 126 | 0,969 | 85,5  | 4,8  | 99.0% |
| ERX2465417  | 3233163 | 391397427 | 100.0% | 121,1 | 126 | 0,977 | 177,2 | 8,8  | 99.0% |
| ERX2465287  | 2996442 | 357267306 | 100.0% | 119,2 | 126 | 0,974 | 159,2 | 9,7  | 98.6% |
| ERX2465496  | 2199879 | 271003889 | 100.0% | 123,2 | 126 | 0,974 | 122,6 | 7    | 99.0% |
| ERX2465197  | 2865486 | 346313786 | 100.0% | 120,9 | 126 | 0,977 | 147,6 | 10,9 | 98.4% |
| ERX2465491  | 2222816 | 276643583 | 100.0% | 124,5 | 126 | 0,973 | 122,6 | 6,8  | 98.4% |
| ERX2465269* | 4244274 | 499398228 | 100.0% | 117,7 | 126 | 0,372 | 88,4  | 6,8  | 98.6% |
| ERX2465572  | 2858945 | 345152877 | 100.0% | 120,7 | 126 | 0,975 | 150,9 | 8,8  | 99.0% |
| ERX2465629  | 2000000 | 237996231 | 100.0% | 119   | 126 | 0,982 | 107,9 | 6,6  | 98.5% |
| ERX2465436  | 3034508 | 349551745 | 100.0% | 115,2 | 126 | 0,977 | 160,4 | 10,7 | 99.1% |
| ERX2465233  | 2050688 | 251697444 | 100.0% | 122,7 | 126 | 0,973 | 114   | 7    | 98.9% |
| ERX2465175  | 2420267 | 294758908 | 100.0% | 121,8 | 126 | 0,961 | 130,8 | 7,6  | 98.7% |
| ERX2465607  | 2318695 | 281877123 | 100.0% | 121,6 | 126 | 0,969 | 125,4 | 6,9  | 98.2% |
| ERX2465306  | 3282323 | 381808632 | 100.0% | 116,3 | 126 | 0,975 | 165,7 | 12,1 | 98.4% |
| ERX2465320  | 2139812 | 263711875 | 100.0% | 123,2 | 126 | 0,977 | 119,4 | 6,3  | 98.8% |
| ERX2465472  | 3415771 | 420810099 | 100.0% | 123,2 | 126 | 0,98  | 180,5 | 12,5 | 98.4% |
| ERX2465310  | 1263631 | 151216103 | 100.0% | 119,7 | 126 | 0,971 | 67,7  | 4,8  | 98.7% |
| ERX2465668  | 3440203 | 412143297 | 100.0% | 119,8 | 126 | 0,974 | 183,6 | 9,3  | 98.6% |
| ERX2465430  | 2049866 | 246563989 | 100.0% | 120,3 | 126 | 0,966 | 106,6 | 7,4  | 98.7% |
| ERX2465387  | 3429906 | 410162619 | 100.0% | 119,6 | 126 | 0,974 | 183,9 | 9,9  | 98.5% |
| ERX2465156  | 2938218 | 362151939 | 100.0% | 123,3 | 126 | 0,977 | 163,9 | 7,4  | 98.6% |
| ERX2465333  | 2779930 | 325531847 | 100.0% | 117,1 | 126 | 0,975 | 144,5 | 8,9  | 98.4% |
| ERX2465442  | 2365931 | 293416067 | 100.0% | 124   | 126 | 0,979 | 129,5 | 7    | 98.8% |
| ERX2465609  | 1058644 | 129671410 | 100.0% | 122,5 | 126 | 0,975 | 58,2  | 3,8  | 98.5% |
| ERX2465468  | 3208935 | 383003896 | 100.0% | 119,4 | 126 | 0,975 | 170,8 | 8,5  | 98.4% |
| ERX2465174  | 1048956 | 128749447 | 100.0% | 122,7 | 126 | 0,965 | 56,8  | 4,2  | 98.6% |
| ERX2465326  | 2331220 | 285925577 | 100.0% | 122,7 | 126 | 0,962 | 127,5 | 7,2  | 98.8% |
| ERX2465544  | 2160919 | 260432801 | 100.0% | 120,5 | 126 | 0,976 | 116,9 | 7,4  | 98.2% |
| ERX2465368  | 2136830 | 263098228 | 100.0% | 123,1 | 126 | 0,977 | 116,4 | 7,1  | 98.6% |
| ERX2465347  | 1151816 | 142730610 | 100.0% | 123,9 | 126 | 0,966 | 65,8  | 7,7  | 98.7% |
| ERX2465220  | 2410365 | 299824757 | 100.0% | 124,4 | 126 | 0,975 | 134,5 | 7,5  | 98.6% |
| ERX2465181  | 2014675 | 243764215 | 100.0% | 121   | 126 | 0,972 | 108,4 | 6,2  | 99.0% |
| ERX2465158  | 2365302 | 291675766 | 100.0% | 123,3 | 126 | 0,975 | 132,4 | 6,8  | 98.9% |
| ERX2465207  | 2462624 | 305629467 | 100.0% | 124,1 | 126 | 0,946 | 134   | 7    | 98.8% |
| ERX2465379  | 1721281 | 210030452 | 100.0% | 122   | 126 | 0,962 | 85,7  | 21,8 | 98.1% |
| ERX2465358  | 2985932 | 365942579 | 100.0% | 122,6 | 126 | 0,981 | 165,5 | 9    | 98.8% |
| ERX2465530  | 1753930 | 217061206 | 100.0% | 123,8 | 126 | 0,964 | 97,3  | 5    | 98.6% |
| ERX2465366  | 2128892 | 262396552 | 100.0% | 123,3 | 126 | 0,979 | 119,7 | 4,9  | 98.8% |
| ERX2465497  | 1999999 | 239029617 | 100.0% | 119,5 | 126 | 0,977 | 105,4 | 7,4  | 99.0% |

|             |         |           |        |       |     |       |       |      |       |
|-------------|---------|-----------|--------|-------|-----|-------|-------|------|-------|
| ERX2465429  | 2335230 | 288172370 | 100.0% | 123,4 | 126 | 0,975 | 129,7 | 8,2  | 99.0% |
| ERX2465305  | 2536018 | 310350048 | 100.0% | 122,4 | 126 | 0,978 | 130,4 | 8,5  | 98.0% |
| ERX2465341  | 2663394 | 326949882 | 100.0% | 122,8 | 126 | 0,979 | 151,7 | 7,8  | 99.1% |
| ERX2465163  | 755568  | 93630385  | 100.0% | 123,9 | 126 | 0,854 | 37,1  | 2,5  | 98.6% |
| ERX2465538* | 1506579 | 179215384 | 100.0% | 119   | 126 | 0,634 | 53,2  | 4,2  | 98.5% |
| ERX2465649* | 1832831 | 226071639 | 100.0% | 123,3 | 126 | 0,501 | 52,8  | 4,3  | 99.0% |
| ERX2465383  | 1581557 | 191487573 | 100.0% | 121,1 | 126 | 0,966 | 85,4  | 5,5  | 98.9% |
| ERX2465482  | 3676367 | 434149051 | 100.0% | 118,1 | 126 | 0,976 | 196,5 | 8,8  | 99.0% |
| ERX2465393  | 1453962 | 175282015 | 100.0% | 120,6 | 126 | 0,953 | 76,2  | 5,2  | 98.6% |
| ERX2465165  | 2314734 | 274773813 | 100.0% | 118,7 | 126 | 0,849 | 109,1 | 6    | 98.5% |
| ERX2465637  | 2187610 | 262599664 | 100.0% | 120   | 126 | 0,917 | 111,8 | 6,9  | 98.7% |
| ERX2465261  | 2501557 | 302516014 | 100.0% | 120,9 | 126 | 0,979 | 137,7 | 8,2  | 98.7% |
| ERX2465489  | 2876506 | 340343800 | 100.0% | 118,3 | 126 | 0,967 | 146,5 | 11,1 | 98.4% |
| ERX2465456* | 3997583 | 468057252 | 100.0% | 117,1 | 126 | 0,212 | 47,1  | 3,6  | 98.5% |
| ERX2465410  | 2193836 | 263997406 | 100.0% | 120,3 | 126 | 0,981 | 119   | 7,7  | 98.7% |
| ERX2465407  | 1723073 | 207234473 | 100.0% | 120,3 | 126 | 0,976 | 92,8  | 6,2  | 98.5% |
| ERX2465636  | 2007403 | 244851433 | 100.0% | 122   | 126 | 0,936 | 111,8 | 14,9 | 98.7% |
| ERX2465595  | 1521566 | 189168838 | 100.0% | 124,3 | 126 | 0,972 | 86,3  | 4    | 98.8% |
| ERX2465550  | 2096533 | 253130418 | 100.0% | 120,7 | 126 | 0,975 | 114,2 | 6,7  | 98.2% |
| ERX2465638  | 2692285 | 330374684 | 100.0% | 122,7 | 126 | 0,981 | 150,9 | 7    | 98.8% |
| ERX2465445  | 1566575 | 193622887 | 100.0% | 123,6 | 126 | 0,887 | 79,3  | 4,5  | 98.7% |
| ERX2465665  | 2193120 | 260633201 | 100.0% | 118,8 | 126 | 0,949 | 114,3 | 6,1  | 98.3% |
| ERX2465294  | 1569267 | 190049228 | 100.0% | 121,1 | 126 | 0,969 | 84,5  | 5,9  | 99.0% |
| ERX2465677  | 2676090 | 316191090 | 100.0% | 118,2 | 126 | 0,971 | 139,3 | 9,3  | 98.4% |
| ERX2465369  | 1879908 | 226881691 | 100.0% | 120,7 | 126 | 0,977 | 103,1 | 7,1  | 98.8% |
| ERX2465490* | 2292059 | 275378061 | 100.0% | 120,1 | 126 | 0,485 | 63,6  | 4,1  | 98.7% |
| ERX2465173  | 1691617 | 205058677 | 100.0% | 121,2 | 126 | 0,876 | 82,9  | 5,6  | 98.6% |
| ERX2465318  | 2175300 | 255132131 | 100.0% | 117,3 | 126 | 0,978 | 113,3 | 8,3  | 98.6% |
| ERX2465359* | 2000000 | 233395513 | 100.0% | 116,7 | 126 | 0,7   | 77,8  | 4,3  | 99.0% |
| ERX2465246  | 1676626 | 206168184 | 100.0% | 123   | 126 | 0,946 | 89,8  | 5,7  | 98.7% |
| ERX2465355  | 1547265 | 187024677 | 100.0% | 120,9 | 126 | 0,968 | 83    | 5,4  | 98.5% |
| ERX2465645* | 2840116 | 330181972 | 100.0% | 116,3 | 126 | 0,438 | 65,6  | 5,5  | 98.5% |
| ERX2465194  | 1655200 | 195413129 | 100.0% | 118,1 | 126 | 0,908 | 82    | 5,8  | 98.5% |
| ERX2465547  | 943511  | 117218739 | 100.0% | 124,2 | 126 | 0,968 | 52,3  | 3    | 98.7% |
| ERX2465621* | 4030952 | 463486973 | 100.0% | 115   | 126 | 0,068 | 15,6  | 2,4  | 99.0% |
| ERX2465229  | 2200843 | 266156590 | 100.0% | 120,9 | 126 | 0,977 | 119,7 | 8,4  | 98.6% |
| ERX2465216  | 2277936 | 274218545 | 100.0% | 120,4 | 126 | 0,988 | 125,9 | 7,7  | 98.7% |
| ERX2465648  | 2095161 | 248325677 | 100.0% | 118,5 | 126 | 0,916 | 106   | 6,8  | 98.8% |
| ERX2465412  | 1780280 | 220472193 | 100.0% | 123,8 | 126 | 0,946 | 96,8  | 4,9  | 98.6% |
| ERX2465678  | 1765212 | 218184820 | 100.0% | 123,6 | 126 | 0,98  | 99,6  | 5,4  | 98.7% |
| ERX2465258  | 2665586 | 324956349 | 100.0% | 121,9 | 126 | 0,974 | 144,8 | 9,3  | 98.3% |
| ERX2465471  | 1065493 | 131002923 | 100.0% | 123   | 126 | 0,828 | 50,3  | 3,7  | 98.6% |
| ERX2465160  | 1322005 | 159793850 | 100.0% | 120,9 | 126 | 0,979 | 71,5  | 4,6  | 98.5% |
| ERX2465204  | 1762996 | 213525459 | 100.0% | 121,1 | 126 | 0,73  | 73,3  | 4,9  | 98.6% |
| ERX2465555  | 1858552 | 231444392 | 100.0% | 124,5 | 126 | 0,968 | 103,6 | 5,7  | 98.7% |
| ERX2465448  | 3369640 | 415448499 | 100.0% | 123,3 | 126 | 0,972 | 188,6 | 7,3  | 98.8% |
| ERX2465338  | 1553957 | 191806496 | 100.0% | 123,4 | 126 | 0,879 | 80,4  | 4,3  | 99.0% |
| ERX2465184  | 1514003 | 188293698 | 100.0% | 124,4 | 126 | 0,97  | 85,4  | 5,1  | 98.7% |

|             |         |           |        |       |     |       |       |      |       |
|-------------|---------|-----------|--------|-------|-----|-------|-------|------|-------|
| ERX2465309  | 2859875 | 350774837 | 100.0% | 122,7 | 126 | 0,975 | 156,6 | 10,3 | 98.5% |
| ERX2465244  | 2476611 | 295002291 | 100.0% | 119,1 | 126 | 0,937 | 129,2 | 7,6  | 98.7% |
| ERX2465349* | 3468701 | 394161573 | 100.0% | 113,6 | 126 | 0,565 | 105,7 | 11,8 | 98.6% |
| ERX2465334  | 1999983 | 244716719 | 100.0% | 122,4 | 126 | 0,969 | 109,2 | 5,9  | 98.6% |
| ERX2465339  | 3574338 | 429509051 | 100.0% | 120,2 | 126 | 0,968 | 194,4 | 8,2  | 98.7% |
| ERX2465177  | 1971904 | 233472341 | 100.0% | 118,4 | 126 | 0,973 | 104,6 | 6    | 98.3% |
| ERX2465327  | 1713840 | 208471876 | 100.0% | 121,6 | 126 | 0,976 | 95,4  | 8,1  | 99.1% |
| ERX2465395  | 3197654 | 384925961 | 100.0% | 120,4 | 126 | 0,974 | 171   | 11,9 | 98.4% |
| ERX2465477  | 2316113 | 276084185 | 100.0% | 119,2 | 126 | 0,975 | 125,4 | 6,7  | 98.7% |
| ERX2465389  | 3258614 | 391690864 | 100.0% | 120,2 | 126 | 0,882 | 158,8 | 9,9  | 98.5% |
| ERX2465573  | 2725345 | 320604852 | 100.0% | 117,6 | 126 | 0,976 | 141,6 | 8,9  | 98.7% |
| ERX2465168  | 2757527 | 341387315 | 100.0% | 123,8 | 126 | 0,94  | 148,4 | 8,8  | 98.8% |
| ERX2465549  | 2200594 | 264428131 | 100.0% | 120,2 | 126 | 0,91  | 111,7 | 7    | 98.7% |
| ERX2465476  | 2333728 | 279720820 | 100.0% | 119,9 | 126 | 0,975 | 126,4 | 8    | 98.5% |
| ERX2465210  | 1941453 | 235379039 | 100.0% | 121,2 | 126 | 0,831 | 91,3  | 5,6  | 98.7% |
| ERX2465396  | 2266380 | 275283333 | 100.0% | 121,5 | 126 | 0,953 | 121,8 | 6,7  | 98.6% |
| ERX2465474  | 2879749 | 333954215 | 100.0% | 116   | 126 | 0,972 | 149,7 | 9,4  | 98.5% |
| ERX2465440  | 3936558 | 451520736 | 100.0% | 114,7 | 126 | 0,969 | 202,2 | 10,8 | 98.3% |
| ERX2465296  | 1543876 | 191565858 | 100.0% | 124,1 | 126 | 0,96  | 84,5  | 5,4  | 98.5% |
| ERX2465576  | 1460648 | 176125404 | 100.0% | 120,6 | 126 | 0,969 | 77,8  | 5,7  | 98.4% |
| ERX2465523  | 3510085 | 415195730 | 100.0% | 118,3 | 126 | 0,916 | 177,4 | 11,4 | 98.5% |
| ERX2465171* | 5713242 | 570561290 | 100.0% | 99,9  | 126 | 0,03  | 9     | 2,8  | 98.6% |
| ERX2465211  | 1141041 | 142069112 | 100.0% | 124,5 | 126 | 0,965 | 63,1  | 4,4  | 99.0% |
| ERX2465557* | 3080958 | 341103993 | 100.0% | 110,7 | 126 | 0,049 | 8,3   | 2    | 98.7% |
| ERX2465254  | 2021675 | 242197001 | 100.0% | 119,8 | 126 | 0,973 | 108   | 7,1  | 98.6% |
| ERX2465413  | 2869848 | 334957399 | 100.0% | 116,7 | 126 | 0,978 | 148,3 | 11,1 | 98.5% |
| ERX2465594  | 2296833 | 274066190 | 100.0% | 119,3 | 126 | 0,964 | 122,3 | 7,4  | 98.6% |
| ERX2465362  | 2396211 | 285341296 | 100.0% | 119,1 | 126 | 0,977 | 127,5 | 7,9  | 98.5% |
| ERX2465289  | 2200359 | 262438432 | 100.0% | 119,3 | 126 | 0,975 | 116,3 | 7,8  | 98.3% |
| ERX2465282  | 1141006 | 137038281 | 100.0% | 120,1 | 126 | 0,975 | 61,9  | 4,6  | 98.9% |
| ERX2465176  | 2086205 | 249345502 | 100.0% | 119,5 | 126 | 0,972 | 111,4 | 6,6  | 98.5% |
| ERX2465288  | 1931849 | 232595433 | 100.0% | 120,4 | 126 | 0,969 | 105,6 | 6,8  | 98.7% |
| ERX2465400  | 3767636 | 438873299 | 100.0% | 116,5 | 126 | 0,966 | 195,5 | 12,1 | 98.6% |
| ERX2465498* | 2590767 | 295836021 | 100.0% | 114,2 | 126 | 0,091 | 13,1  | 2,1  | 98.5% |
| ERX2465372  | 2296890 | 269348816 | 100.0% | 117,3 | 126 | 0,967 | 122,5 | 7,1  | 99.1% |
| ERX2465319  | 2229778 | 265390576 | 100.0% | 119   | 126 | 0,97  | 119   | 6,7  | 98.5% |
| ERX2465203  | 1758390 | 216849083 | 100.0% | 123,3 | 126 | 0,981 | 99,5  | 5,8  | 98.7% |
| ERX2465559  | 2372177 | 280489624 | 100.0% | 118,2 | 126 | 0,973 | 127   | 6,4  | 98.4% |
| ERX2465601  | 3903473 | 447519227 | 100.0% | 114,6 | 126 | 0,884 | 186   | 8,8  | 98.4% |
| ERX2465408  | 2000000 | 234189724 | 100.0% | 117,1 | 126 | 0,975 | 92,1  | 7,1  | 98.9% |
| ERX2465380  | 2676761 | 311253794 | 100.0% | 116,3 | 126 | 0,98  | 142,8 | 10,2 | 98.1% |
| ERX2465418  | 2477290 | 290979814 | 100.0% | 117,5 | 126 | 0,974 | 128,6 | 8,1  | 98.6% |
| ERX2465628  | 2615966 | 306532657 | 100.0% | 117,2 | 126 | 0,963 | 137   | 7,1  | 98.5% |
| ERX2465392  | 935055  | 112682464 | 100.0% | 120,5 | 126 | 0,963 | 51,2  | 3,9  | 99.0% |
| ERX2465548* | 3011400 | 349883110 | 100.0% | 116,2 | 126 | 0,218 | 36,7  | 3,1  | 99.0% |
| ERX2465640  | 1579965 | 187213061 | 100.0% | 118,5 | 126 | 0,945 | 82,1  | 4,9  | 98.3% |
| ERX2465653  | 1892347 | 229240518 | 100.0% | 121,1 | 126 | 0,974 | 103   | 6,1  | 98.7% |
| ERX2465465  | 2000000 | 240594172 | 100.0% | 120,3 | 126 | 0,972 | 107,1 | 6,3  | 98.4% |

|             |         |           |        |       |     |       |       |      |       |
|-------------|---------|-----------|--------|-------|-----|-------|-------|------|-------|
| ERX2465255* | 2000000 | 239585961 | 100.0% | 119,8 | 126 | 0,557 | 61,3  | 4,2  | 98.8% |
| ERX2465335  | 2000000 | 239292305 | 100.0% | 119,6 | 126 | 0,974 | 105   | 6,8  | 98.4% |
| ERX2465209  | 2000000 | 235831197 | 100.0% | 117,9 | 126 | 0,976 | 106,3 | 7    | 99.0% |
| ERX2465461  | 1999999 | 236214372 | 100.0% | 118,1 | 126 | 0,977 | 106,3 | 6,3  | 98.2% |
| ERX2465553  | 2000000 | 234794799 | 100.0% | 117,4 | 126 | 0,98  | 105,4 | 5,9  | 98.5% |
| ERX2465688  | 1999999 | 237009391 | 100.0% | 118,5 | 126 | 0,971 | 101,4 | 7,6  | 98.8% |
| ERX2465540  | 2000000 | 241206292 | 100.0% | 120,6 | 126 | 0,982 | 104,8 | 7,9  | 98.5% |
| ERX2465672* | 1999996 | 227786141 | 100.0% | 113,9 | 126 | 0,453 | 49,4  | 3,6  | 98.2% |
| ERX2465324  | 2000000 | 235181141 | 100.0% | 117,6 | 126 | 0,803 | 80,8  | 5,9  | 98.5% |
| ERX2465508  | 1831909 | 221750868 | 100.0% | 121   | 126 | 0,981 | 99,8  | 6,7  | 98.7% |
| ERX2465420  | 1939804 | 240002935 | 100.0% | 123,7 | 126 | 0,978 | 108   | 6,6  | 98.7% |
| ERX2465533  | 1697646 | 204526870 | 100.0% | 120,5 | 126 | 0,976 | 91,6  | 5,1  | 98.4% |
| ERX2465660  | 1999999 | 237900360 | 100.0% | 119   | 126 | 0,98  | 91,7  | 8,8  | 98.3% |
| ERX2465198  | 2530541 | 302463653 | 100.0% | 119,5 | 126 | 0,976 | 134,2 | 7,4  | 98.5% |
| ERX2465603  | 2361343 | 275185274 | 100.0% | 116,5 | 126 | 0,98  | 126,5 | 7,5  | 99.0% |
| ERX2465361  | 2000000 | 239597759 | 100.0% | 119,8 | 126 | 0,977 | 92,1  | 9,5  | 98.3% |
| ERX2465526  | 2000000 | 236832081 | 100.0% | 118,4 | 126 | 0,983 | 92,9  | 11,2 | 98.6% |
| ERX2465346  | 1213063 | 146622035 | 100.0% | 120,9 | 126 | 0,978 | 49,3  | 6,5  | 98.5% |
| ERX2465262  | 2451280 | 294507055 | 100.0% | 120,1 | 126 | 0,981 | 132,2 | 8,3  | 98.7% |
| ERX2465330  | 2000000 | 237035848 | 100.0% | 118,5 | 126 | 0,98  | 102   | 7,7  | 98.6% |
| ERX2465192* | 3745979 | 452731740 | 100.0% | 120,9 | 126 | 0,05  | 10,6  | 1,8  | 99.0% |
| ERX2465427  | 3779479 | 441413807 | 100.0% | 116,8 | 126 | 0,962 | 196,6 | 8,1  | 98.4% |
| ERX2465222  | 1505578 | 186528218 | 100.0% | 123,9 | 126 | 0,967 | 82,6  | 5,5  | 98.7% |
| ERX2465302  | 2000000 | 240004447 | 100.0% | 120   | 126 | 0,984 | 86,1  | 12,4 | 98.6% |
| ERX2465236  | 2000000 | 231812873 | 100.0% | 115,9 | 126 | 0,981 | 99,6  | 7    | 98.0% |
| ERX2465684  | 2000000 | 238004873 | 100.0% | 119   | 126 | 0,98  | 107,4 | 6,5  | 98.1% |
| ERX2465253  | 2000000 | 239025814 | 100.0% | 119,5 | 126 | 0,973 | 105,5 | 6,6  | 99.0% |
| ERX2465633  | 2000000 | 239790144 | 100.0% | 119,9 | 126 | 0,979 | 98,6  | 8,6  | 98.3% |
| ERX2465206  | 2000000 | 241410065 | 100.0% | 120,7 | 126 | 0,979 | 103   | 7,7  | 98.4% |
| ERX2465227  | 2000000 | 238305173 | 100.0% | 119,2 | 126 | 0,978 | 105,1 | 6,9  | 98.6% |
| ERX2465454  | 2000000 | 238458602 | 100.0% | 119,2 | 126 | 0,979 | 106,9 | 6,3  | 98.5% |
| ERX2465223  | 2000000 | 238439164 | 100.0% | 119,2 | 126 | 0,984 | 107,7 | 6,8  | 98.8% |
| ERX2465486  | 1472352 | 180783812 | 100.0% | 122,8 | 126 | 0,983 | 82,9  | 5,3  | 98.8% |
| ERX2465270  | 2308675 | 282915938 | 100.0% | 122,5 | 126 | 0,704 | 91    | 5,6  | 98.6% |
| ERX2465185  | 2402876 | 295580208 | 100.0% | 123   | 126 | 0,966 | 131,8 | 7,1  | 98.7% |
| ERX2465422  | 883616  | 106062568 | 100.0% | 120   | 126 | 0,923 | 44,8  | 3,6  | 98.6% |
| ERX2465495  | 1899876 | 229995459 | 100.0% | 121,1 | 126 | 0,979 | 106,2 | 5,7  | 99.1% |
| ERX2465188  | 1944815 | 242334002 | 100.0% | 124,6 | 126 | 0,981 | 109,9 | 6,1  | 98.7% |
| ERX2465278  | 2083063 | 255592943 | 100.0% | 122,7 | 126 | 0,95  | 112   | 6,4  | 98.5% |
| ERX2465662  | 1088402 | 133576015 | 100.0% | 122,7 | 126 | 0,975 | 60    | 4,2  | 98.8% |
| ERX2465337  | 2000000 | 239906167 | 100.0% | 120   | 126 | 0,953 | 101,6 | 9,4  | 98.6% |
| ERX2465453  | 2000000 | 241039378 | 100.0% | 120,5 | 126 | 0,982 | 110   | 5,6  | 98.6% |
| ERX2465647  | 2000000 | 243244813 | 100.0% | 121,6 | 126 | 0,978 | 106,7 | 7,1  | 98.5% |
| ERX2465186* | 2280983 | 270693764 | 100.0% | 118,7 | 126 | 0,352 | 44,8  | 3,2  | 98.7% |
| ERX2465307  | 2000000 | 243333574 | 100.0% | 121,7 | 126 | 0,982 | 109,9 | 6,3  | 98.7% |
| ERX2465162  | 2000000 | 237028396 | 100.0% | 118,5 | 126 | 0,982 | 106,5 | 7    | 98.5% |
| ERX2465577  | 2000000 | 235950053 | 100.0% | 118   | 126 | 0,965 | 106,4 | 5    | 98.3% |
| ERX2465504  | 2000000 | 232831249 | 100.0% | 116,4 | 126 | 0,775 | 84    | 5,2  | 98.6% |

|             |         |           |        |       |     |       |       |     |       |
|-------------|---------|-----------|--------|-------|-----|-------|-------|-----|-------|
| ERX2465623  | 2000000 | 238804378 | 100.0% | 119,4 | 126 | 0,983 | 107,6 | 6,4 | 98.6% |
| ERX2465394  | 2000000 | 240479933 | 100.0% | 120,2 | 126 | 0,98  | 109,2 | 6,4 | 98.7% |
| ERX2465360  | 2000000 | 238647229 | 100.0% | 119,3 | 126 | 0,976 | 108,1 | 6   | 98.7% |
| ERX2465641  | 2000000 | 244700766 | 100.0% | 122,4 | 126 | 0,976 | 110,3 | 6,4 | 98.6% |
| ERX2465597  | 2000000 | 240688723 | 100.0% | 120,3 | 126 | 0,981 | 109,8 | 6,1 | 98.8% |
| ERX2465516  | 2000000 | 234841737 | 100.0% | 117,4 | 126 | 0,87  | 95,2  | 5,7 | 98.4% |
| ERX2465438* | 1999999 | 236401266 | 100.0% | 118,2 | 126 | 0,457 | 50,8  | 3,5 | 98.6% |
| ERX2465689  | 2000000 | 232775777 | 100.0% | 116,4 | 126 | 0,978 | 104,9 | 5,9 | 98.4% |
| ERX2465652  | 2000000 | 241386902 | 100.0% | 120,7 | 126 | 0,975 | 106,8 | 7,5 | 98.6% |
| ERX2465466  | 1951823 | 236134097 | 100.0% | 121   | 126 | 0,973 | 106,8 | 5,4 | 99.0% |
| ERX2465646  | 1560679 | 176440897 | 100.0% | 113,1 | 126 | 0,977 | 79,3  | 5,3 | 98.3% |
| ERX2465215  | 2000000 | 233435914 | 100.0% | 116,7 | 126 | 0,981 | 96,3  | 8,3 | 98.6% |
| ERX2465234  | 1999999 | 239164880 | 100.0% | 119,6 | 126 | 0,979 | 108,6 | 6,5 | 98.7% |
| ERX2465534* | 2000000 | 233015923 | 100.0% | 116,5 | 126 | 0,06  | 6,2   | 1,8 | 98.9% |
| ERX2465614* | 1999999 | 238807317 | 100.0% | 119,4 | 126 | 0,015 | 1,6   | 1,4 | 99.0% |
| ERX2465583  | 2000000 | 241600924 | 100.0% | 120,8 | 126 | 0,977 | 108,8 | 6,5 | 98.7% |
| ERX2465200* | 1999997 | 227102980 | 100.0% | 113,6 | 126 | 0,436 | 47,7  | 3,6 | 98.7% |
| ERX2465391  | 2000000 | 236196749 | 100.0% | 118,1 | 126 | 0,977 | 104,8 | 7,3 | 98.6% |
| ERX2465449  | 1549731 | 181321530 | 100.0% | 117   | 126 | 0,976 | 81,4  | 5,2 | 98.5% |
| ERX2465588  | 2000000 | 240096766 | 100.0% | 120   | 126 | 0,978 | 107,4 | 6,6 | 98.8% |
| ERX2465242  | 1917623 | 227903087 | 100.0% | 118,8 | 126 | 0,969 | 101,3 | 6,7 | 98.6% |
| ERX2465231  | 1757641 | 207149771 | 100.0% | 117,9 | 126 | 0,979 | 92,4  | 6,1 | 98.6% |
| ERX2465568  | 1508146 | 178272438 | 100.0% | 118,2 | 126 | 0,822 | 67,6  | 4,8 | 98.4% |
| ERX2465625  | 1650333 | 193771289 | 100.0% | 117,4 | 126 | 0,98  | 82,8  | 6,7 | 98.5% |
| ERX2465315  | 1889054 | 222972166 | 100.0% | 118   | 126 | 0,977 | 98,1  | 6,8 | 98.6% |
| ERX2465543  | 1769744 | 208261650 | 100.0% | 117,7 | 126 | 0,916 | 87,7  | 6,1 | 98.7% |
| ERX2465615  | 1757188 | 206471466 | 100.0% | 117,5 | 126 | 0,98  | 91,5  | 6,6 | 98.8% |
| ERX2465286  | 1995162 | 231332087 | 100.0% | 115,9 | 126 | 0,978 | 102,4 | 6,4 | 98.2% |
| ERX2465485  | 1999999 | 231903909 | 100.0% | 116   | 126 | 0,979 | 104,8 | 6,4 | 98.8% |
| ERX2465492  | 1999998 | 232634092 | 100.0% | 116,3 | 126 | 0,966 | 103,5 | 7   | 98.5% |
| ERX2465221  | 2000000 | 224340008 | 100.0% | 112,2 | 126 | 0,981 | 100,8 | 6,1 | 98.3% |
| ERX2465624  | 1997325 | 230095631 | 100.0% | 115,2 | 126 | 0,971 | 103,7 | 4,9 | 98.6% |
| ERX2465343  | 2000000 | 238800285 | 100.0% | 119,4 | 126 | 0,974 | 108,4 | 4,8 | 98.8% |
| ERX2465190  | 2000000 | 244240848 | 100.0% | 122,1 | 126 | 0,947 | 105,2 | 7   | 98.8% |
| ERX2465169  | 2000000 | 249521349 | 100.0% | 124,8 | 126 | 0,977 | 113,9 | 5,1 | 98.8% |
| ERX2465331  | 2000000 | 248347041 | 100.0% | 124,2 | 126 | 0,978 | 113,5 | 5,1 | 98.7% |
| ERX2465268  | 2000000 | 237624196 | 100.0% | 118,8 | 126 | 0,961 | 106   | 5,2 | 98.3% |
| ERX2465631  | 1424320 | 170828213 | 100.0% | 119,9 | 126 | 0,968 | 76,4  | 4,5 | 98.8% |
| ERX2465522* | 1999999 | 247116851 | 100.0% | 123,6 | 126 | 0,099 | 11,4  | 1,8 | 98.7% |
| ERX2465357  | 2000000 | 247755094 | 100.0% | 123,9 | 126 | 0,976 | 113,5 | 5,1 | 98.8% |
| ERX2465567  | 2000000 | 248208506 | 100.0% | 124,1 | 126 | 0,978 | 113,8 | 5,6 | 98.3% |
| ERX2465276  | 2000000 | 239921512 | 100.0% | 120   | 126 | 0,826 | 92,3  | 5,6 | 98.4% |
| ERX2465473  | 2000000 | 245230930 | 100.0% | 122,6 | 126 | 0,979 | 110   | 6,6 | 98.4% |
| ERX2465539  | 2000000 | 247735636 | 100.0% | 123,9 | 126 | 0,977 | 113,3 | 6,3 | 99.1% |

\*These isolates were in the Research Center Borstel (MTBseq) pipeline reported as likely contaminated with non-mycobacterial DNA, as indicated from the detection of low frequency variants.

**Supplementary Table S3. Patient characteristics of 527/535 patients with complete data from the Netherlands Tuberculosis Register. This table was published in an earlier study [Jajou *et al.* Epidemiological links between tuberculosis cases identified twice as efficiently by whole genome sequencing than conventional molecular typing: A population-based study. *Plos One*. 2018;13(4):e0195413]. This supplementary material is hosted by *Eurosurveillance* as supporting information alongside the article [Towards standardisation: comparison of five whole genome sequencing (WGS) analysis pipelines for detection of epidemiologically linked tuberculosis cases], on behalf of the authors, who remain responsible for the accuracy and appropriateness of the content. The same standards for ethics, copyright, attributions and permissions as for the article apply. Supplements are not edited by *Eurosurveillance* and the journal is not responsible for the maintenance of any links or email addresses provided therein.**

|                                        | <b>Study population (n = 527)</b> |
|----------------------------------------|-----------------------------------|
| <b>Age in years, median (range)</b>    | 35 (0 – 102)                      |
| <b>Age in categories (in years)</b>    |                                   |
| 0-24                                   | 127 (23.7%)                       |
| 25-44                                  | 215 (40.8%)                       |
| 45-64                                  | 105 (19.9%)                       |
| 65+                                    | 80 (15.2%)                        |
| <b>Gender, male</b>                    | 316 (60%)                         |
| <b>Rural living</b>                    | 373 (70.8%)                       |
| <b>Diagnosis</b>                       |                                   |
| PTB                                    | 255 (48.4%)                       |
| ETB                                    | 200 (38%)                         |
| PTB+ETB                                | 72 (13.7%)                        |
| <b>Resistance</b>                      |                                   |
| Isoniazid mono-resistance              | 30 (5.7%)                         |
| Rifampicin mono-resistance             | 2 (0.4%)                          |
| Pyrazinamide mono-resistance           | 15 (2.8%)                         |
| Multidrug-resistant                    | 12 (2.3%)                         |
| <b>Ethnicity</b>                       |                                   |
| Dutch                                  | 65 (12.3%)                        |
| First generation migrant <sup>a</sup>  | 413 (78.4%)                       |
| Second generation migrant <sup>b</sup> | 36 (6.8%)                         |
| Unknown                                | 13 (2.5%)                         |
| <b>Risk group</b>                      |                                   |
| Contact of tuberculosis patient        | 41 (7.8%)                         |
| Immigrant <sup>c</sup>                 | 35 (6.6%)                         |
| Asylum seeker <sup>d</sup>             | 106 (20.1%)                       |
| Undocumented migrant                   | 21 (4%)                           |
| Homeless                               | 14 (2.7%)                         |
| Alcohol addict                         | 4 (0.8%)                          |
| Drug addict                            | 6 (1.1%)                          |
| Prisoner                               | 11 (2.1%)                         |
| Travel to endemic regions > 3 months   | 15 (2.8%)                         |
| <b>Comorbidity</b>                     |                                   |
| Diabetes                               | 28 (5.3%)                         |
| Malignancy                             | 19 (3.6%)                         |
| Renal failure                          | 8 (1.5%)                          |
| Organ transplantation                  | 2 (0.4%)                          |
| <b>Lineages <sup>e</sup></b>           |                                   |
| EAI                                    | 60 (11.2%)                        |
| Beijing                                | 43 (8.3%)                         |
| Delhi/CAS                              | 117 (22.5%)                       |
| EAS                                    | 127 (24.4%)                       |
| LAM                                    | 57 (11%)                          |
| Cameroon                               | 4 (0.8%)                          |

|                                 |           |
|---------------------------------|-----------|
| Haarlem                         | 78 (15%)  |
| S-type                          | 12 (2.3%) |
| TUR                             | 2 (0.4%)  |
| Uganda                          | 3 (0.6%)  |
| Ural                            | 7 (1.3%)  |
| West African 1                  | 1 (0.2%)  |
| West African 2                  | 2 (0.4%)  |
| No lineage assigned by PhyResSe | 7 (1.3%)  |

PTB: pulmonary tuberculosis; ETB: extra-pulmonary tuberculosis; EAI: East-African-Indian; CAS: Central-Asian; EAS: Euro-American; LAM: Latin American-Mediterranean

<sup>a</sup> This is in the Netherlands Tuberculosis Register defined as a person was foreign-born and at least one parent was foreign-born.

<sup>b</sup> This is in the Netherlands Tuberculosis Register defined as a person born in the Netherlands, of whom at least one parent was foreign-born.

<sup>c</sup> This is in the Netherlands Tuberculosis Register defined as a person with a legal residence status other than a tourist or refugee/asylum seeker, who is subject to the immigrant screening regulations and who resides in the Netherlands < 2.5 years.

<sup>d</sup> This is in the Netherlands Tuberculosis Register defined as a person who is subject to regulations relating to the screening of asylum seekers, already has a valid residence status as an asylum seeker or is still in the asylum seeker procedure and has been residing in the Netherlands < 2.5 years.

<sup>e</sup> These data are (RIVM) laboratory data and were available for all 535 isolates of which 520 isolates belong to *M. tuberculosis*.

**Supplementary Table S4. Sequences excluded by one or more pipelines. Xs indicate a sequence was excluded in the respective pipeline. This supplementary material is hosted by *Eurosurveillance* as supporting information alongside the article [Towards standardisation: comparison of five whole genome sequencing (WGS) analysis pipelines for detection of epidemiologically linked tuberculosis cases], on behalf of the authors, who remain responsible for the accuracy and appropriateness of the content. The same standards for ethics, copyright, attributions and permissions as for the article apply. Supplements are not edited by *Eurosurveillance* and the journal is not responsible for the maintenance of any links or email addresses provided therein.**

|                | RIVM SNP        | Oxford University SNP | Research Center Borstel (MTBseq) SNP | cgMLST (allele) | SSI SNP         |
|----------------|-----------------|-----------------------|--------------------------------------|-----------------|-----------------|
| ERX2465667     | X               | X                     | X                                    | X               | X               |
| ERX2465614     | X               |                       | X                                    | X               | X               |
| ERX2465534     | X               | X                     | X                                    |                 | X               |
| ERX2465514     | X               | X                     | X                                    | X               | X               |
| ERX2465557     | X               |                       | X                                    | X               | X               |
| ERX2465171     | X               |                       | X                                    | X               | X               |
| ERX2465192     | X               |                       | X                                    |                 | X               |
| ERX2465522     | X               |                       | X                                    |                 | X               |
| ERX2465498     | X               |                       | X                                    |                 | X               |
| ERX2465621     | X               |                       | X                                    |                 | X               |
| ERX2465451     |                 |                       | X                                    |                 |                 |
| ERX2465664     |                 |                       |                                      | X               |                 |
| ERX2465483     |                 |                       |                                      | X               | X               |
| ERX2465610     |                 | X                     |                                      |                 |                 |
| ERX2465299     |                 |                       |                                      |                 | X               |
| ERX2465354     |                 |                       |                                      |                 | X               |
| ERX2465455     |                 | X                     |                                      |                 |                 |
| ERX2465589     |                 | X                     |                                      |                 |                 |
| Total excluded | 10 <sup>a</sup> | 6 <sup>b</sup>        | 11 <sup>c</sup>                      | 7 <sup>d</sup>  | 13 <sup>e</sup> |

<sup>a</sup> Sequences were excluded due to a mean coverage depth < 20x.

<sup>b</sup> Sequences did not pass the pipeline for several reasons based on expert's opinion.

<sup>c</sup> Sequences excluded due to insufficient coverage depth < 30x or breadth < 80%, and/or detection of considerable contamination by non-MTBC sequence.

<sup>d</sup> Sequences excluded due to < 90% of the genes in the cgMLST scheme passing quality criteria.

<sup>e</sup> Sequences excluded due to at least 95% of the H37Rv reference genome (not including repetitive regions) was required to be above 10x coverage depth.
